# Supplementary material for: Identification of chalcone analogues as anti-inflammatory agents through the regulation of NF-κB and JNK activation
Source: Royal Society of Chemistry journal article supplement (doi:10.1039/d4md00011k), 2024-01-01
Supplement: d4md00011k1.pdf [file d4md00011k1.pdf]

*Supporting Information for*

**Identification of Chalcone Analogues as Anti-  
Inflammatory Agents through Regulation of NF- $\kappa$ B  
and JNK Activation**

Die Zhang<sup>1,‡</sup>, Wenping Wang<sup>1,‡</sup>, Huiping Ou<sup>1, 2‡</sup>, Jinhua Ning<sup>1</sup>, Yingxun Zhou<sup>1</sup>, Jin Ke<sup>1</sup>, Anguo Hou<sup>1</sup>, Linyun Chen<sup>1</sup>, Peng Li<sup>2, 3\*</sup>, Yunshu Ma<sup>1\*</sup> and Wen Bin Jin<sup>1, 3\*</sup>

1 Key Laboratory of External Drug Delivery System and Preparation Technology in Universities of Yunnan and Faculty of Chinese Materia Medica, Yunnan University of Chinese Medicine, Kunming, Yunnan, China

2 School of Food and Drug, Shenzhen Polytechnic University, Shenzhen, Guangdong, China

3 State Key Laboratory of Chemical Biology and Drug Discovery and Department of Applied Biology and Chemical Technology, The Hong Kong Polytechnic University, Hung Hom, Kowloon, Hong Kong SAR, China

‡These authors contributed equally.

\*Corresponding authors: Yunshu Ma, Peng Li and Wenbin Jin

For Y. S. M., email: [yunshuma2@126.com](mailto:yunshuma2@126.com)

For L. P., email: [lipengwd@szpt.edu.cn](mailto:lipengwd@szpt.edu.cn)

For W. B. J., email: [14900326r@connect.polyu.hk](mailto:14900326r@connect.polyu.hk)

## Table of Content

- Figure S1-S28**  $^1\text{H}$  and  $^{13}\text{C}$  spectra of compounds **3a-3n**, and **4a-4n**.  
**Figure S29-S56** HPLC-purity spectra of compounds **3a-3n**, and **4a-4n**.  
**Figure S57-S64** FT-IR spectra of compounds **3e**, **3j**, **4d**, **4e**, **4i**, **4j**, **4m**, and **4n**

**Figure S1.**  $^1\text{H}$  and  $^{13}\text{C}$  NMR spectra of **(E)-1,3-bis(4-methoxyphenyl)prop-2-en-1-one(3a)**<sup>1</sup>

$^1\text{H}$  NMR (400 MHz, CHLOROFORM-*d*)  $\delta$  ppm 3.85 (s, 3 H) 3.82 (s, 3 H) 6.88 - 7.01 (m, 4 H) 7.42 (d,  $J=15.65$  Hz, 1 H) 7.54 - 7.63 (m, 2 H) 7.77 (d,  $J=15.65$  Hz, 1 H) 7.99 - 8.08 (m, 2 H)

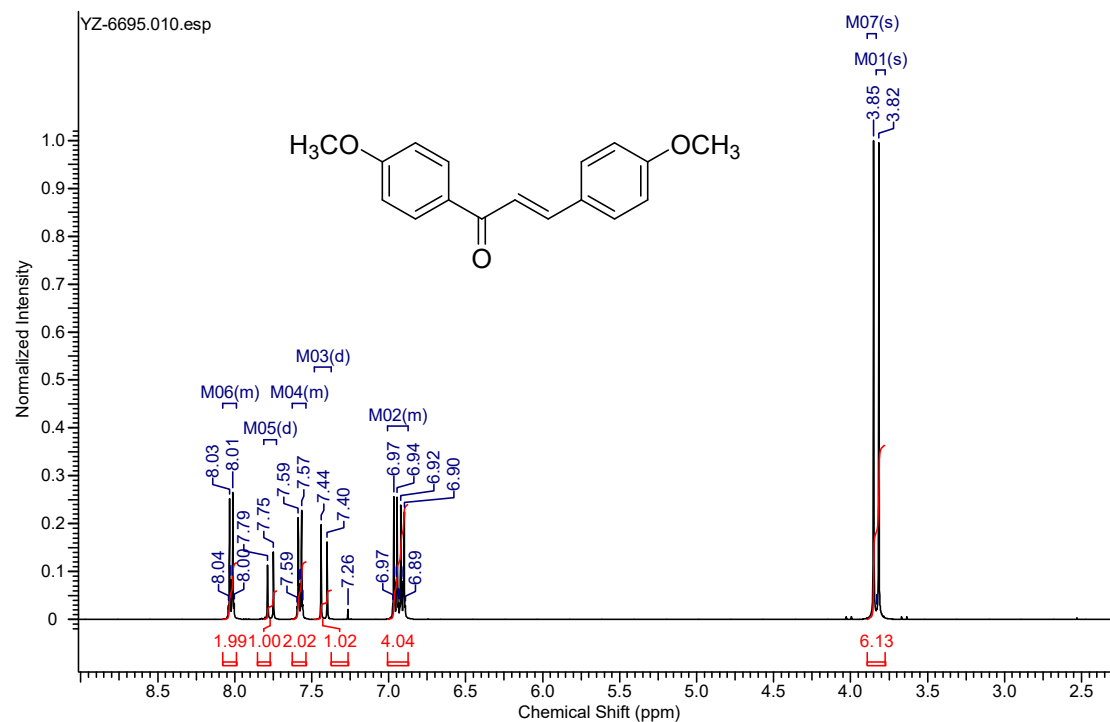

$^{13}\text{C}$  NMR (101 MHz, CHLOROFORM-*d*)  $\delta$  188.7, 163.3, 161.5, 143.8, 131.3, 130.7, 130.1, 127.8, 119.5, 114.4, 113.8, 77.5, 76.8, 55.5, 55.4

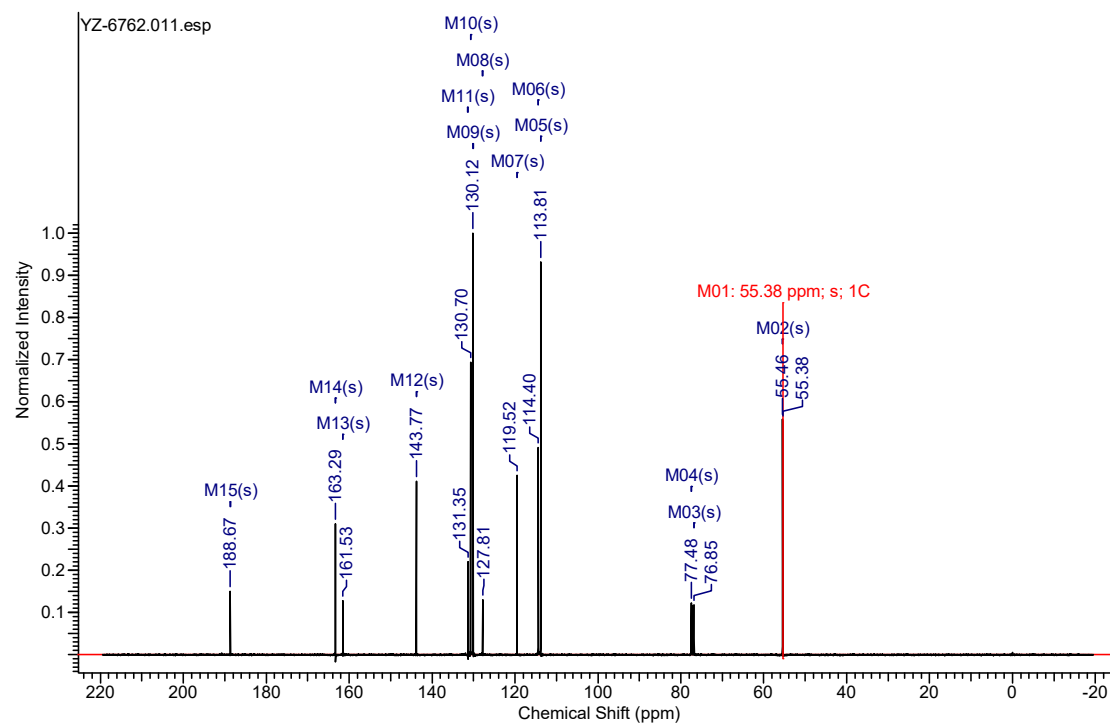

**Figure S2.**  $^1\text{H}$  and  $^{13}\text{C}$  NMR spectra of **(E)-1-(3,4-dimethoxyphenyl)-3-(4-methoxyphenyl)prop-2-en-1-one(3b)**<sup>1</sup>

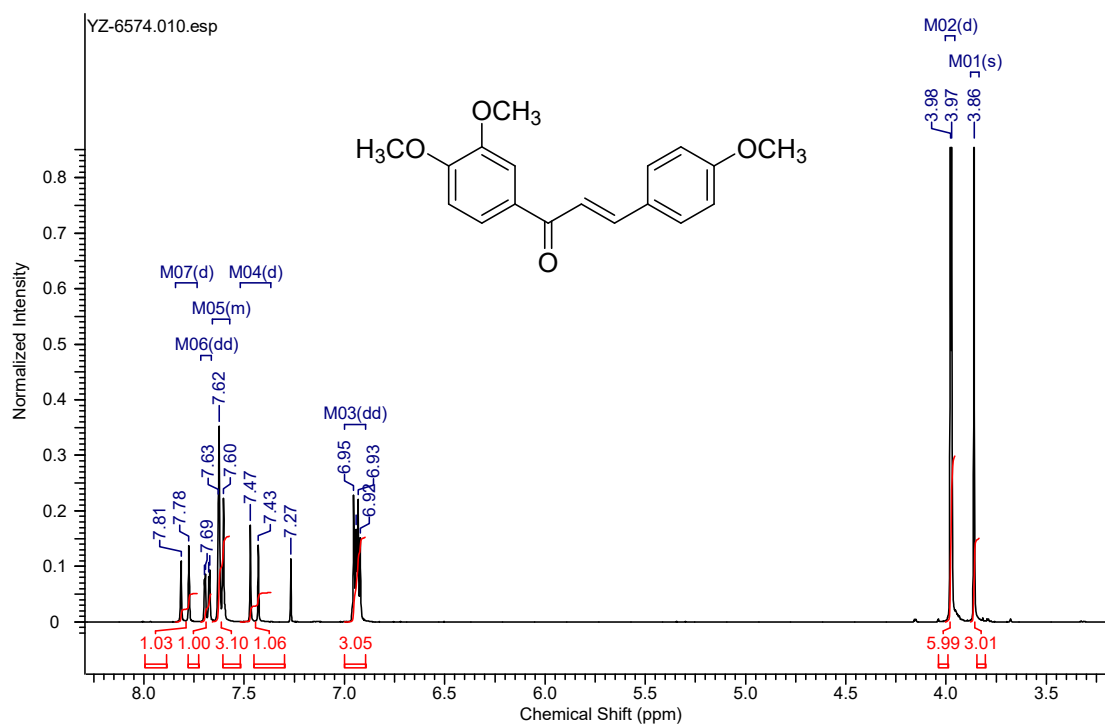

$^1\text{H}$  NMR (400 MHz, CHLOROFORM- $d$ )  $\delta$  7.80 (d,  $J = 15.41$  Hz, 1H), 7.68 (dd,  $J = 1.83, 8.44$  Hz, 1H), 7.57 - 7.66 (m, 3H), 7.45 (d,  $J = 15.65$  Hz, 1H), 6.94 (dd,  $J = 4.40, 8.56$  Hz, 3H), 3.97 (d,  $J = 2.69$  Hz, 6H), 3.86 (s, 3H)

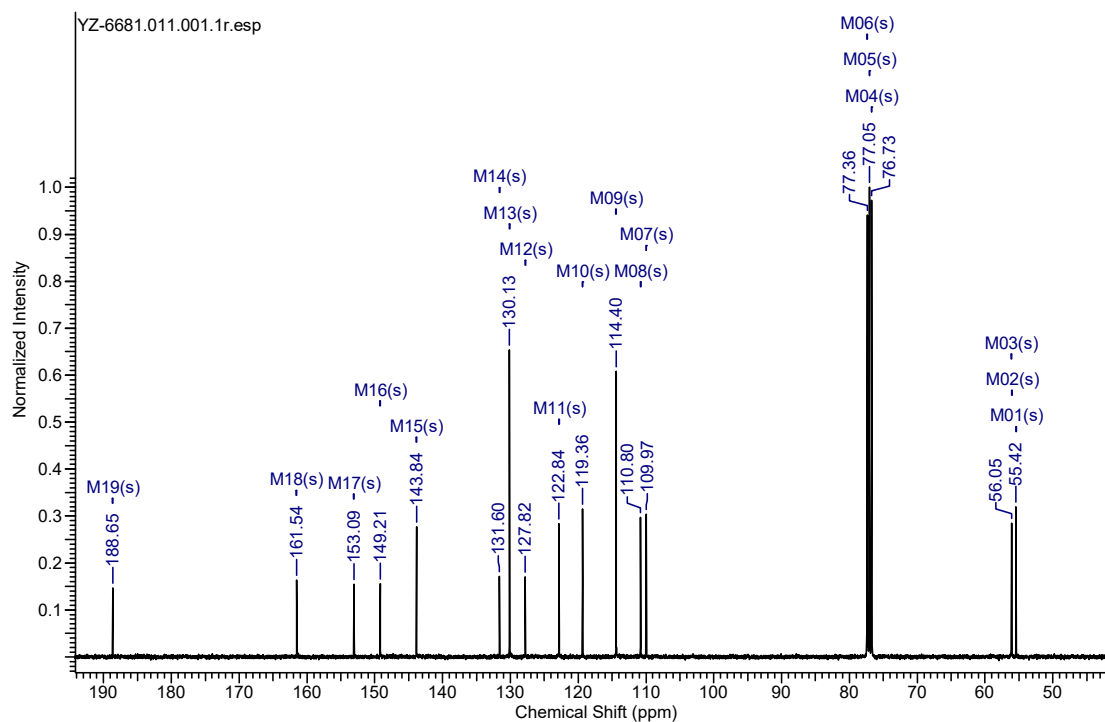

$^{13}\text{C}$  NMR (101 MHz, CHLOROFORM- $d$ )  $\delta$  188.6, 161.5, 153.1, 149.2, 143.8, 131.6, 130.1, 127.8, 122.8, 119.4, 114.4, 110.8, 110.0, 77.4, 77.0, 76.7, 56.1, 56.1, 55.4

**Figure S3.**  $^1\text{H}$  and  $^{13}\text{C}$  NMR spectra of (E)-3-(4-methoxyphenyl)-1-(3,4,5-trimethoxyphenyl)prop-2-en-1-one(3c) $^2$

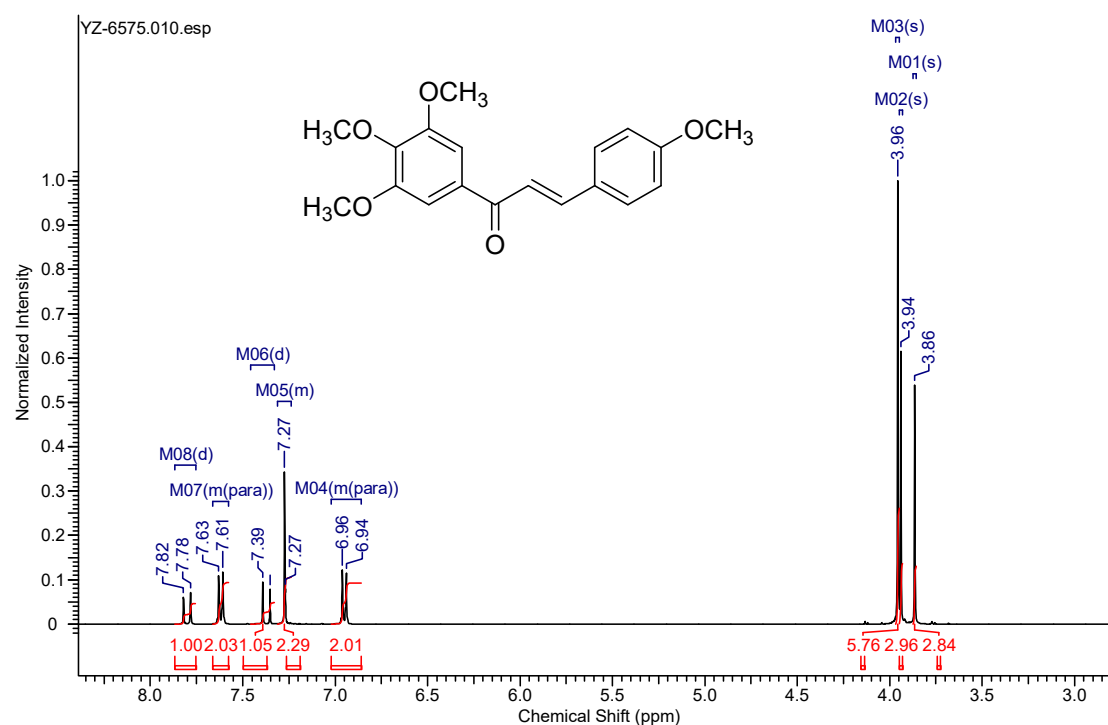

$^1\text{H}$  NMR (400 MHz, CHLOROFORM- $d$ )  $\delta$  7.80 (d,  $J = 15.41$  Hz, 1H), 7.58 - 7.66 (m,  $J = 8.80$  Hz, 2H), 7.37 (d,  $J = 15.65$  Hz, 1H), 7.24 - 7.31 (m, 2H), 6.86 - 7.02 (m,  $J = 8.80$  Hz, 2H), 3.96 (s, 6H), 3.94 (s, 3H), 3.86 (s, 3H)

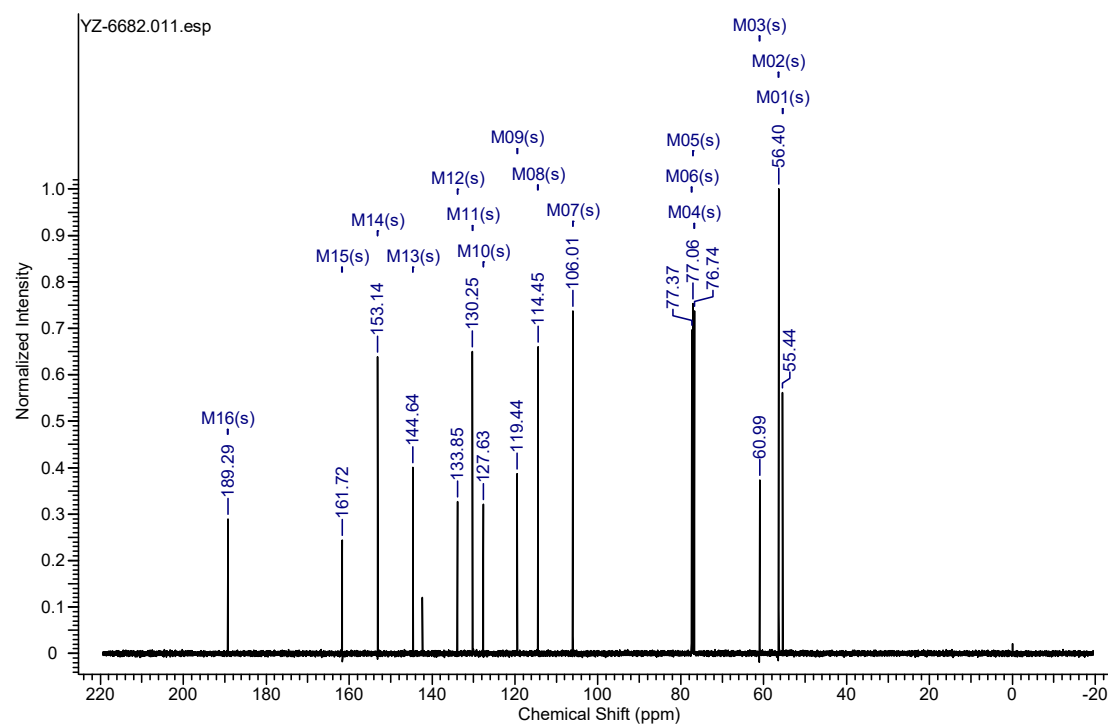

$^{13}\text{C}$  NMR (101 MHz, CHLOROFORM- $d$ )  $\delta$  189.3, 161.7, 153.1, 144.6, 133.9, 130.3, 127.6, 119.4, 114.5, 106.0, 77.4, 77.1, 76.7, 61.0, 56.4, 55.4

**Figure S4.**  $^1\text{H}$  and  $^{13}\text{C}$  NMR spectra of (*E*)-1-(3,5-difluorophenyl)-3-(4-methoxyphenyl)prop-2-en-1-one(3d)<sup>3</sup>

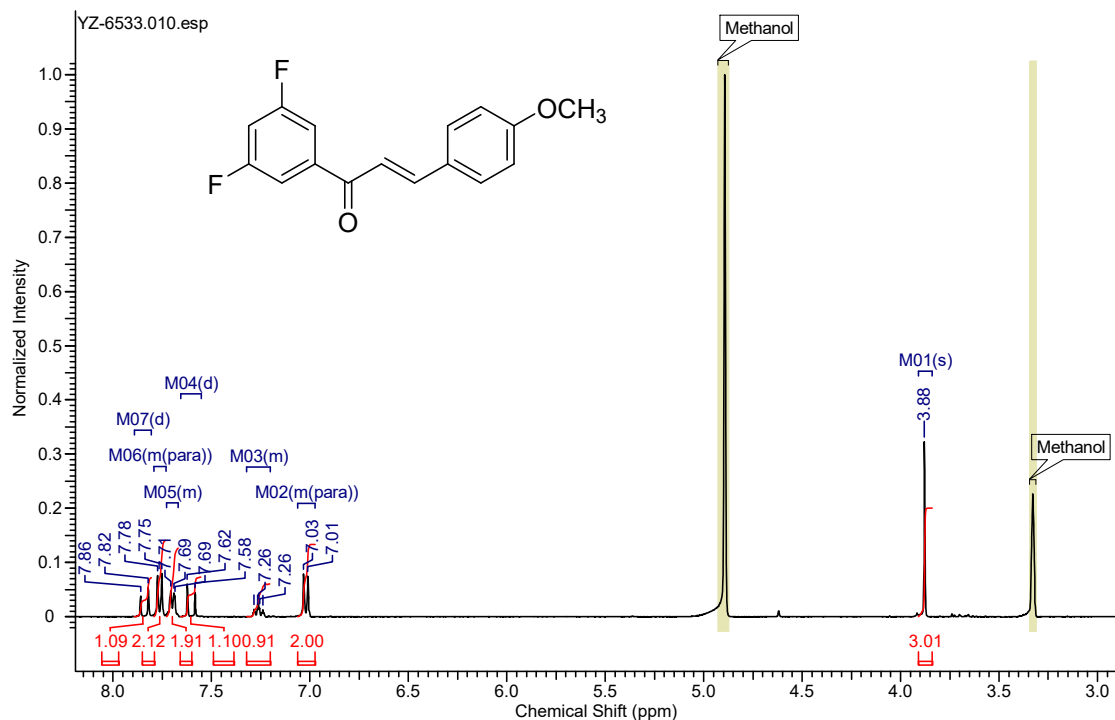

$^1\text{H}$  NMR (400 MHz, METHANOL- $d_4$ )  $\delta$  7.84 (d,  $J$  = 15.41 Hz, 1H), 7.73 - 7.79 (m,  $J$  = 8.80 Hz, 2H), 7.67 - 7.73 (m, 2H), 7.60 (d,  $J$  = 15.65 Hz, 1H), 7.20 - 7.32 (m, 1H), 6.97 - 7.06 (m,  $J$  = 8.80 Hz, 2H), 3.88 (s, 3H)

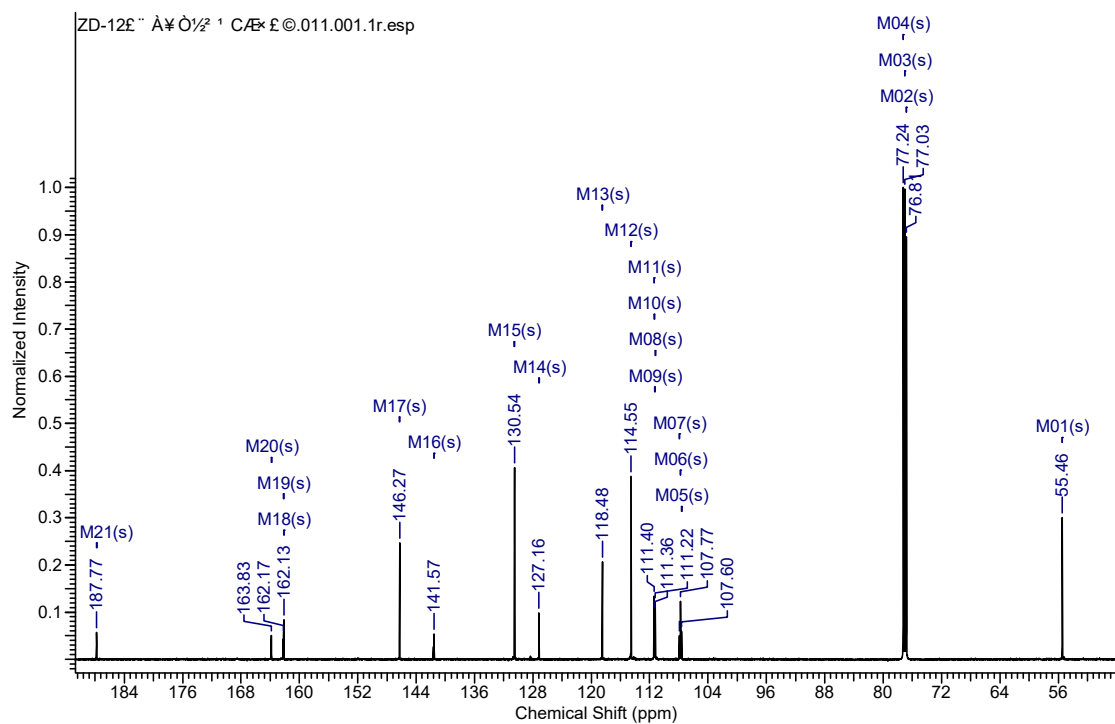

$^{13}\text{C}$  NMR (151 MHz, CHLOROFORM- $d$ )  $\delta$  187.8, 163.8, 162.2, 162.1, 146.3, 141.6, 130.5, 127.2, 118.5, 114.5, 111.4, 111.4, 111.3, 111.2, 107.9, 107.8, 107.6, 77.2, 77.0, 76.8, 55.5

**Figure S5.**  $^1\text{H}$  and  $^{13}\text{C}$  NMR spectra of **(E)-1-(4-fluoro-3-methylphenyl)-3-(4-methoxyphenyl)prop-2-en-1-one(3e)**

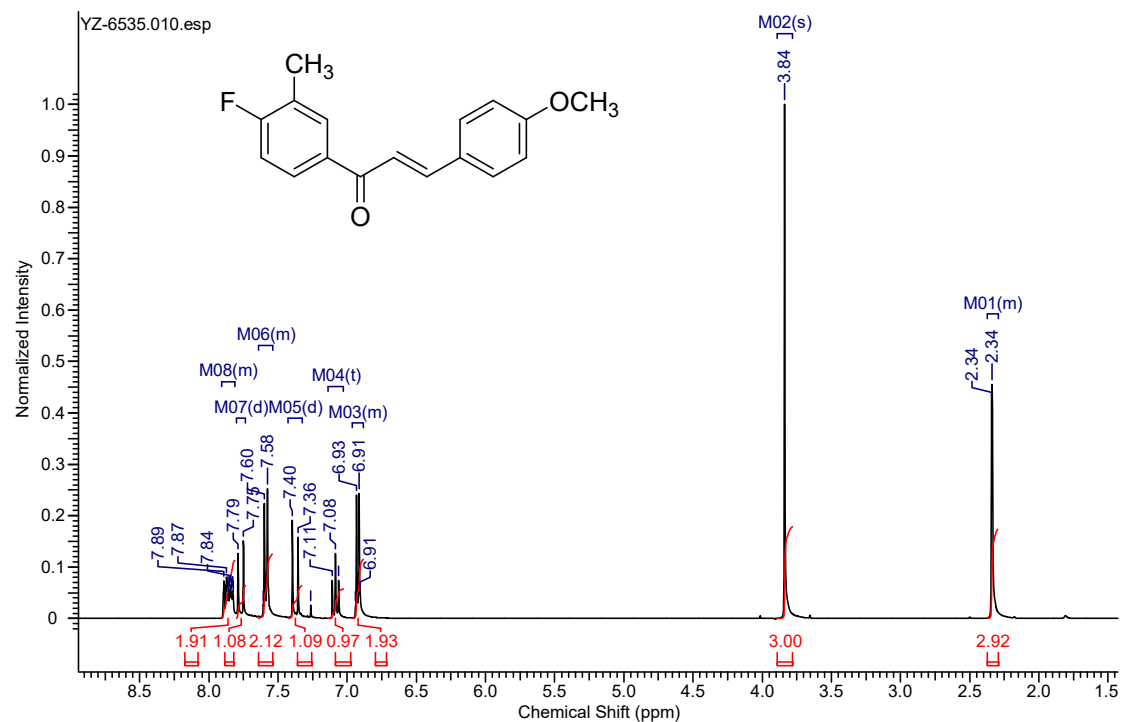

$^1\text{H}$  NMR (400 MHz, CHLOROFORM- $d$ )  $\delta$  7.81 - 7.91 (m, 2H), 7.77 (d,  $J = 15.65$  Hz, 1H), 7.54 - 7.64 (m, 2H), 7.38 (d,  $J = 15.65$  Hz, 1H), 7.08 (t,  $J = 8.80$  Hz, 1H), 6.88 - 6.96 (m, 2H), 3.84 (s, 3H), 2.29 - 2.37 (m, 3H)

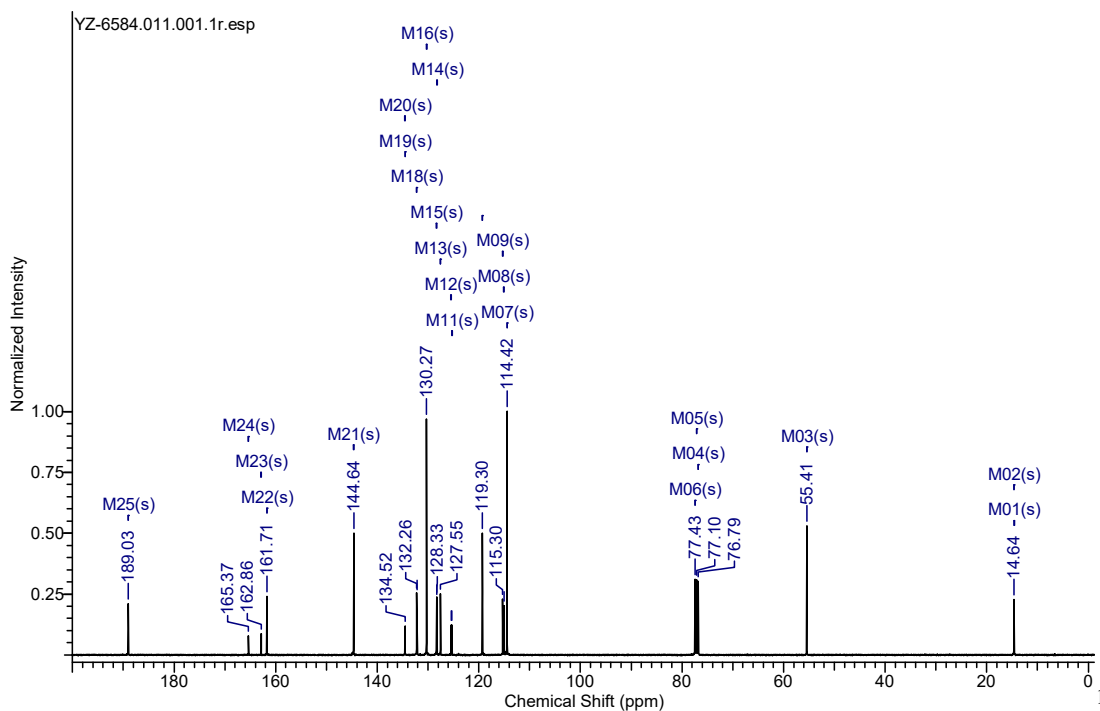

$^{13}\text{C}$  NMR (101 MHz, CHLOROFORM- $d$ )  $\delta$  189.0, 165.4, 162.9, 161.7, 144.6, 134.5, 134.5, 132.3, 132.2, 130.3, 128.3, 128.2, 127.5, 125.5, 125.3, 119.3, 115.3, 115.1, 114.4, 77.4, 77.1, 76.8, 55.4, 14.6, 14.6

**Figure S6.**  $^1\text{H}$  and  $^{13}\text{C}$  NMR spectra of **(E)-3-(3,4-dimethoxyphenyl)-1-(4-methoxyphenyl)prop-2-en-1-one(3f)<sup>4</sup>**

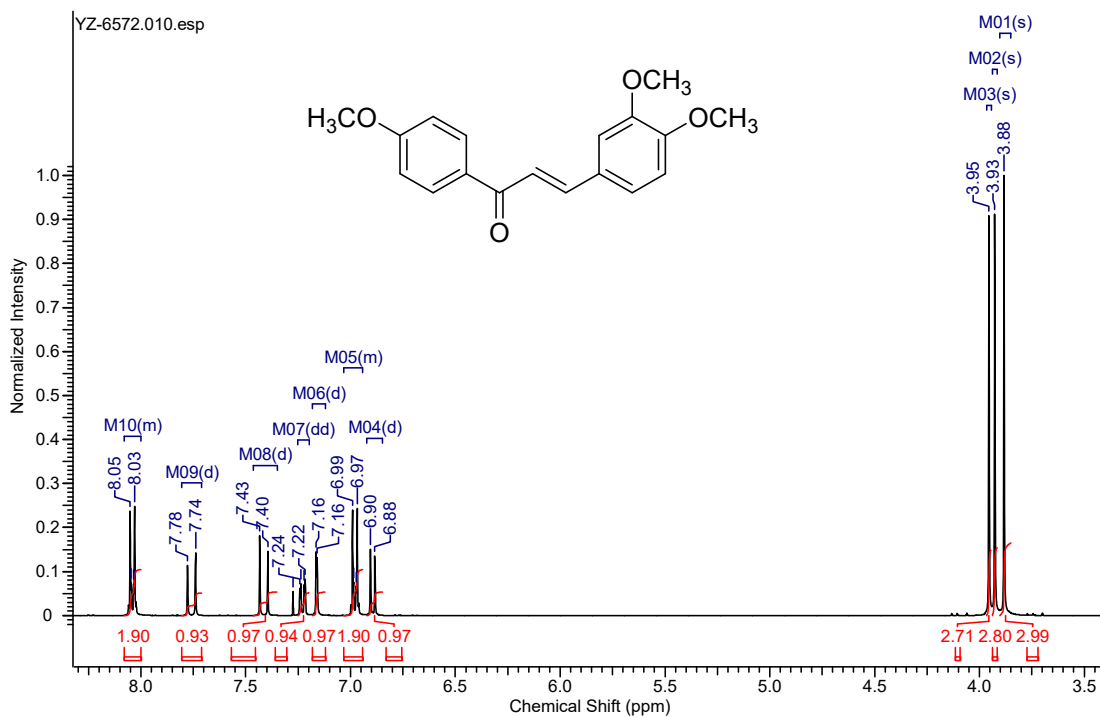

$^1\text{H}$  NMR (400 MHz, CHLOROFORM- $d$ )  $\delta$  8.00 - 8.08 (m, 2H), 7.76 (d,  $J$  = 15.65 Hz, 1H), 7.41 (d,  $J$  = 15.41 Hz, 1H), 7.23 (dd,  $J$  = 1.96, 8.31 Hz, 1H), 7.16 (d,  $J$  = 1.96 Hz,



1H), 6.94 - 7.03 (m, 2H), 6.89 (d,  $J = 8.31$  Hz, 1H), 3.95 (s, 3H), 3.93 (s, 3H), 3.88 (s, 3H)

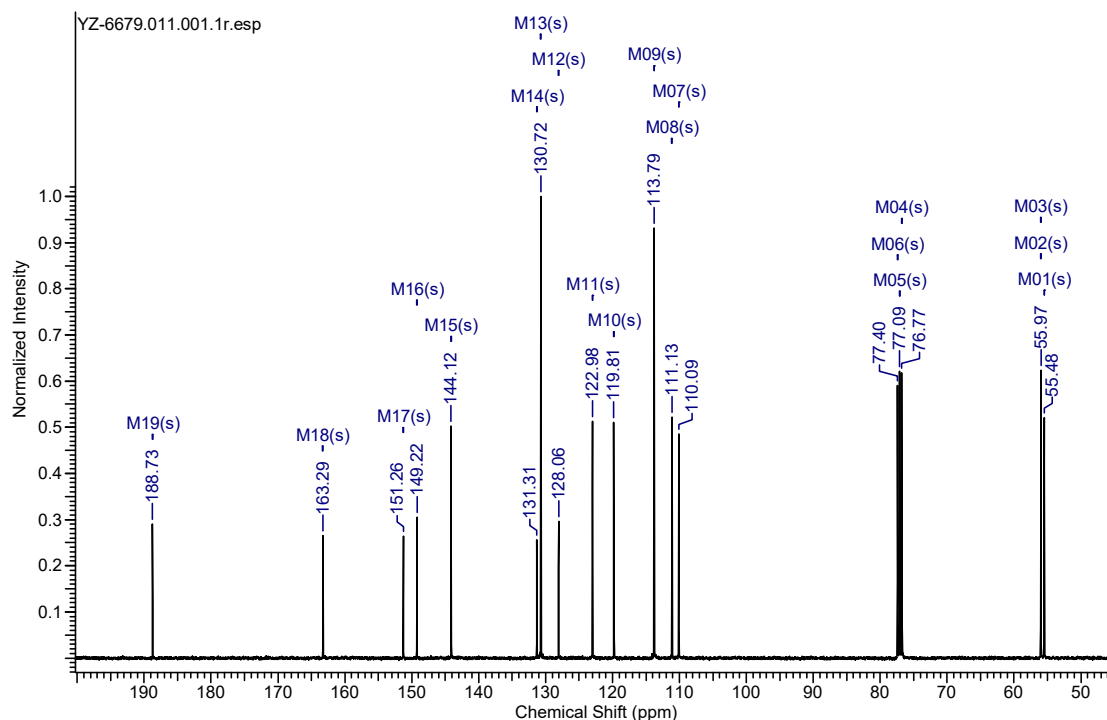

$^{13}\text{C}$  NMR (101 MHz, CHLOROFORM- $d$ )  $\delta$  188.7, 163.3, 151.3, 149.2, 144.1, 131.3, 130.7, 128.1, 123.0, 119.8, 113.8, 111.1, 110.1, 77.4, 77.1, 76.8, 56.0, 56.0, 55.5

**Figure S7.**  $^1\text{H}$  and  $^{13}\text{C}$  NMR spectra of

**(E)-1,3-bis(3,4-dimethoxyphenyl)prop-2-en-1-one(3g)<sup>1</sup>**

$^1\text{H}$  NMR (400 MHz, CHLOROFORM- $d$ )  $\delta$  ppm 3.90 - 3.97 (m, 12 H) 6.83 - 6.94 (m, 2 H) 7.17 (d,  $J=1.71$  Hz, 1 H) 7.20 - 7.26 (m, 1 H) 7.43 (d,  $J=15.65$  Hz, 1 H) 7.62 (d,  $J=1.96$  Hz, 1 H) 7.68 (dd,  $J=8.44, 2.08$  Hz, 1 H) 7.76 (d,  $J=15.65$  Hz, 1 H)

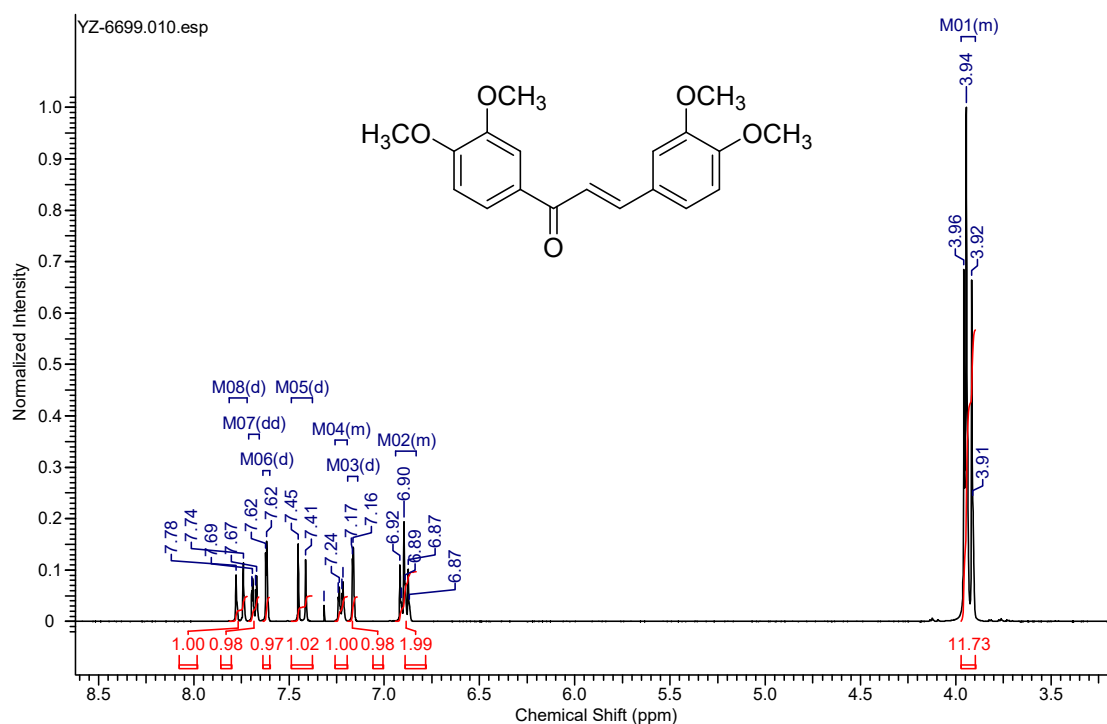

$^{13}\text{C}$  NMR (101 MHz, CHLOROFORM-*d*)  $\delta$  188.6, 153.1, 151.3, 149.2, 144.1, 131.5, 128.0, 122.9, 122.9, 119.6, 111.1, 110.8, 110.2, 109.9, 77.5, 77.2, 76.8, 56.0, 56.0

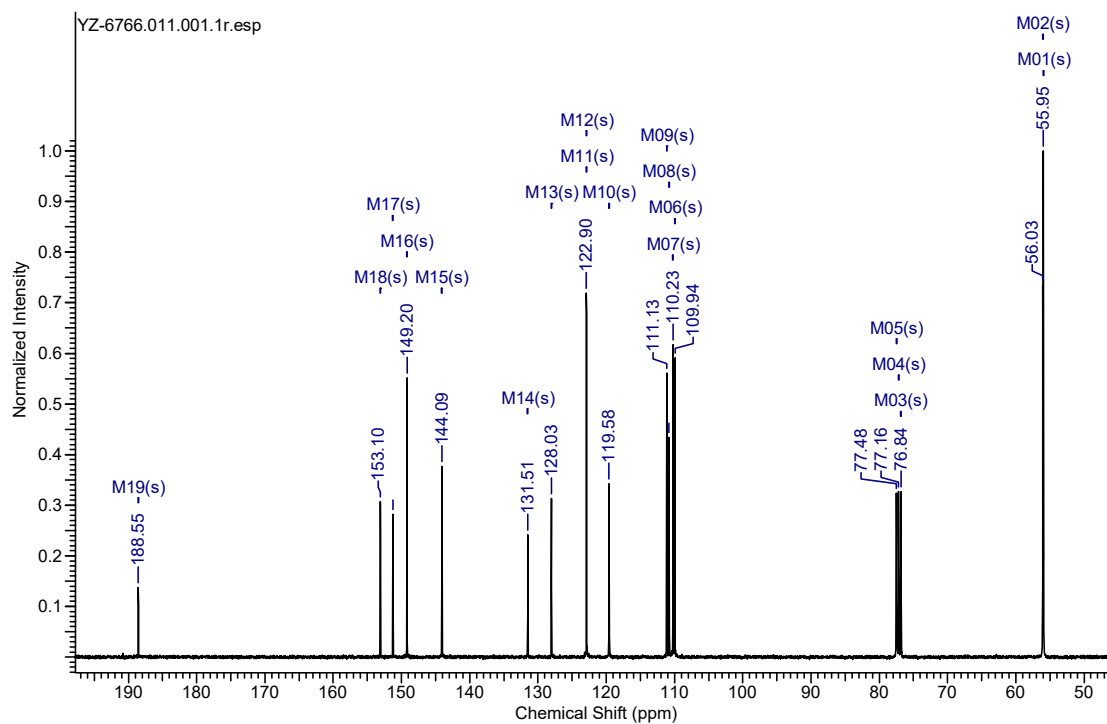

**Figure S8.**  $^1\text{H}$  and  $^{13}\text{C}$  NMR spectra of **(E)-3-(3,4-dimethoxyphenyl)-1-(3,4,5-trimethoxyphenyl)prop-2-en-1-one(3h)<sup>5</sup>**

$^1\text{H}$  NMR (400 MHz, CHLOROFORM-*d*)  $\delta$  ppm 3.90 - 3.96 (m, 15 H) 6.89 (d,  $J=8.31$  Hz, 1 H) 7.16 (d,  $J=1.71$  Hz, 1 H) 7.25 (dd,  $J=8.31, 1.96$  Hz, 1 H) 7.27 (s, 2 H) 7.36 (d,  $J=15.41$  Hz, 1 H) 7.76 (d,  $J=15.65$  Hz, 1 H)

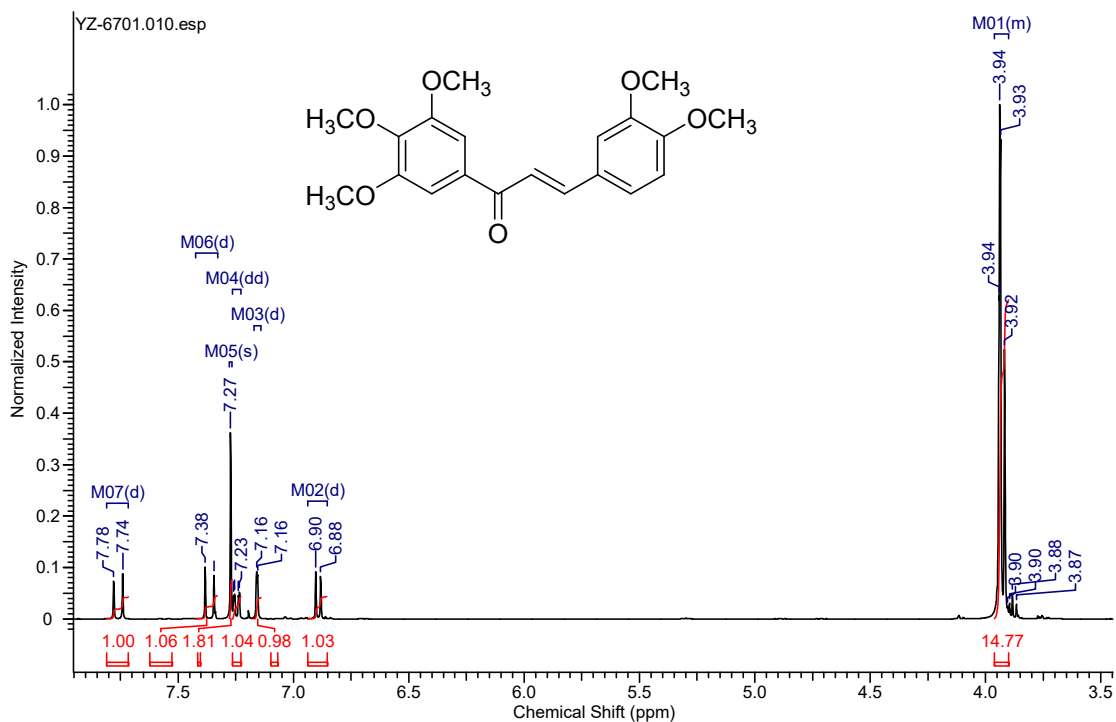

$^{13}\text{C}$  NMR (101 MHz, CHLOROFORM-*d*)  $\delta$  189.2, 189.2, 153.1, 151.4, 149.2, 144.8, 142.3, 133.7, 127.8, 122.9, 119.7, 111.1, 110.5, 106.1, 77.6, 77.2, 76.9, 60.9, 56.3, 55.9

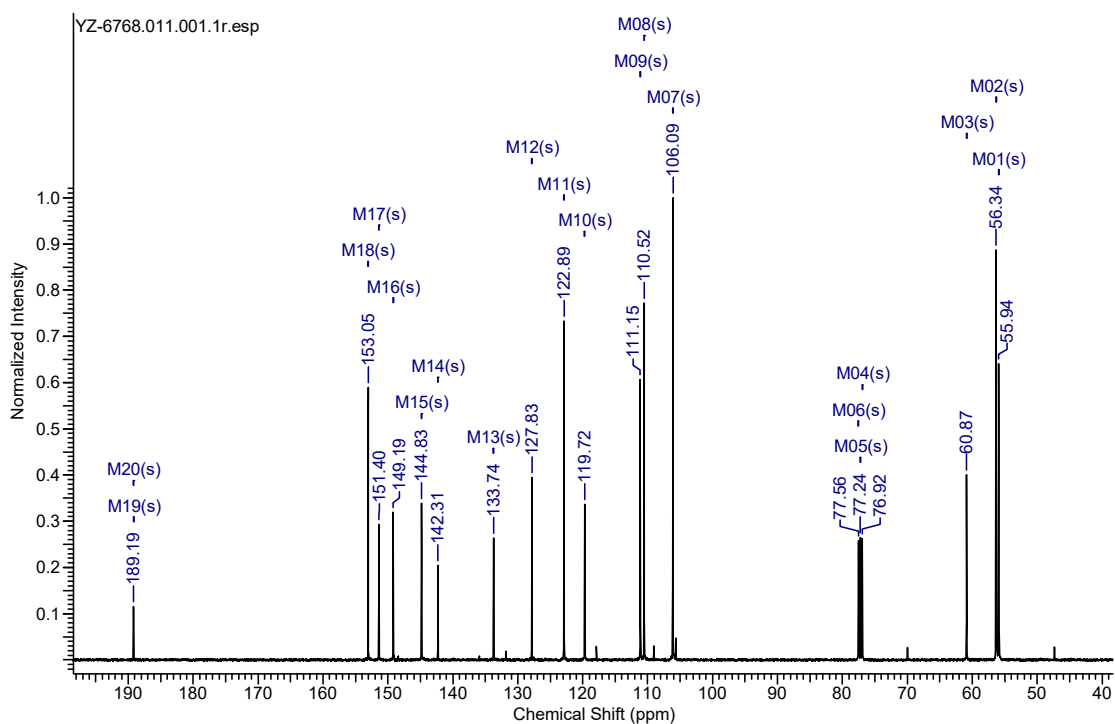

**Figure S9.**  $^1\text{H}$  and  $^{13}\text{C}$  NMR spectra of

**(E)-1-(3,5-difluorophenyl)-3-(3,4-dimethoxyphenyl)prop-2-en-1-one(3i)<sup>3</sup>**

$^1\text{H}$  NMR (400 MHz, CHLOROFORM-*d*)  $\delta$  ppm 3.94 (s, 3 H) 3.95 - 3.97 (m, 3 H)

6.91 (d,  $J=8.31$  Hz, 1 H) 7.02 (tt,  $J=8.50, 2.26$  Hz, 1 H) 7.16 (d,  $J=1.96$  Hz, 1 H) 7.22 - 7.29 (m, 2 H) 7.47 - 7.54 (m, 2 H) 7.79 (d,  $J=15.65$  Hz, 1 H)

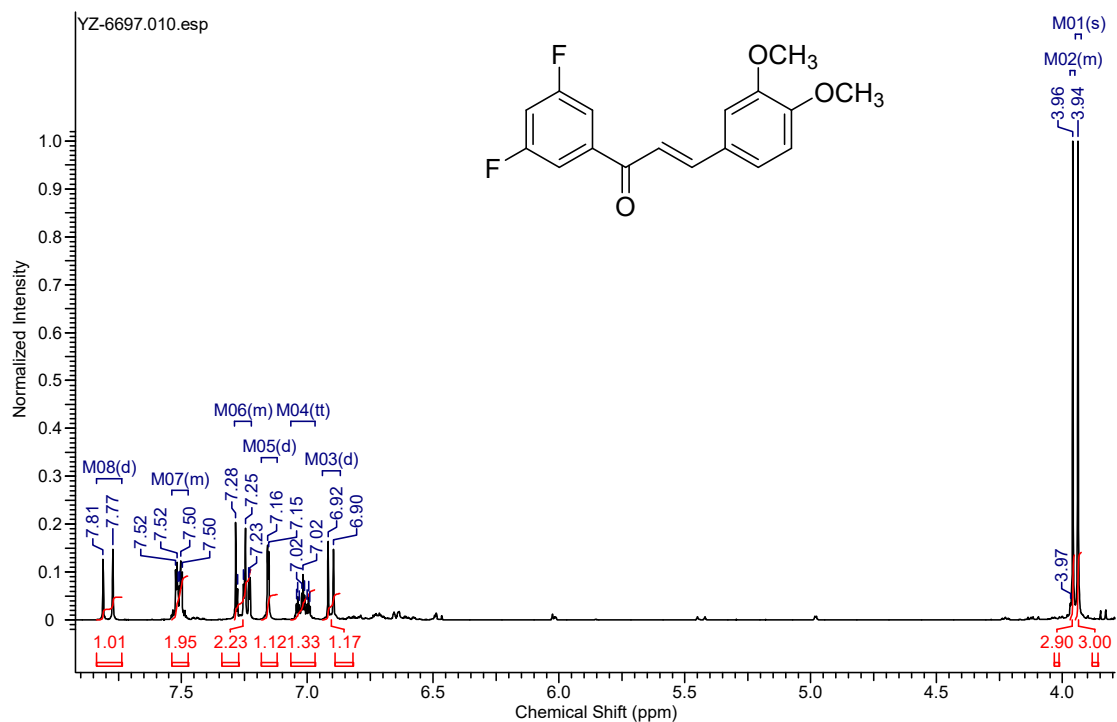

$^{13}\text{C}$  NMR (101 MHz, CHLOROFORM- $d$ )  $\delta$  187.8, 164.3, 164.2, 161.8, 161.7, 151.9, 149.4, 146.6, 141.5, 127.4, 123.7, 118.7, 111.4, 111.4, 111.3, 111.2, 110.2, 108.0, 107.8, 107.5, 77.4, 77.1, 76.7, 56.0, 56.0

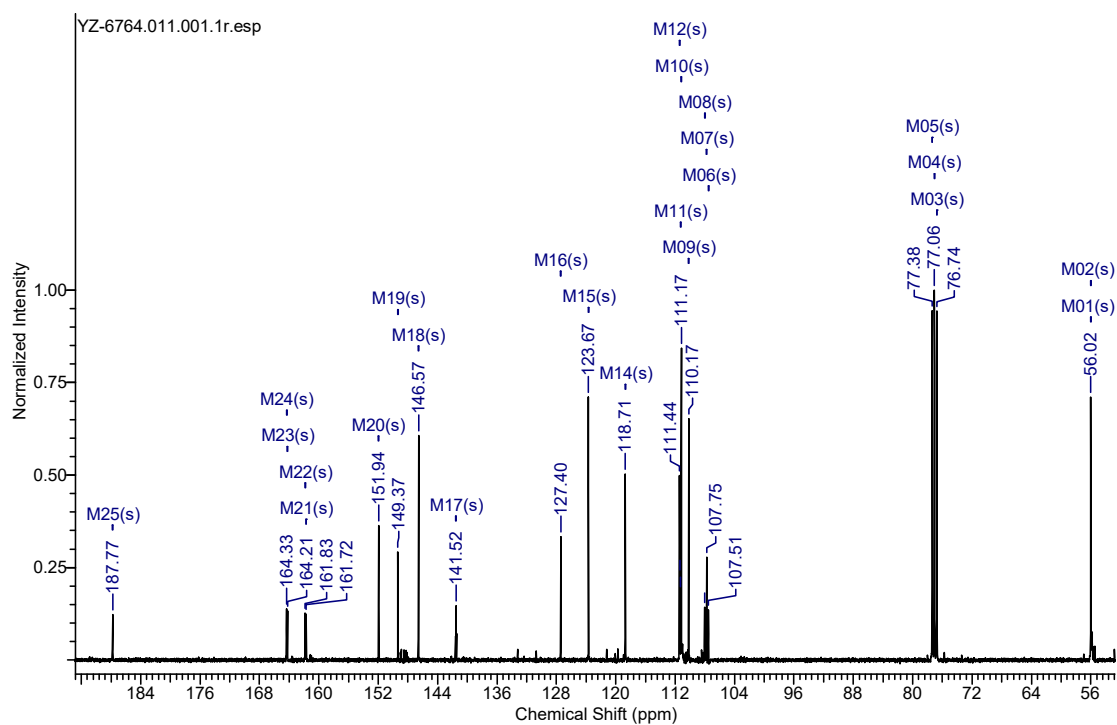

**Figure S10.**  $^1\text{H}$  and  $^{13}\text{C}$  NMR spectra of

**(E)-3-(3,4-dimethoxyphenyl)-1-(4-fluoro-3-methylphenyl)prop-2-en-1-one(3j)**

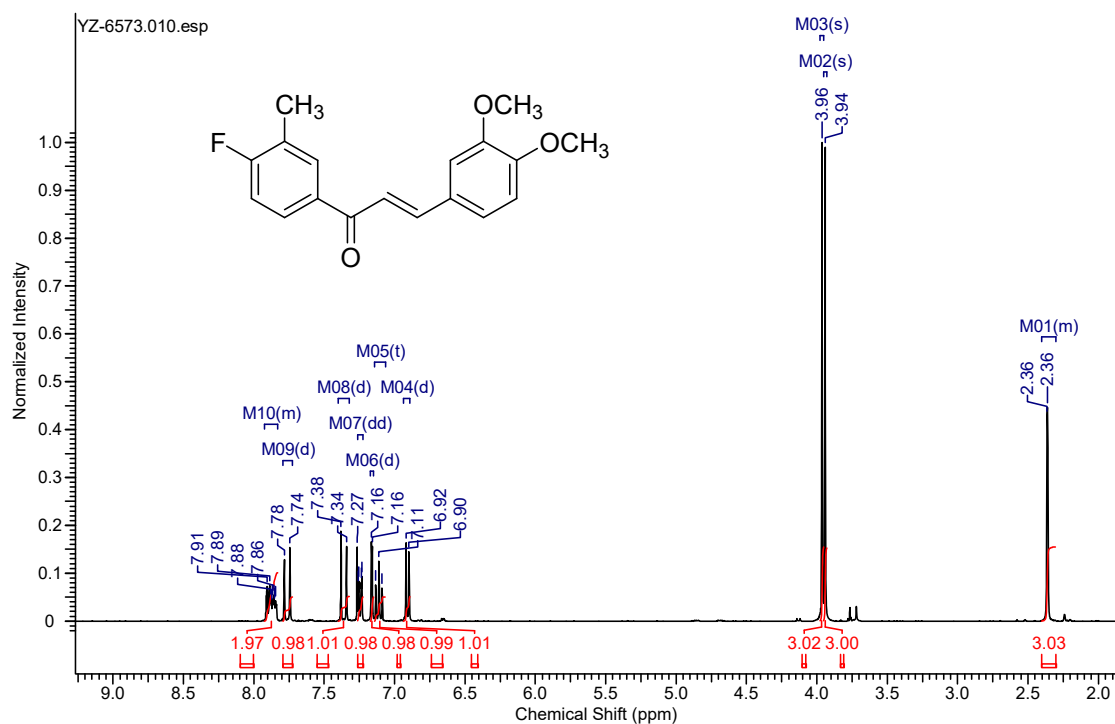

$^1\text{H}$  NMR (400 MHz, CHLOROFORM- $d$ )  $\delta$  7.83 - 7.92 (m, 2H), 7.76 (d,  $J$  = 15.65 Hz, 1H), 7.36 (d,  $J$  = 15.65 Hz, 1H), 7.25 (dd,  $J$  = 1.83, 8.19 Hz, 1H), 7.16 (d,  $J$  = 1.96 Hz, 1H), 7.11 (t,  $J$  = 8.93 Hz, 1H), 6.91 (d,  $J$  = 8.31 Hz, 1H), 3.96 (s, 3H), 3.94 (s, 3H), 2.30 - 2.40 (m, 3H)

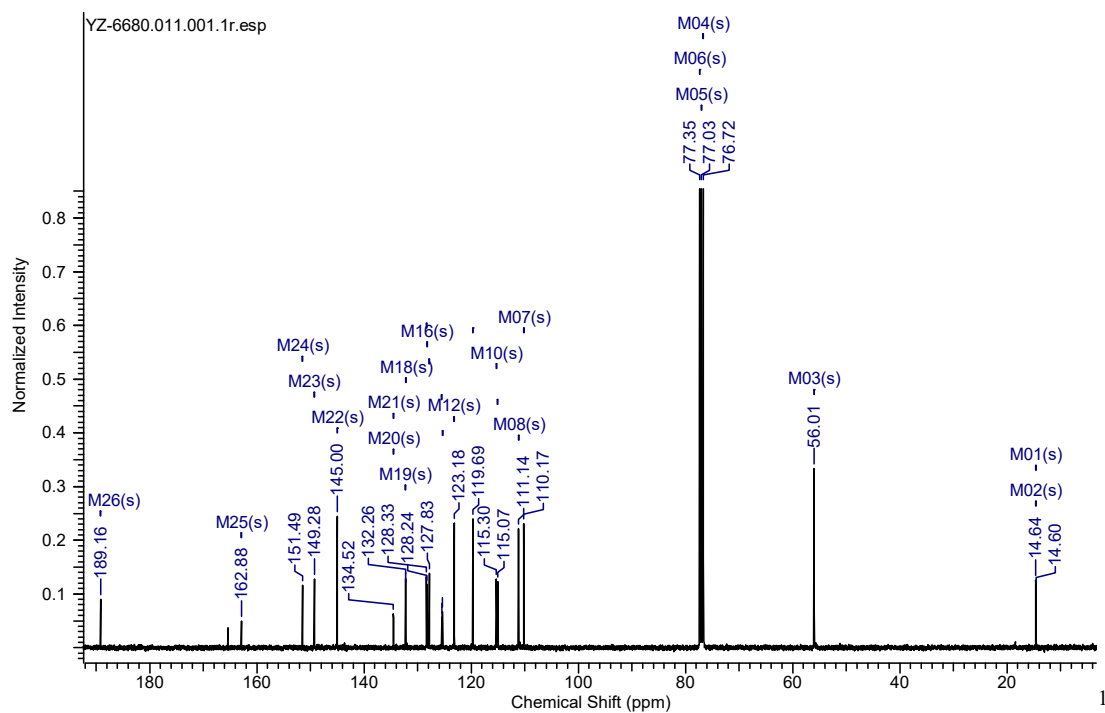

$^{13}\text{C}$  NMR (101 MHz, CHLOROFORM- $d$ )  $\delta$  189.2, 162.9, 151.5, 149.3, 145.0, 134.5, 134.5, 132.3, 132.2, 128.3, 128.2, 127.8, 125.5, 125.3, 123.2, 119.7, 115.3, 115.1,

111.1, 110.2, 77.4, 77.0, 76.7, 56.0, 14.6, 14.6

**Figure S11.**  $^1\text{H}$  and  $^{13}\text{C}$  NMR spectra of

**(E)-1-(4-methoxyphenyl)-3-(3,4,5-trimethoxyphenyl)prop-2-en-1-one(3k)<sup>6</sup>**

$^1\text{H}$  NMR (400 MHz, CHLOROFORM-*d*)  $\delta$  ppm 3.86 (s, 3 H) 3.88 - 3.94 (m, 9 H) 6.86 (s, 2 H) 6.92 - 7.01 (m, 2 H) 7.44 (d,  $J=15.65$  Hz, 1 H) 7.70 (d,  $J=15.65$  Hz, 1 H) 7.99 - 8.09 (m, 2 H)

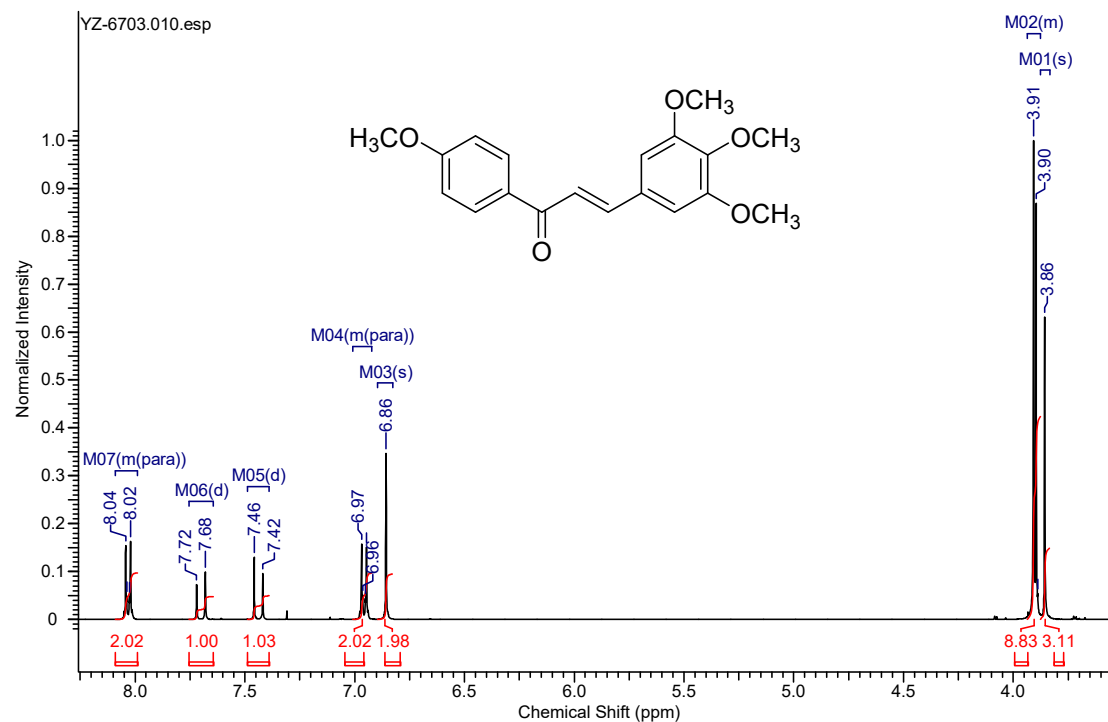

$^{13}\text{C}$  NMR (101 MHz, CHLOROFORM-*d*)  $\delta$  188.5, 163.4, 153.4, 144.1, 140.3, 131.1, 130.8, 130.6, 121.2, 113.8, 105.6, 77.5, 77.2, 76.9, 60.9, 56.2, 55.4

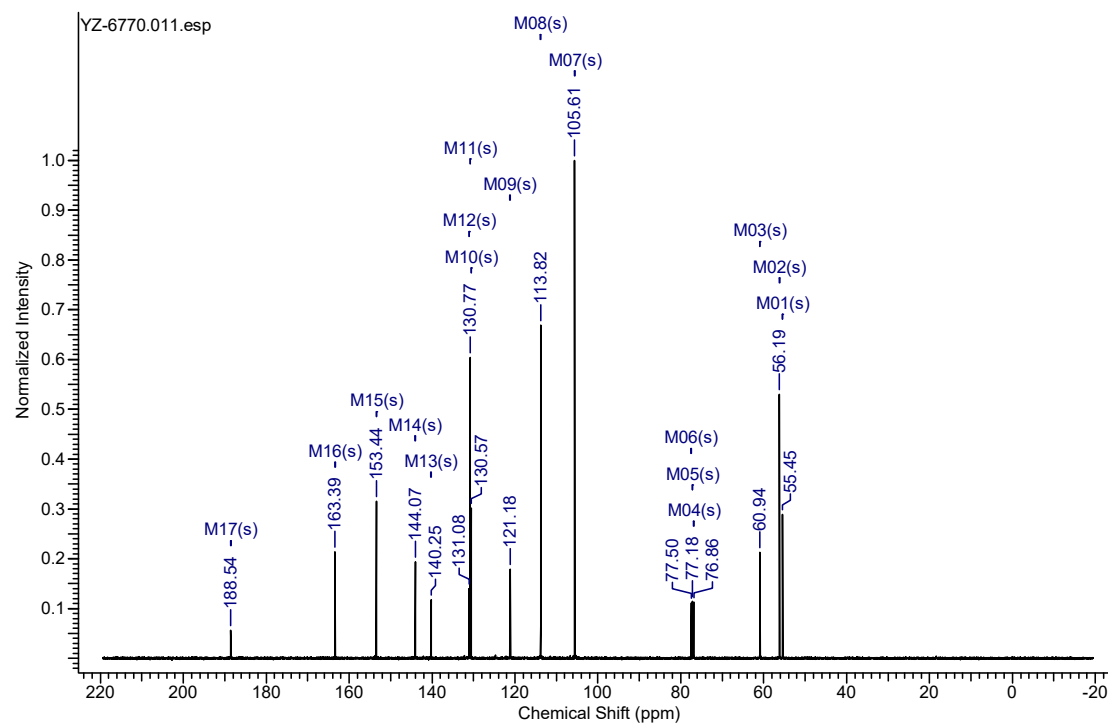

**Figure S12.**  $^1\text{H}$  and  $^{13}\text{C}$  NMR spectra of

**(E)-1-(3,4-dimethoxyphenyl)-3-(3,4,5-trimethoxyphenyl)prop-2-en-1-one(3I)<sup>2</sup>**

$^1\text{H}$  NMR (400 MHz, CHLOROFORM-*d*)  $\delta$  7.67 - 7.76 (m, 2H), 7.62 (d,  $J = 1.96$  Hz, 1H), 7.45 (d,  $J = 15.65$  Hz, 1H), 6.85 - 6.94 (m, 3H), 3.88 - 3.98 (m, 15H)

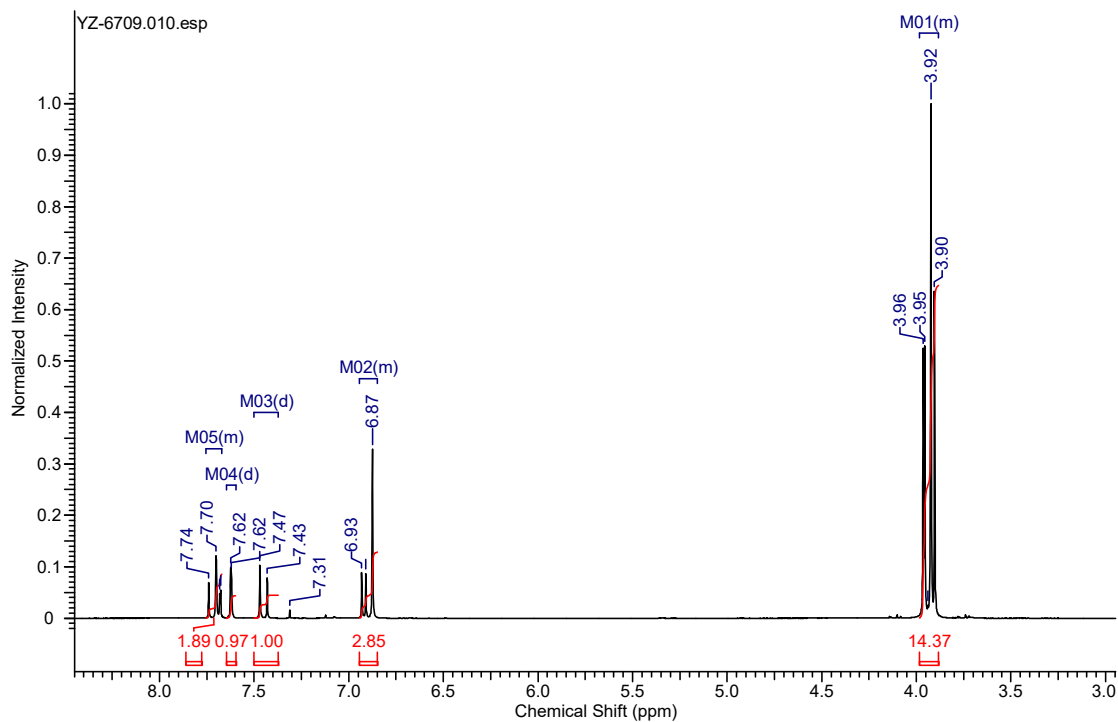

$^{13}\text{C}$  NMR (101 MHz, CHLOROFORM-*d*)  $\delta$  188.4, 153.4, 153.2, 149.2, 144.0, 140.3, 131.3, 130.5, 123.0, 121.0, 110.8, 110.0, 105.6, 77.5, 77.2, 76.9, 60.9, 56.2, 56.0

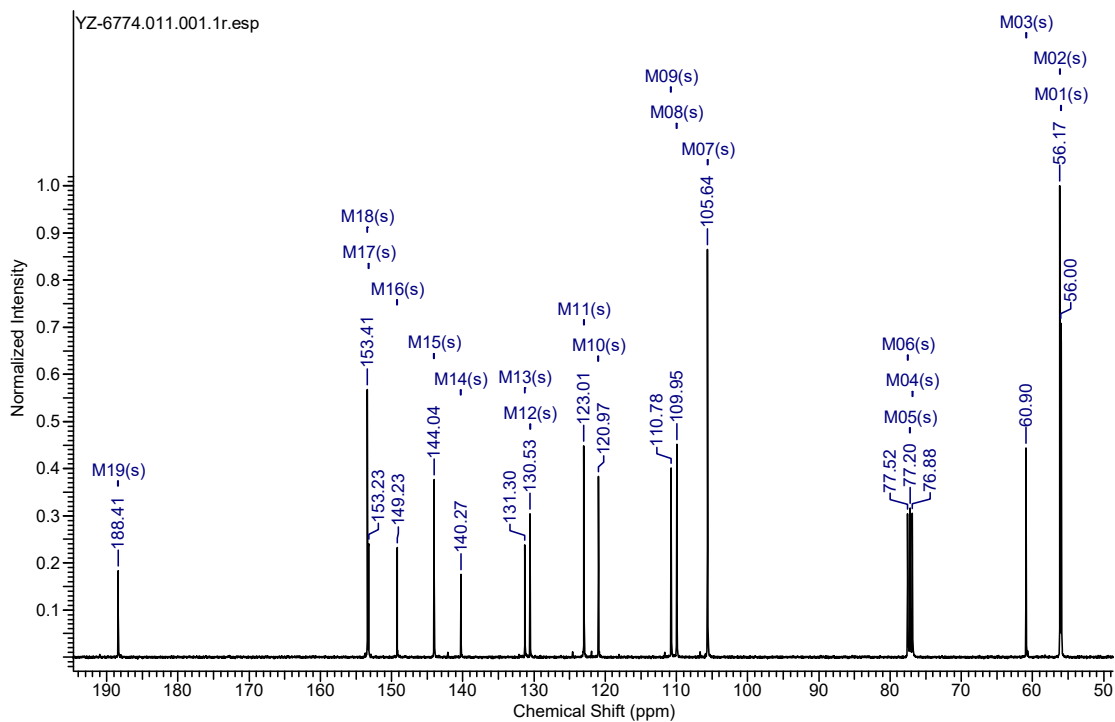

**Figure S13**  $^1\text{H}$  and  $^{13}\text{C}$  NMR spectra of  
**(E)-1,3-bis(3,4,5-trimethoxyphenyl)prop-2-en-1-one(3m)<sup>7</sup>**

$^1\text{H}$  NMR (400 MHz, CHLOROFORM-*d*)  $\delta$  ppm 3.89 - 3.98 (m, 18 H) 6.87 (s, 2 H)  
7.26 (s, 2 H) 7.36 (d,  $J=15.41$  Hz, 1 H) 7.72 (d,  $J=15.41$  Hz, 1 H)

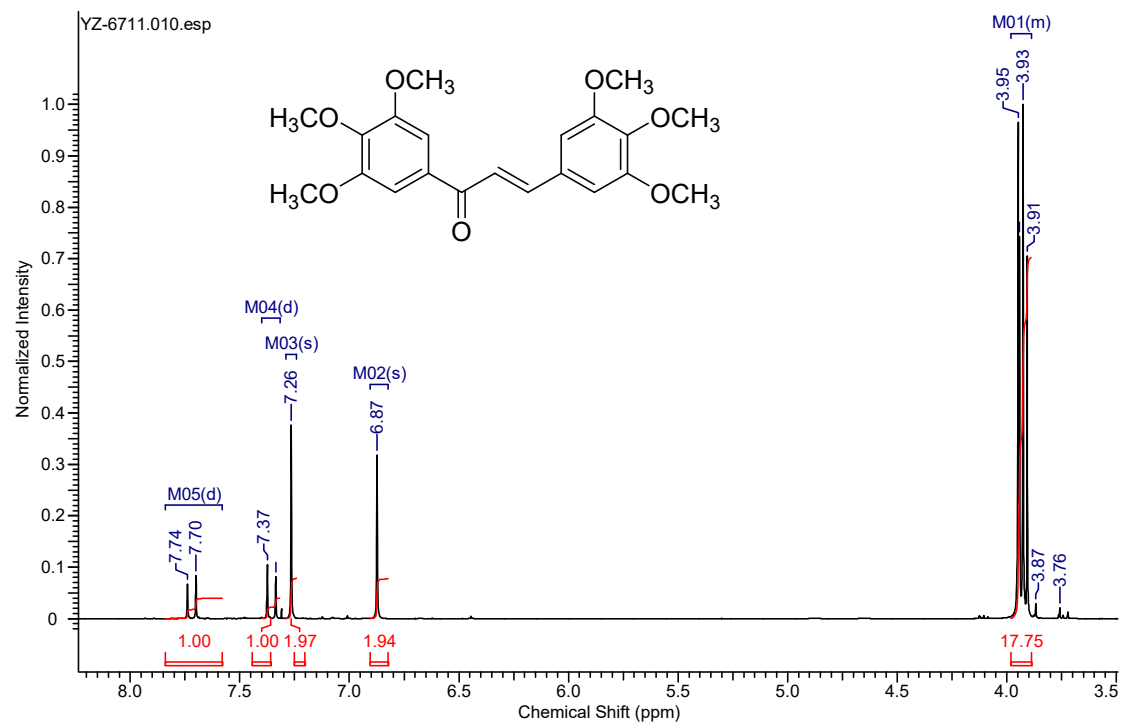

$^{13}\text{C}$  NMR (101 MHz, CHLOROFORM-*d*)  $\delta$  189.3, 153.5, 153.1, 144.9, 142.5, 140.5, 133.6, 130.4, 121.3, 106.3, 105.8, 77.5, 77.2, 76.9, 60.9, 60.9, 56.4, 56.2

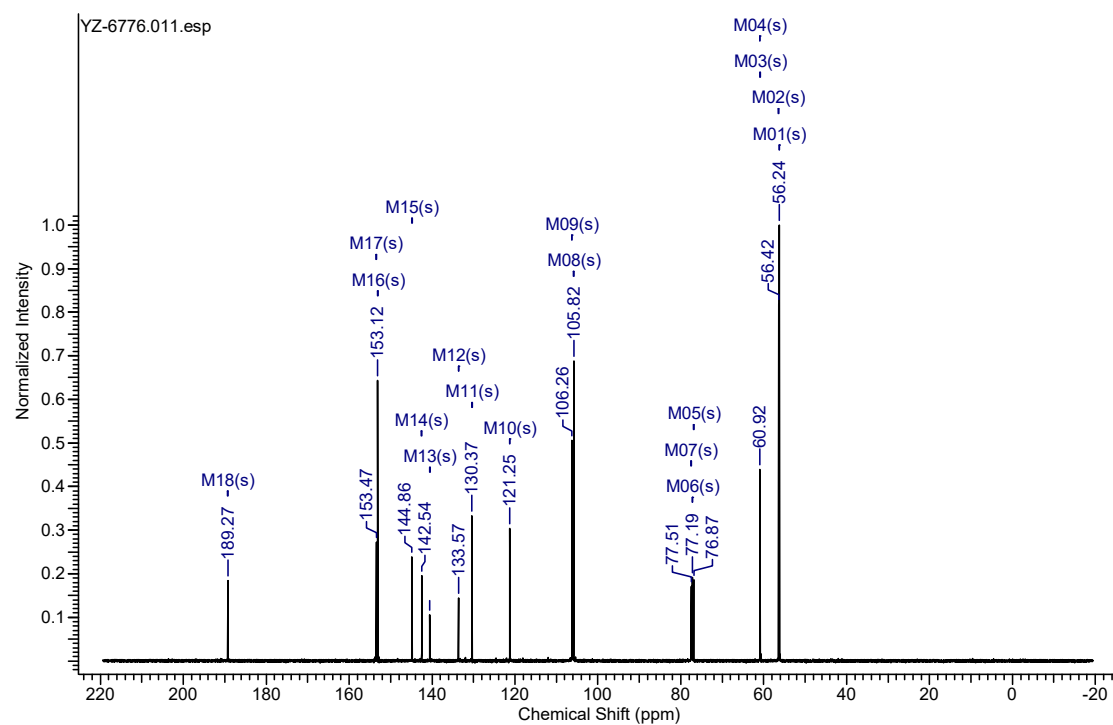



**Figure S14.**  $^1\text{H}$  and  $^{13}\text{C}$  NMR spectra of

**(E)-1-(4-fluoro-3-methylphenyl)-3-(3,4,5-trimethoxyphenyl)prop-2-en-1-one(3n)**

$^1\text{H}$  NMR (400 MHz,  $\text{CHLOROFORM-}d$ )  $\delta$  ppm 2.36 (d,  $J=1.71$  Hz, 3 H) 3.88 - 3.96 (m, 9 H) 6.87 (s, 2 H) 7.11 (t,  $J=8.80$  Hz, 1 H) 7.37 (d,  $J=15.41$  Hz, 1 H) 7.71 (d,  $J=15.41$  Hz, 1 H) 7.81 - 7.94 (m, 2 H)

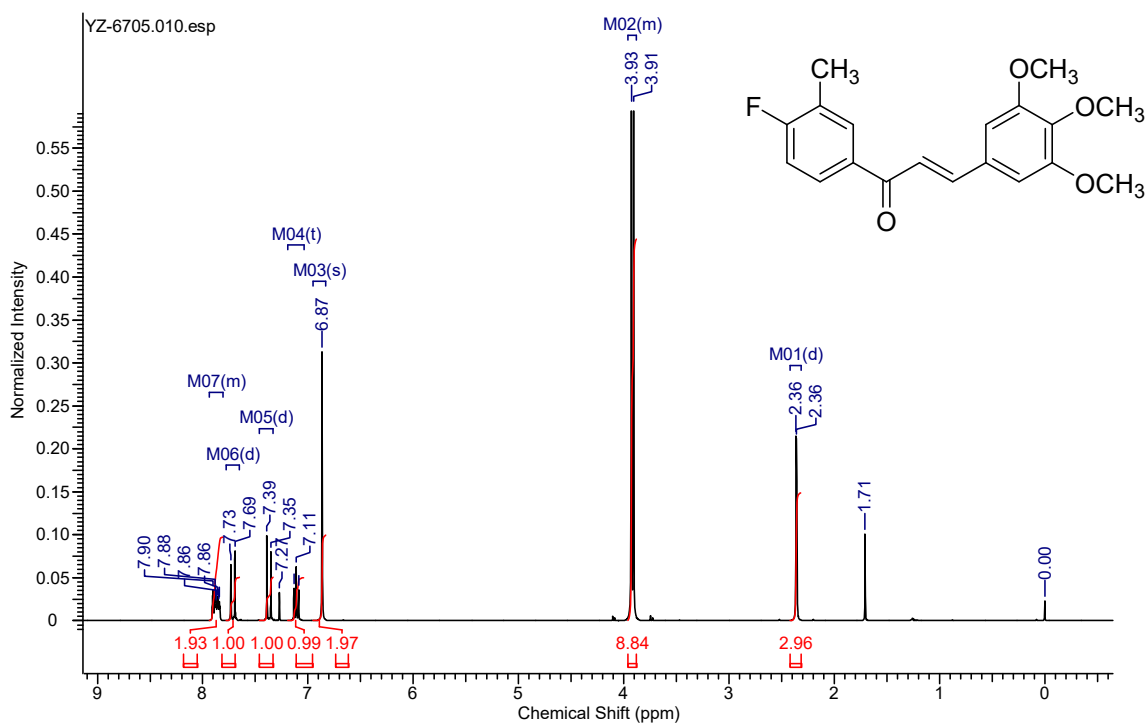

$^{13}\text{C}$  NMR (101 MHz,  $\text{CHLOROFORM-}d$ )  $\delta$  189.0, 165.5, 162.9, 153.5, 145.0, 140.6, 134.3, 134.3, 132.3, 132.2, 130.3, 128.4, 128.3, 125.6, 125.4, 121.1, 115.3, 115.1, 105.8, 77.4, 77.3, 77.1, 76.7, 61.0, 56.3, 14.6, 14.6

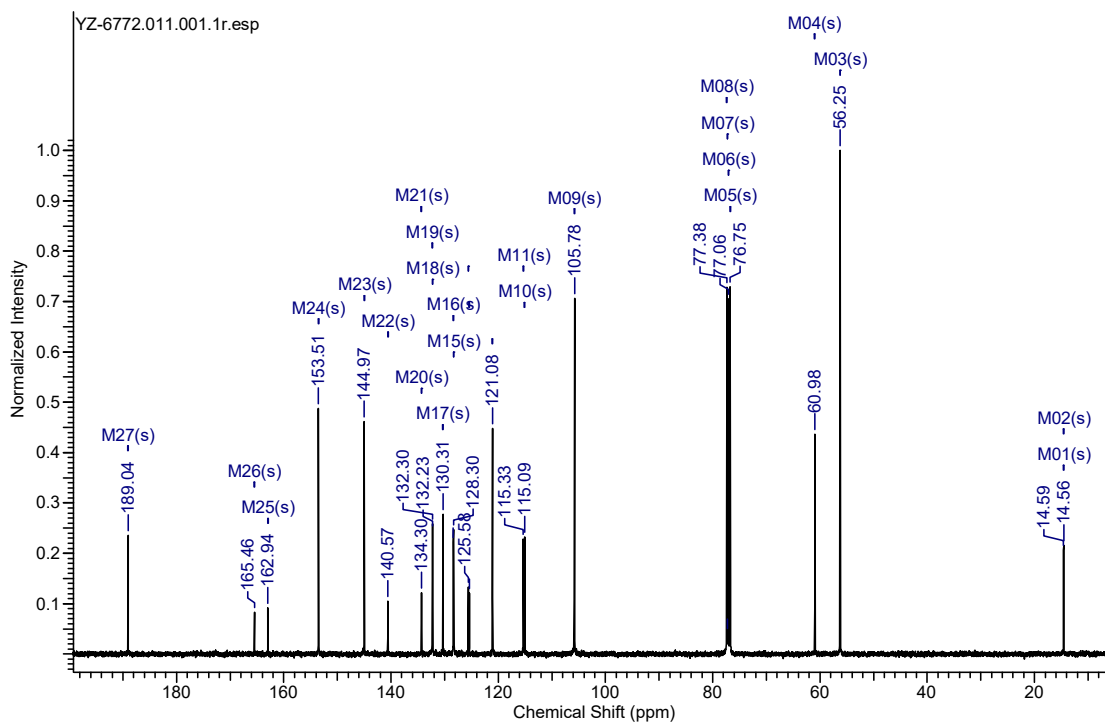

**Figure S15.**  $^1\text{H}$  and  $^{13}\text{C}$  NMR spectra of **1,3-bis(4-methoxyphenyl)propan-1-one(4a)<sup>2</sup>**

$^1\text{H}$  NMR (400 MHz, CHLOROFORM-*d*)  $\delta$  ppm 2.89 - 3.05 (m, 2 H) 3.15 - 3.27 (m, 2 H) 3.76 (s, 3 H) 3.84 (s, 3 H) 6.78 - 6.87 (m, 2 H) 6.87 - 6.95 (m, 2 H) 7.11 - 7.19 (m, 2 H) 7.88 - 7.96 (m, 2 H)

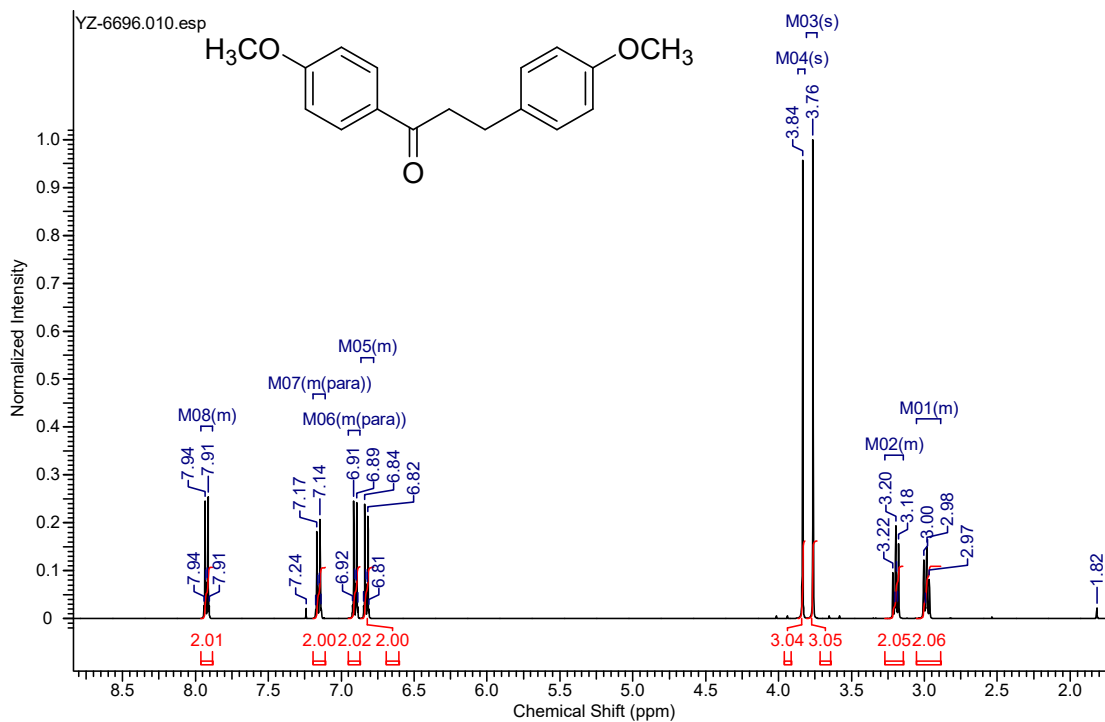

$^{13}\text{C}$  NMR (101 MHz, CHLOROFORM-*d*)  $\delta$  198.0, 163.5, 158.0, 133.5, 130.3, 130.1, 129.4, 114.0, 113.7, 77.4, 77.1, 76.8, 55.5, 55.3, 40.4, 29.5

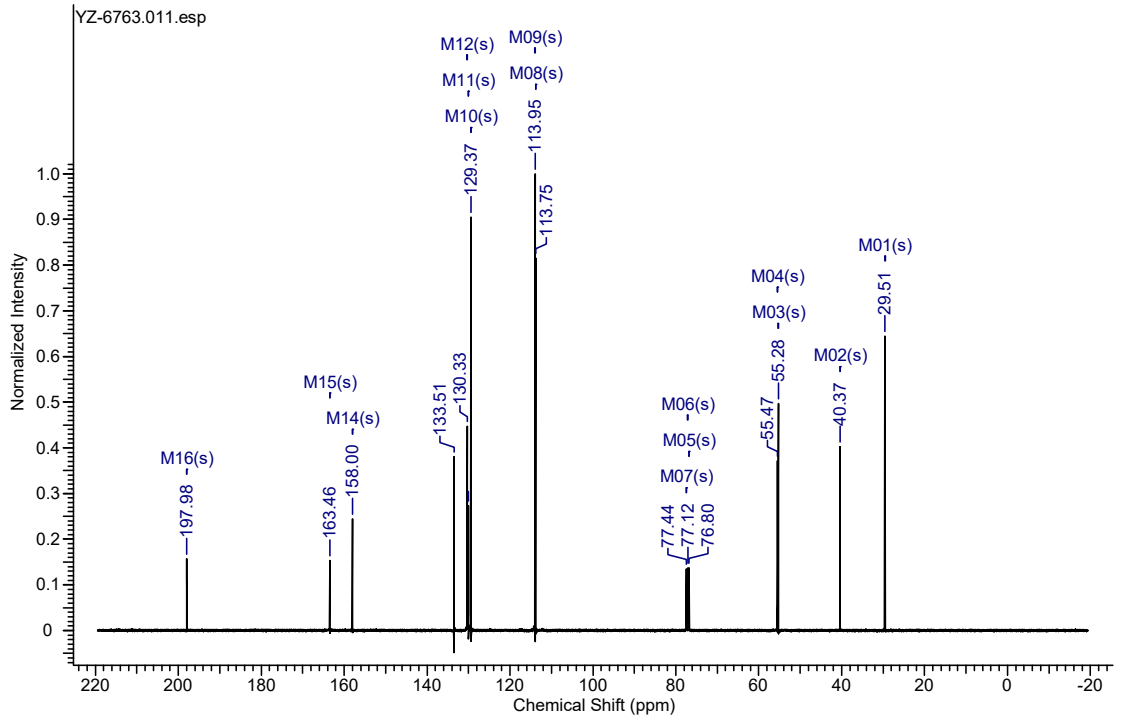

**Figure S16.**  $^1\text{H}$  and  $^{13}\text{C}$  NMR spectra of **1-(3,4-dimethoxyphenyl)-3-(4-methoxyphenyl)propan-1-one(4b)<sup>1</sup>**

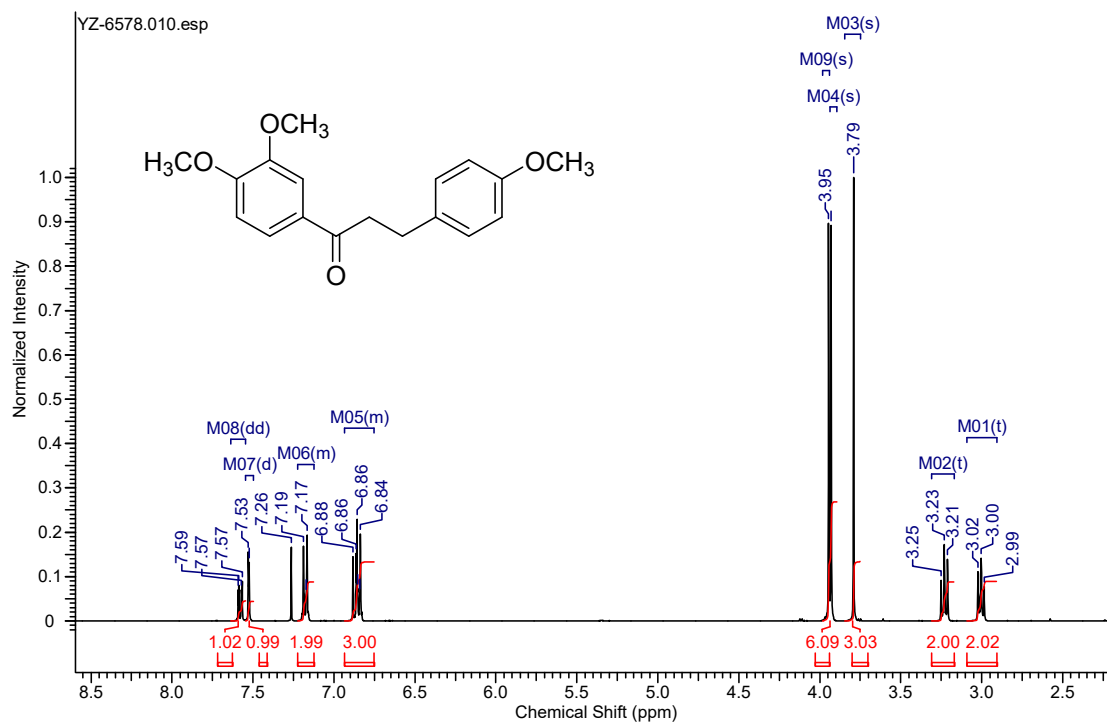

$^1\text{H}$  NMR (400 MHz, CHLOROFORM-*d*)  $\delta$  7.58 (dd,  $J = 1.96$ , 8.56 Hz, 1H), 7.53 (d,  $J = 1.96$  Hz, 1H), 7.12 - 7.23 (m, 2H), 6.75 - 6.94 (m, 3H), 3.93 (s, 3H), 3.95 (s, 3H), 3.79 (s, 3H), 3.23 (t,  $J = 7.70$  Hz, 2H), 3.00 (t,  $J = 7.70$  Hz, 2H)

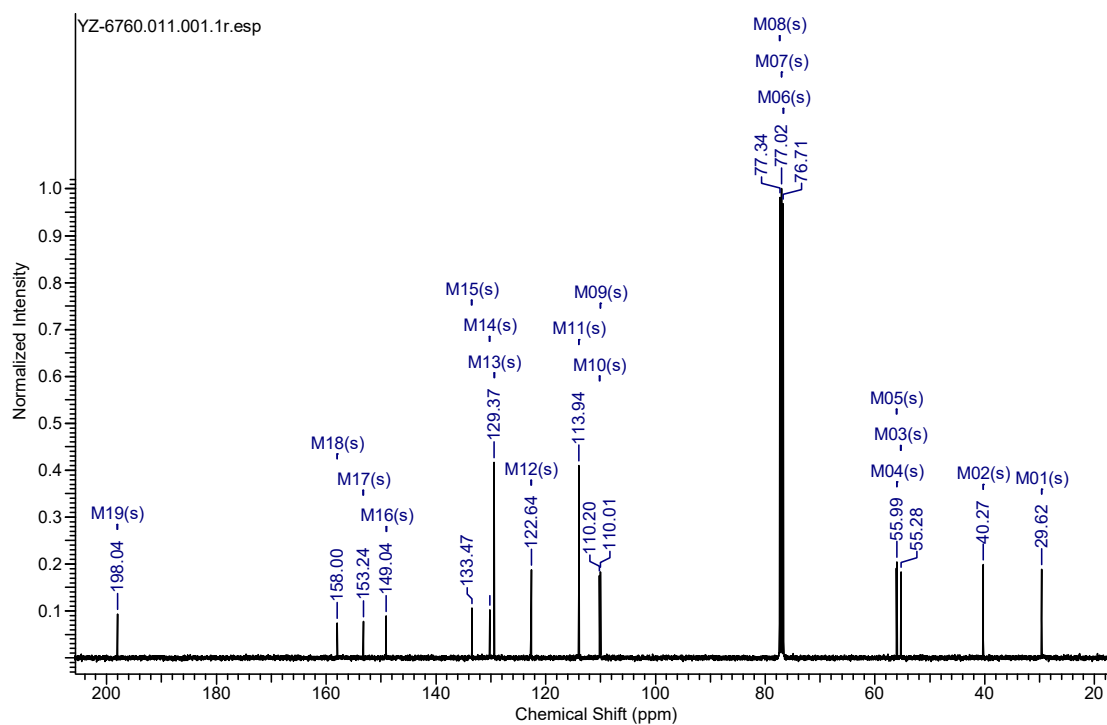

$^{13}\text{C}$  NMR (101 MHz, CHLOROFORM-*d*)  $\delta$  198.0, 158.0, 153.2, 149.0, 133.5, 130.2, 129.4, 122.6, 113.9, 110.2, 110.0, 77.3, 77.0, 76.7, 56.1, 56.0, 55.3, 40.3, 29.6

**Figure S17.**  $^1\text{H}$  and  $^{13}\text{C}$  NMR spectra of **3-(4-methoxyphenyl)-1-(3,4,5-trimethoxyphenyl)propan-1-one(4c)<sup>2</sup>**

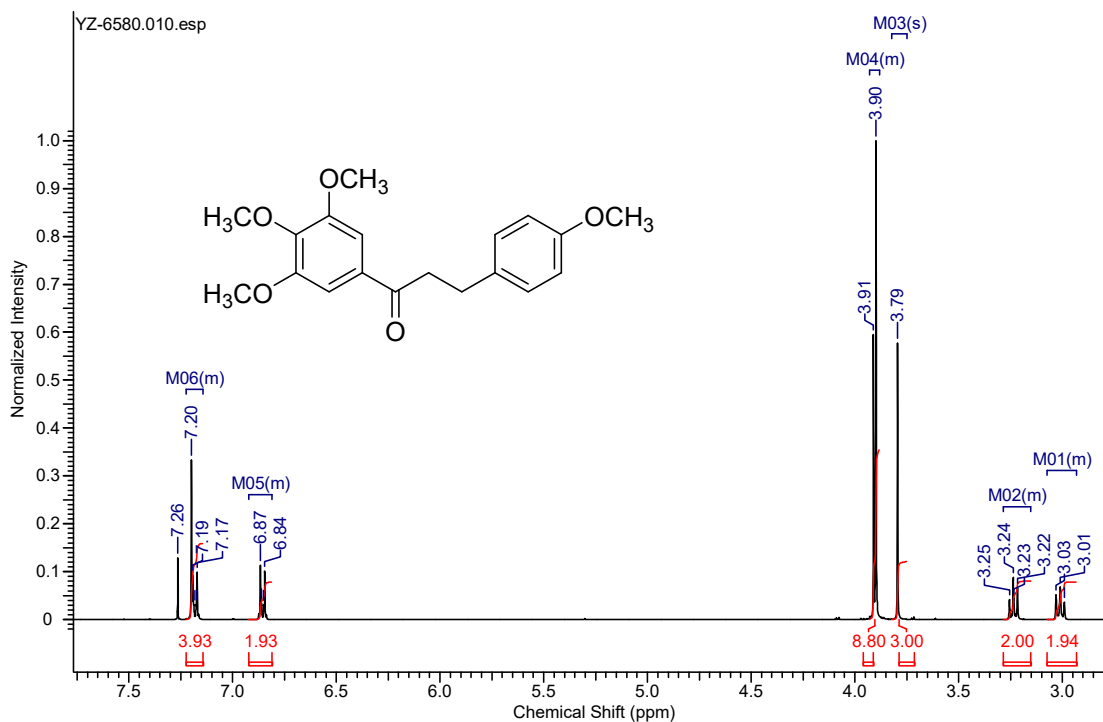

$^1\text{H}$  NMR (400 MHz, CHLOROFORM-*d*)  $\delta$  7.14 - 7.22 (m, 4H), 6.81 - 6.92 (m, 2H), 3.88 - 3.93 (m, 9H), 3.79 (s, 3H), 3.15 - 3.28 (m, 2H), 2.93 - 3.07 (m, 2H)

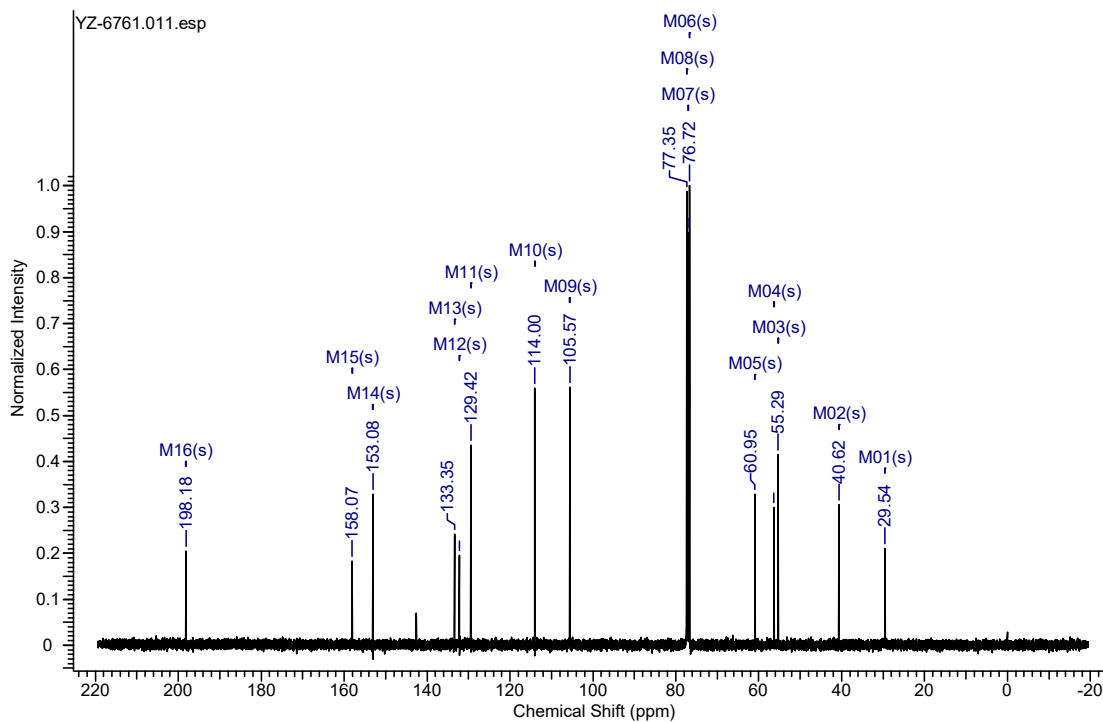

$^{13}\text{C}$  NMR (101 MHz, CHLOROFORM-*d*)  $\delta$  198.2, 158.1, 153.1, 133.3, 132.2, 129.4, 114.0, 105.6, 77.3, 77.0, 76.7, 61.0, 56.3, 55.3, 40.6, 29.5

**Figure S18.**  $^1\text{H}$  and  $^{13}\text{C}$  NMR spectra of

**1-(3,5-difluorophenyl)-3-(4-methoxyphenyl)propan-1-one(4d)**

$^1\text{H}$  NMR (400 MHz, CHLOROFORM- $d$ )  $\delta$  7.38 - 7.49 (m, 2H), 7.12 - 7.19 (m, 2H), 7.00 (tt,  $J = 2.32, 8.44$  Hz, 1H), 6.81 - 6.87 (m, 2H), 3.79 (s, 3H), 3.16 - 3.24 (m, 2H), 2.97 - 3.03 (m, 2H)

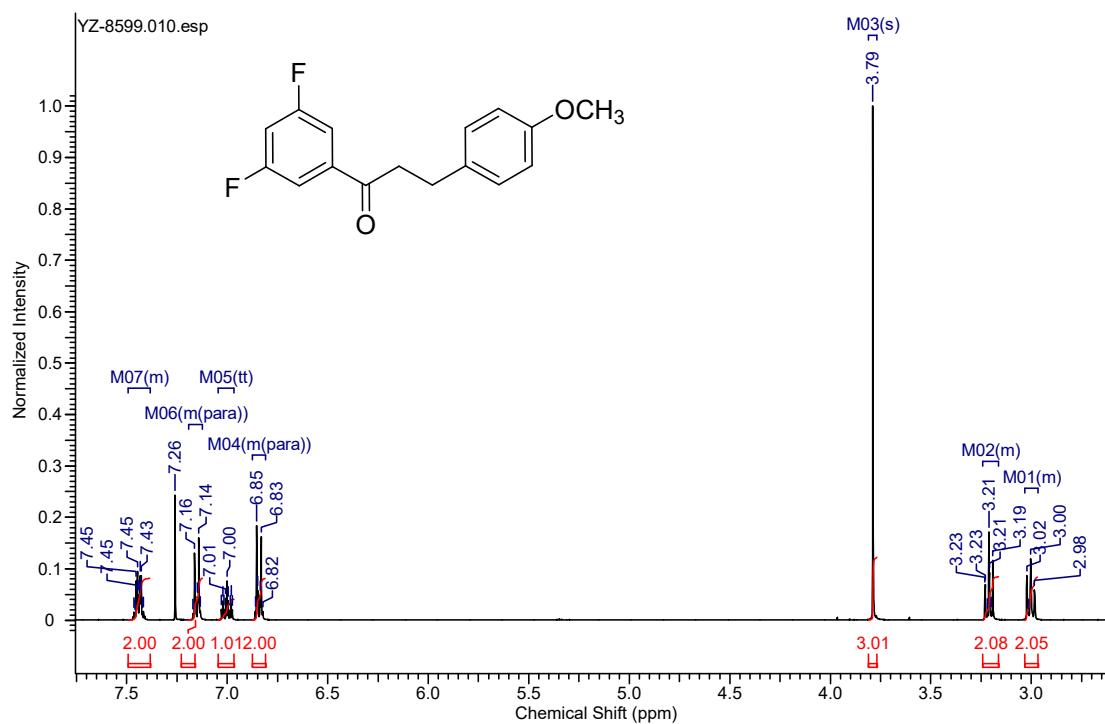

$^{13}\text{C}$  NMR (101 MHz, CHLOROFORM- $d$ )  $\delta$  196.7, 196.7, 164.4, 164.2, 161.9, 161.8, 158.2, 139.8, 132.7, 129.4, 114.0, 111.1, 111.0, 110.9, 110.9, 108.5, 108.3, 108.0, 77.4, 77.1, 76.7, 55.3, 40.8, 29.0

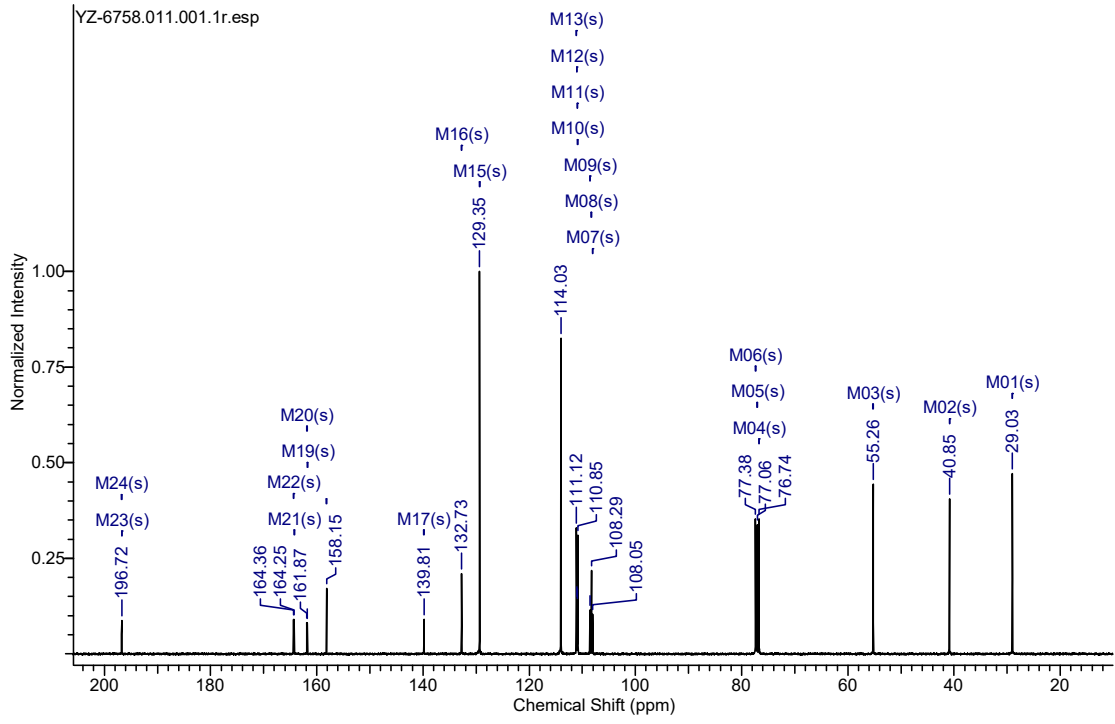

**Figure S19.**  $^1\text{H}$  and  $^{13}\text{C}$  NMR spectra of

**1-(4-fluoro-3-methylphenyl)-3-(4-methoxyphenyl)propan-1-one(4e)**

$^1\text{H}$  NMR (400 MHz, CHLOROFORM- $d$ )  $\delta$  7.72 - 7.89 (m, 2H), 7.12 - 7.21 (m, 2H), 7.04 (t,  $J = 8.80$  Hz, 1H), 6.77 - 6.91 (m, 2H), 3.78 (s, 3H), 3.15 - 3.28 (m, 2H), 2.91 - 3.06 (m, 2H), 2.30 (d,  $J = 1.71$  Hz, 3H)

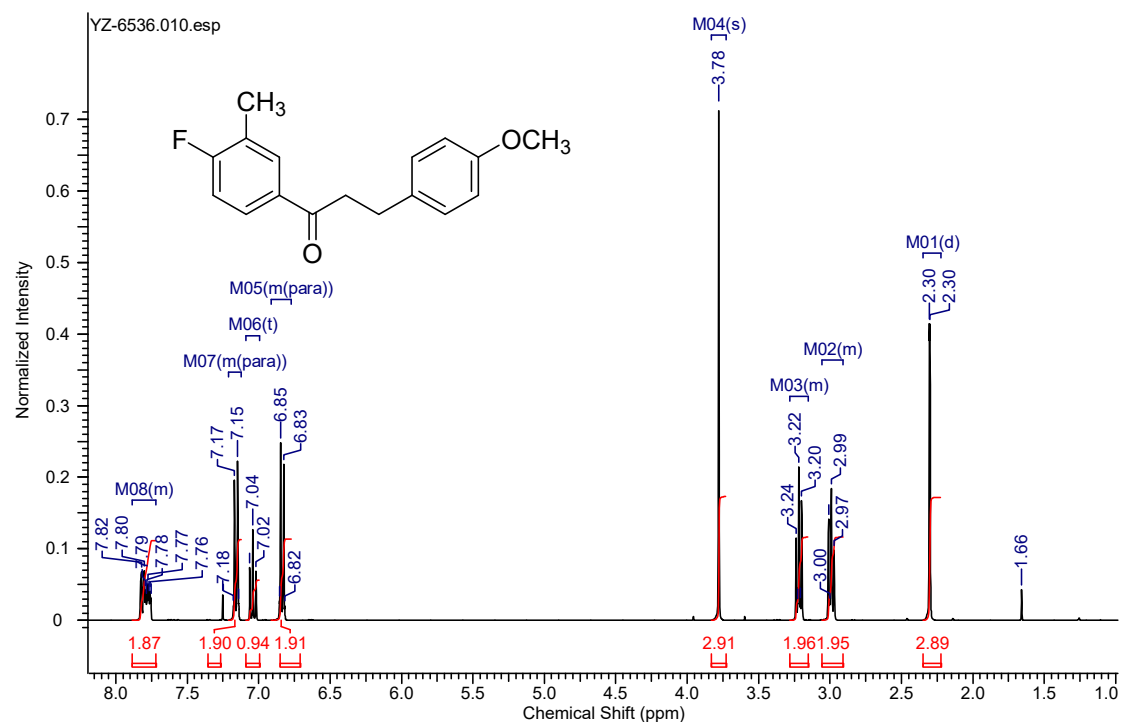

$^{13}\text{C}$  NMR (101 MHz, CHLOROFORM- $d$ )  $\delta$  198.1, 163.1, 158.0, 133.3, 133.1, 133.0, 131.9, 131.9, 129.4, 128.0, 127.9, 125.4, 125.3, 115.4, 115.1, 113.9, 77.4, 77.1, 76.8, 55.3, 40.7, 29.3, 14.6, 14.6

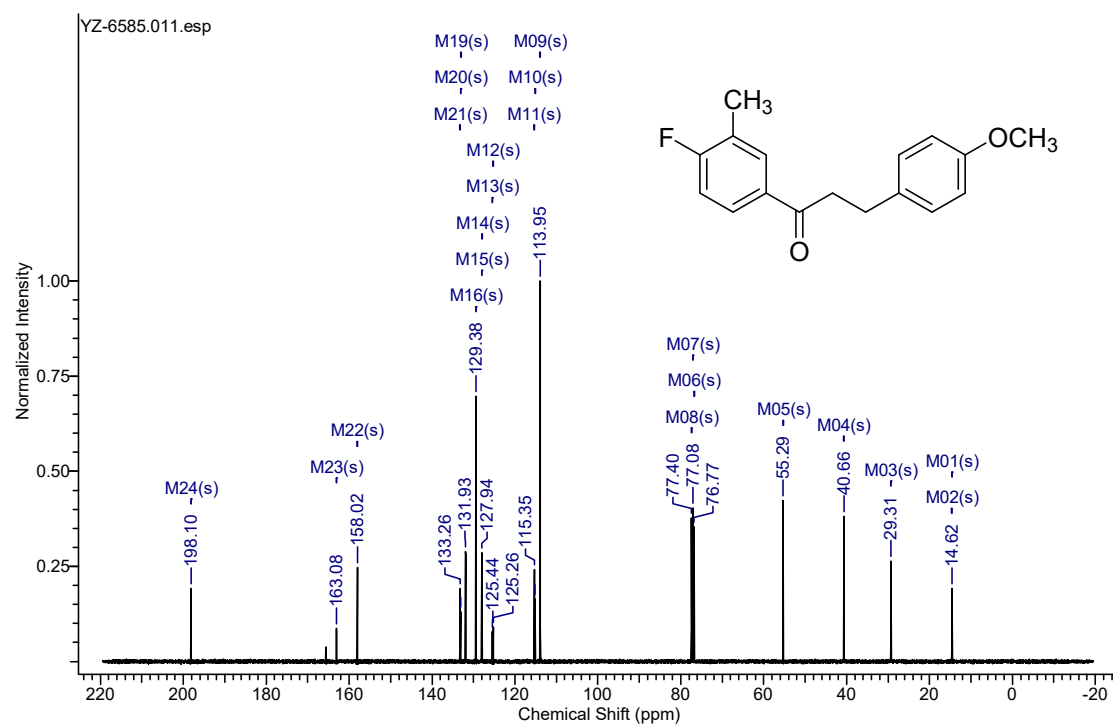



**Figure S20.**  $^1\text{H}$  and  $^{13}\text{C}$  NMR spectra of **3-(3,4-dimethoxyphenyl)-1-(4-methoxyphenyl)propan-1-one(4f)<sup>8</sup>**

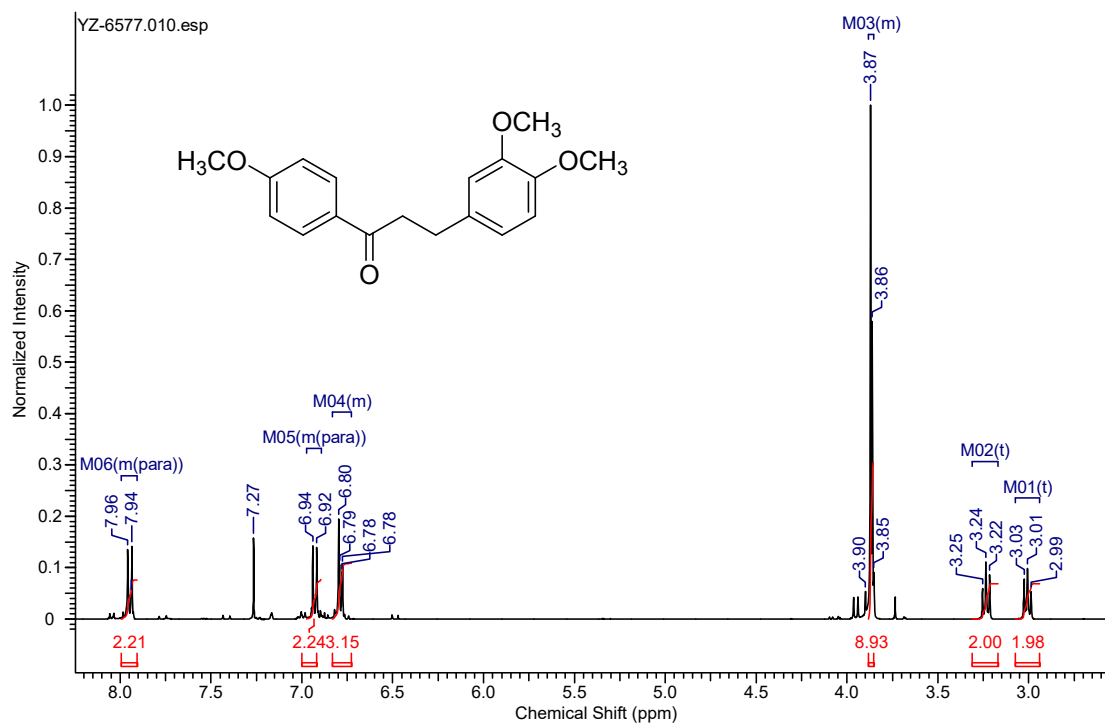

$^1\text{H}$  NMR (400 MHz,  $\text{CHCl}_3$ -d)  $\delta$  7.91 - 7.99 (m, 2H), 6.89 - 6.98 (m,  $J = 8.80$  Hz, 2H), 6.73 - 6.83 (m, 3H), 3.85 - 3.88 (m, 9H), 3.23 (t,  $J = 7.70$  Hz, 2H), 3.01 (t,  $J = 7.70$  Hz, 2H)

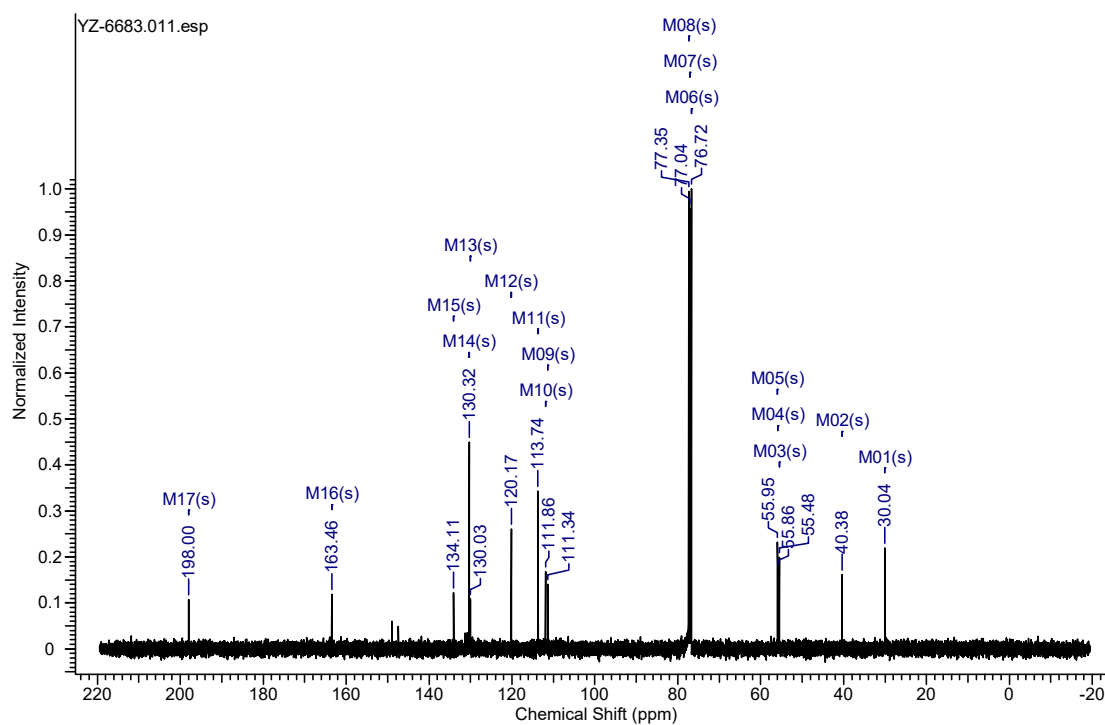

$^{13}\text{C}$  NMR (101 MHz, CHLOROFORM- $d$ )  $\delta$  198.0, 163.5, 134.1, 130.3, 130.0, 120.2, 113.7, 111.9, 111.3, 77.4, 77.0, 76.7, 56.0, 55.9, 55.5, 40.4, 30.0

**Figure S21.**  $^1\text{H}$  and  $^{13}\text{C}$  NMR spectra of **1,3-bis(3,4-dimethoxyphenyl)propan-1-one(4g)<sup>1</sup>**

$^1\text{H}$  NMR (400 MHz, CHLOROFORM- $d$ )  $\delta$  ppm 2.87 - 2.97 (m, 2 H) 3.11 - 3.20 (m, 2 H) 3.78 (s, 3 H) 3.77 (s, 3 H) 3.82 - 3.88 (m, 6 H) 6.66 - 6.73 (m, 3 H) 6.79 (d,  $J=8.31$  Hz, 1 H) 7.44 (d,  $J=1.96$  Hz, 1 H) 7.49 (dd,  $J=8.44, 2.08$  Hz, 1 H)

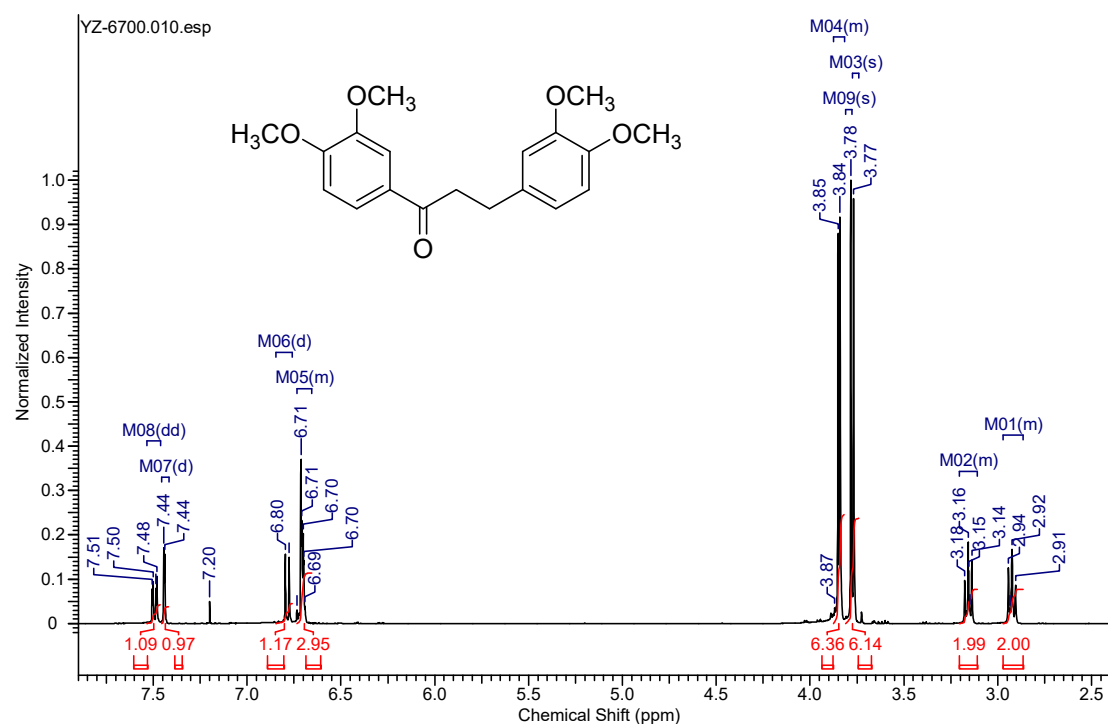

$^{13}\text{C}$  NMR (101 MHz, CHLOROFORM- $d$ )  $\delta$  198.0, 153.3, 149.1, 148.9, 147.4, 134.1, 130.2, 122.7, 120.2, 111.9, 111.4, 110.2, 110.0, 77.4, 77.1, 76.7, 56.1, 56.0, 56.0, 55.9, 40.2, 30.2

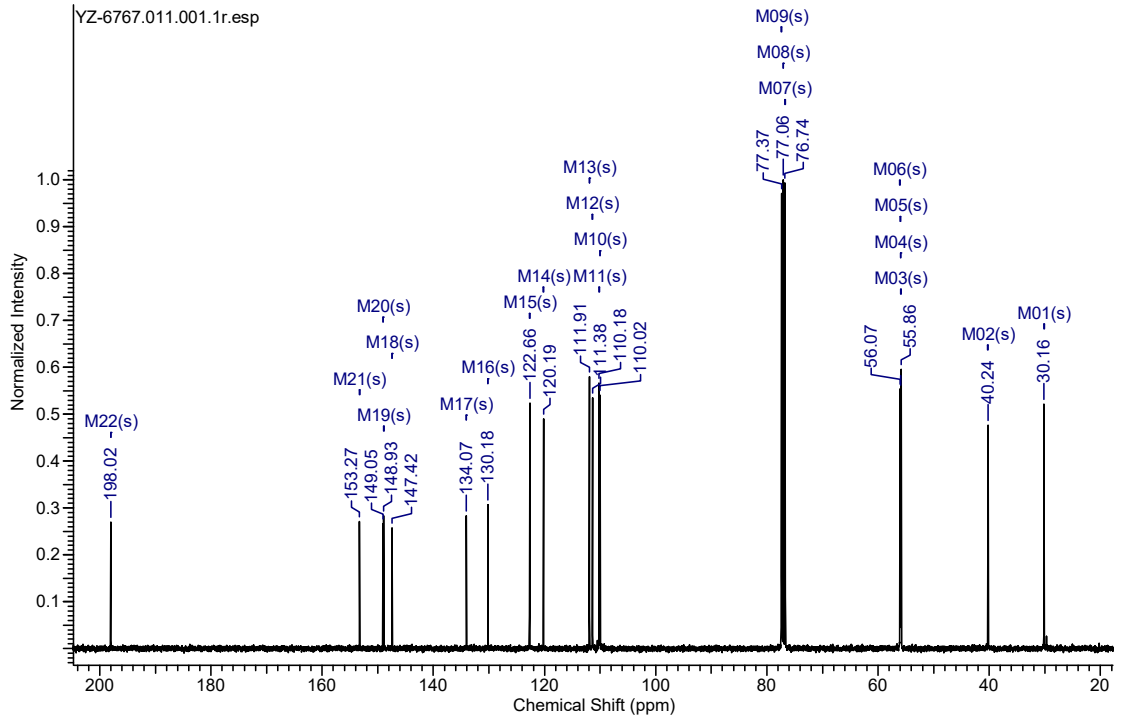

**Figure S22.**  $^1\text{H}$  and  $^{13}\text{C}$  NMR spectra of

**3-(3,4-dimethoxyphenyl)-1-(3,4,5-trimethoxyphenyl)propan-1-one(4h)<sup>5</sup>**

$^1\text{H}$  NMR (400 MHz, CHLOROFORM-*d*)  $\delta$  ppm 2.93 (t,  $J=7.58$  Hz, 2 H) 3.17 (t,  $J=7.70$  Hz, 2 H) 3.74 - 3.86 (m, 15 H) 6.67 - 6.77 (m, 3 H) 7.12 (s, 2 H)

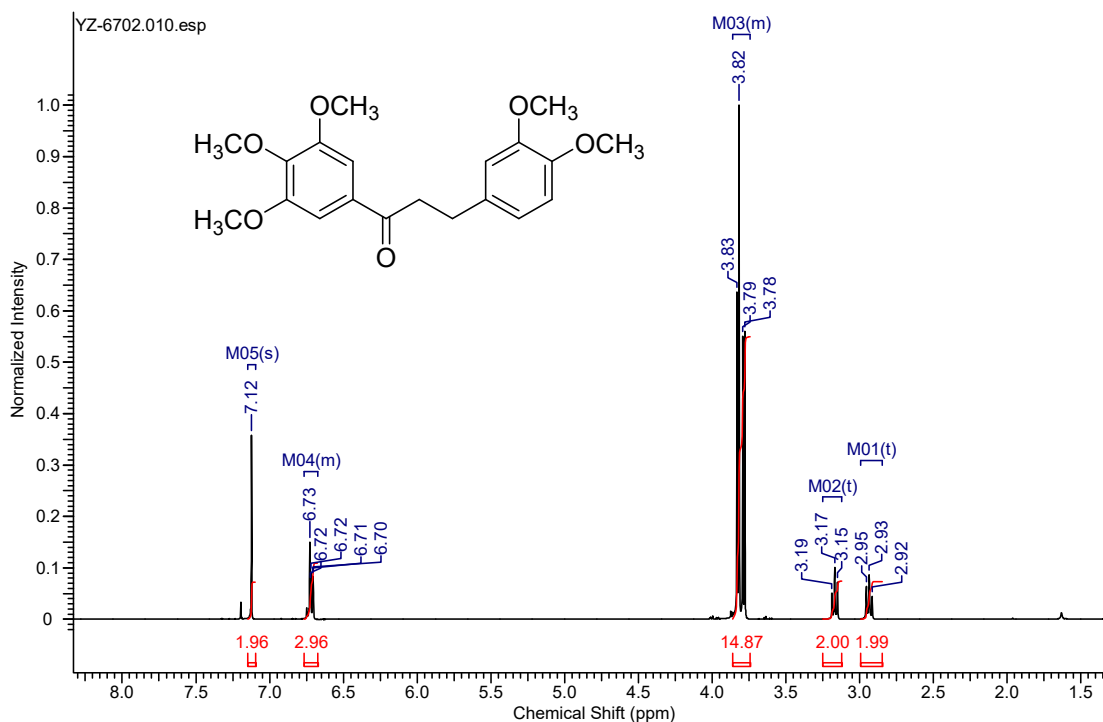

$^{13}\text{C}$  NMR (101 MHz, CHLOROFORM-*d*)  $\delta$  197.1, 152.1, 147.9, 146.5, 141.6, 132.9, 131.2, 119.2, 111.0, 110.4, 104.6, 76.4, 76.0, 75.7, 59.9, 55.3, 54.9, 54.9, 39.6, 29.0

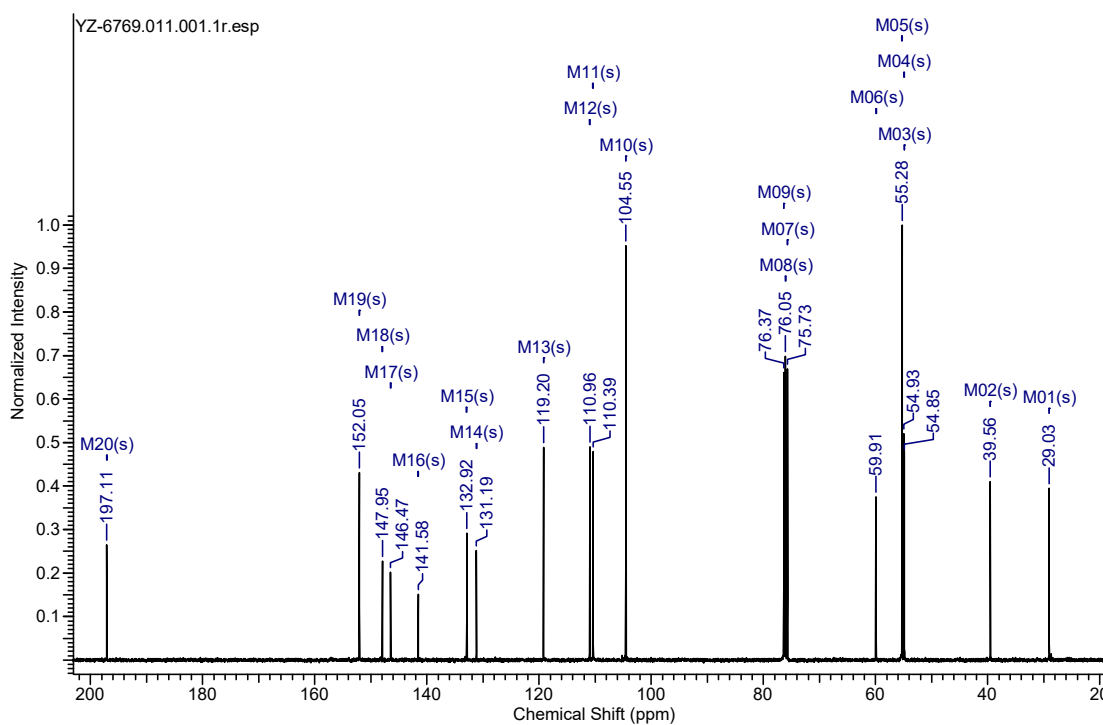

**Figure S23.**  $^1\text{H}$  and  $^{13}\text{C}$  NMR spectra of

**1-(3,5-difluorophenyl)-3-(3,4-dimethoxyphenyl)propan-1-one(4i)**

$^1\text{H}$  NMR (400 MHz,  $\text{CHLOROFORM-}d$ )  $\delta$  ppm 2.95 - 3.06 (m, 2 H) 3.18 - 3.28 (m, 2 H) 3.87 (s, 3 H) 3.86 (s, 3 H) 6.72 - 6.84 (m, 3 H) 7.00 (tt,  $J=8.38, 2.38$  Hz, 1 H) 7.40 - 7.49 (m, 2 H)

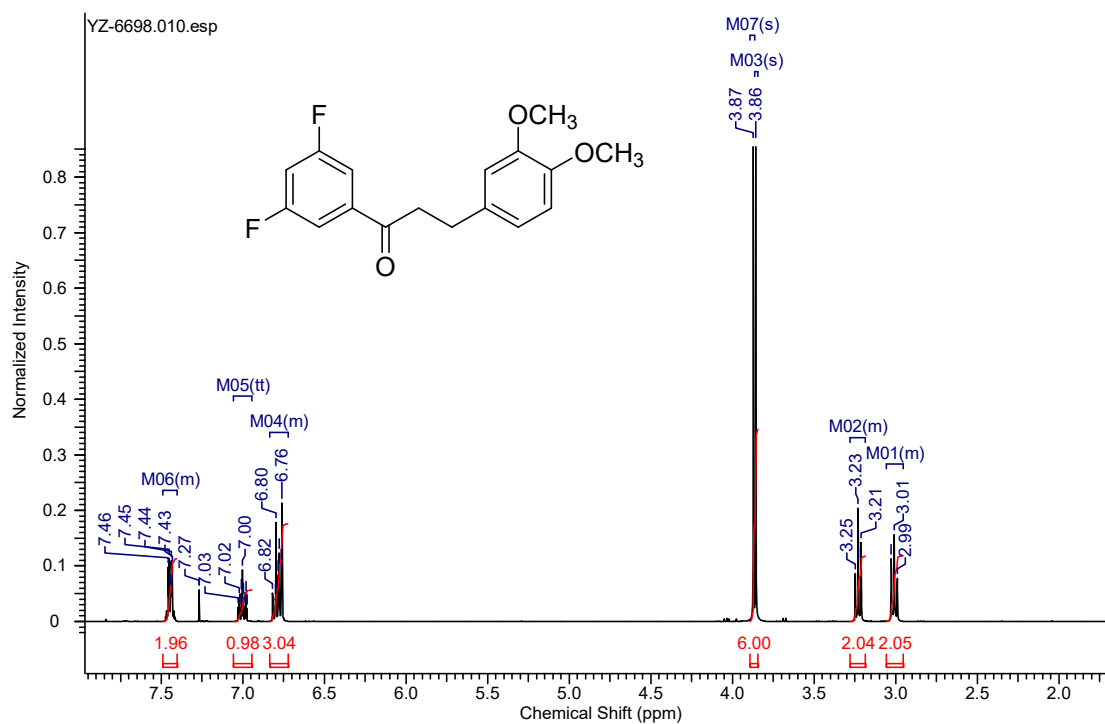

$^{13}\text{C}$  NMR (101 MHz,  $\text{CHLOROFORM-}d$ )  $\delta$  196.7, 164.4, 164.2, 161.9, 161.8, 149.0, 147.6, 139.9, 139.8, 139.7, 133.3, 120.2, 111.9, 111.4, 111.1, 111.0, 110.9, 110.8, 108.6, 108.3, 108.1, 77.4, 77.1, 76.7, 55.9, 55.9, 40.8, 29.5

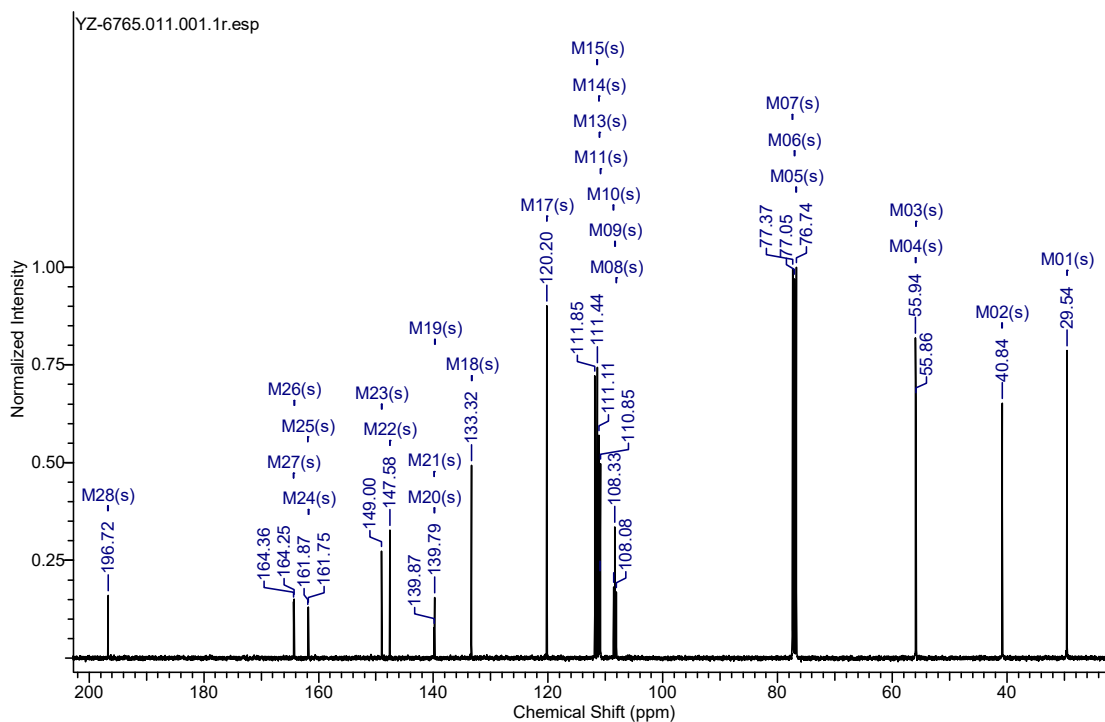

**Figure S24.**  $^1\text{H}$  and  $^{13}\text{C}$  NMR spectra of **3-(3,4-dimethoxyphenyl)-1-(4-fluoro-3-methylphenyl)propan-1-one(4j)**

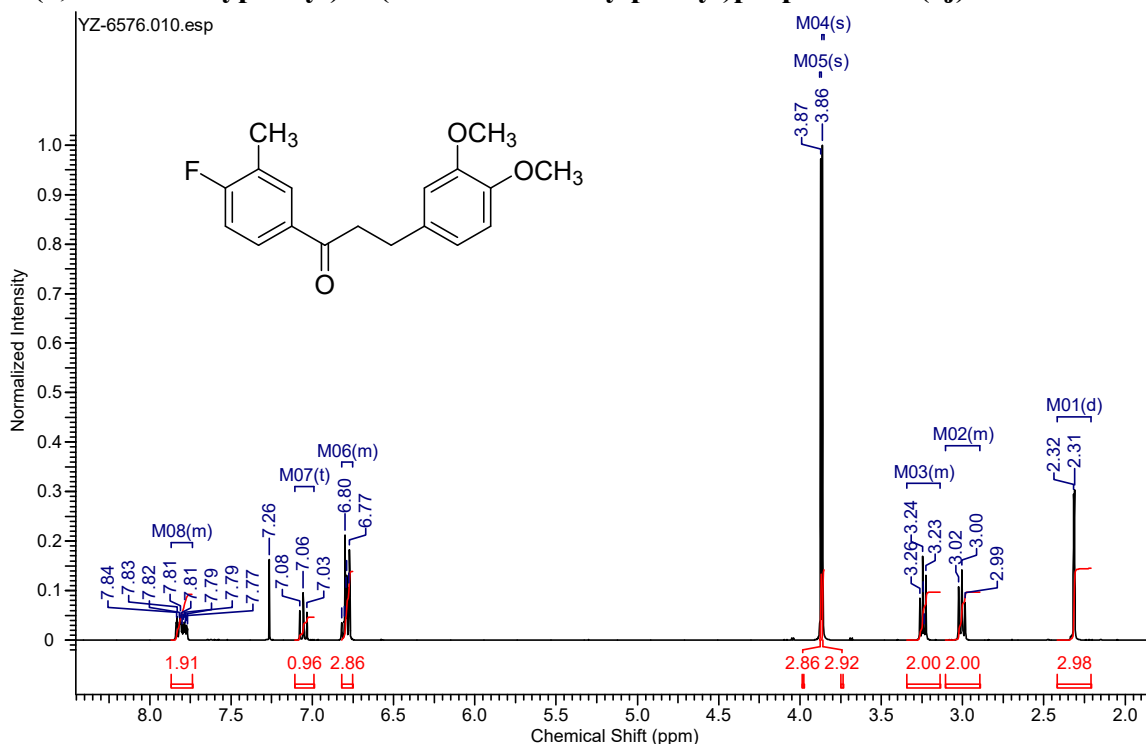

$^1\text{H}$  NMR (400 MHz, CHLOROFORM- $d$ )  $\delta$  7.74 - 7.87 (m, 2H), 7.06 (t,  $J$  = 8.80 Hz, 1H), 6.75 - 6.82 (m, 3H), 3.87 (s, 3H), 3.86 (s, 3H), 3.14 - 3.34 (m, 2H), 2.89 - 3.11 (m, 2H), 2.31 (d,  $J$  = 1.96 Hz, 3H)

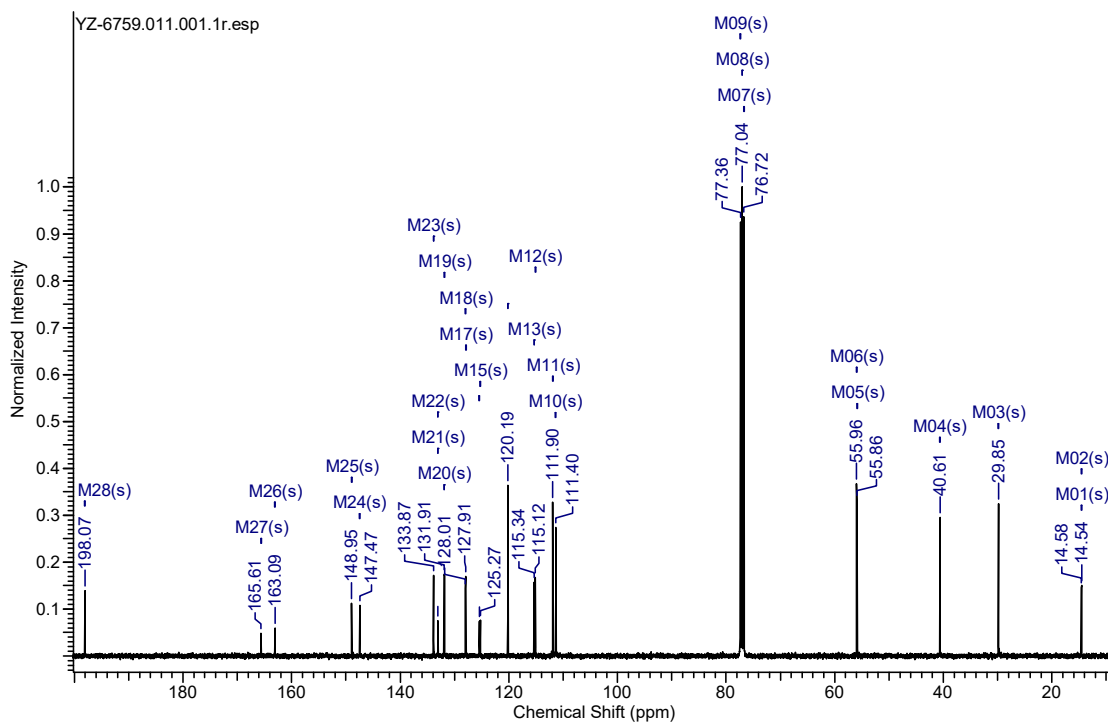

$^{13}\text{C}$  NMR (101 MHz, CHLOROFORM- $d$ )  $\delta$  198.1, 165.6, 163.1, 149.0, 147.5, 133.9, 133.1, 133.1, 131.9, 131.8, 128.0, 127.9, 125.4, 125.3, 120.2, 115.3, 115.1, 111.9, 111.4, 77.4, 77.0, 76.7, 56.0, 55.9, 40.6, 29.8, 14.6, 14.5

**Figure S25.**  $^1\text{H}$  and  $^{13}\text{C}$  NMR spectra of

**1-(4-methoxyphenyl)-3-(3,4,5-trimethoxyphenyl)propan-1-one(4k)<sup>6</sup>**

$^1\text{H}$  NMR (400 MHz, CHLOROFORM- $d$ )  $\delta$  ppm 2.86 - 3.07 (m, 2 H) 3.17 - 3.29 (m, 2 H) 3.78 - 3.89 (m, 12 H) 6.47 (s, 2 H) 6.85 - 6.98 (m, 2 H) 7.87 - 7.98 (m, 2 H)

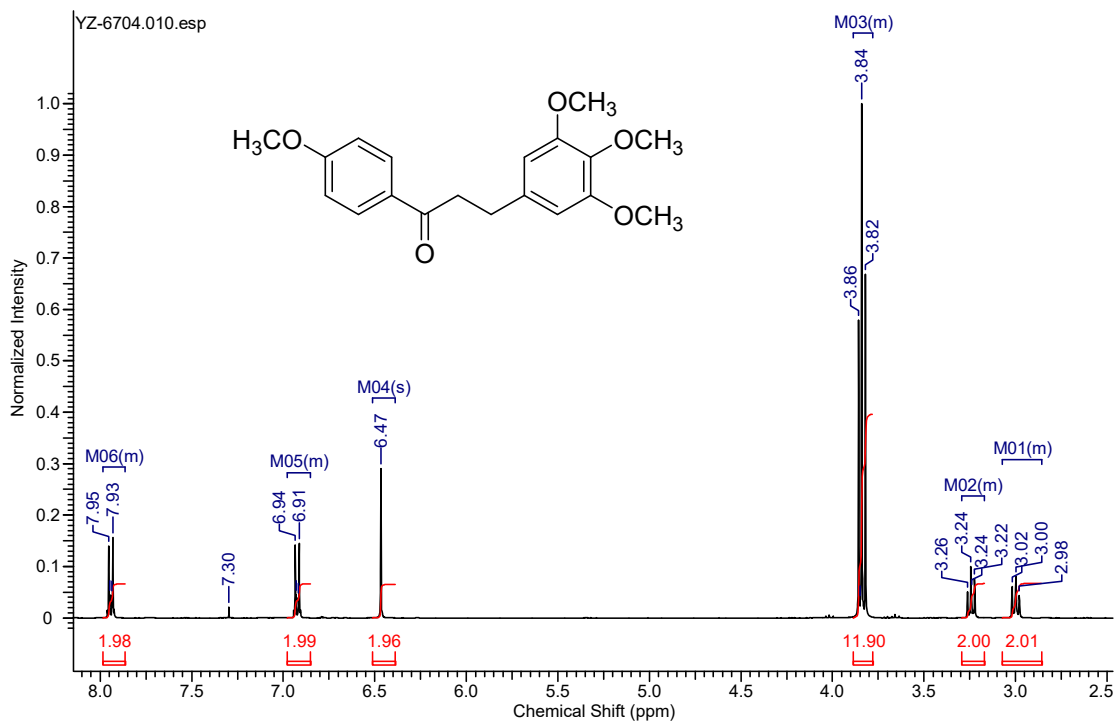

$^{13}\text{C}$  NMR (101 MHz, CHLOROFORM- $d$ )  $\delta$  197.8, 163.5, 153.2, 137.3, 130.3, 130.0, 113.7, 105.4, 77.4, 77.1, 76.8, 60.8, 56.1, 55.5, 55.3, 54.1, 40.2, 32.0, 30.8

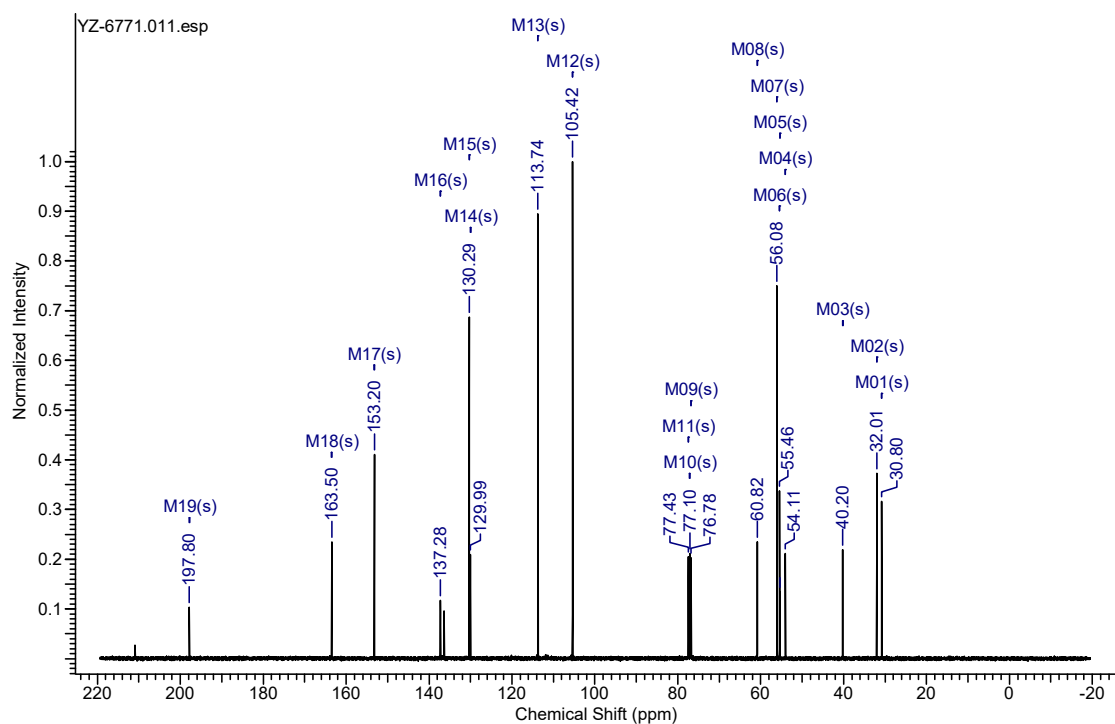

**Figure S26.**  $^1\text{H}$  and  $^{13}\text{C}$  NMR spectra of **1-(3,4-dimethoxyphenyl)-3-(3,4,5-trimethoxyphenyl)propan-1-one(4I) $^2$**

$^1\text{H}$  NMR (400 MHz, CHLOROFORM- $d$ )  $\delta$  7.41 - 7.53 (m, 2H), 6.79 (d,  $J = 8.31$  Hz, 1H), 6.39 (s, 2H), 3.84 (s, 3H), 3.85 (s, 3H), 3.68 - 3.81 (m, 9H), 3.17 (t,  $J = 7.58$  Hz, 2H), 2.92 (t,  $J = 7.46$  Hz, 2H)



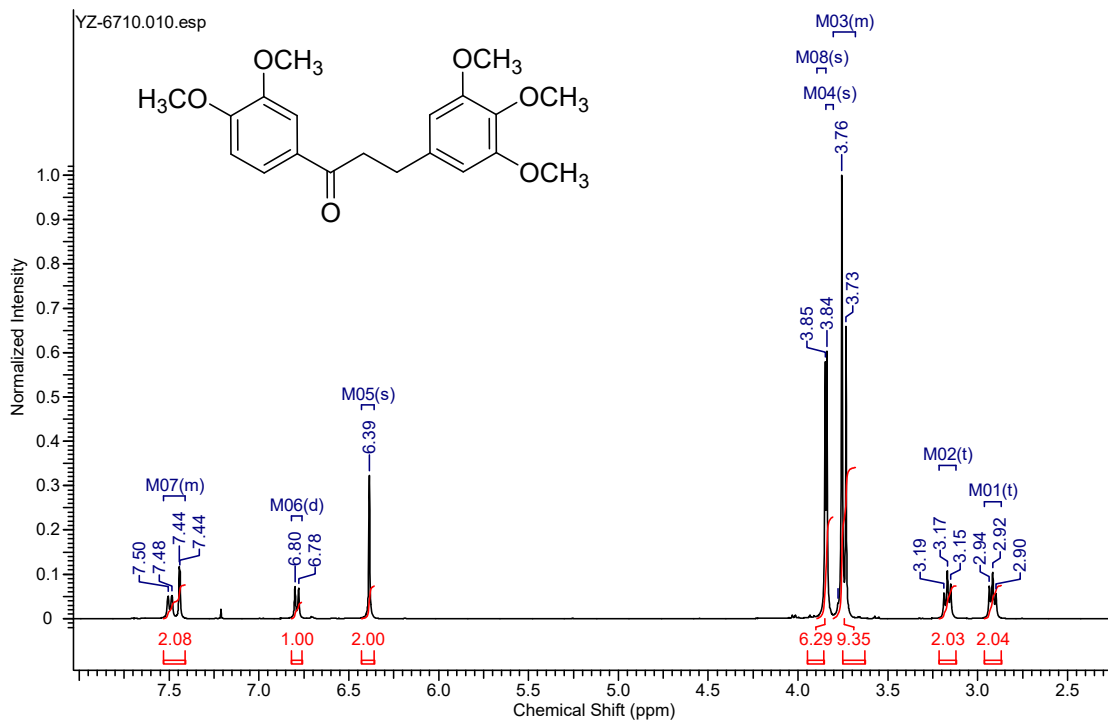

$^{13}\text{C}$  NMR (101 MHz, CHLOROFORM- $d$ )  $\delta$  197.8, 153.3, 153.2, 149.0, 137.2, 130.1, 122.7, 110.2, 110.1, 105.5, 77.5, 77.2, 76.9, 60.8, 56.1, 56.0, 56.0, 40.1, 30.9

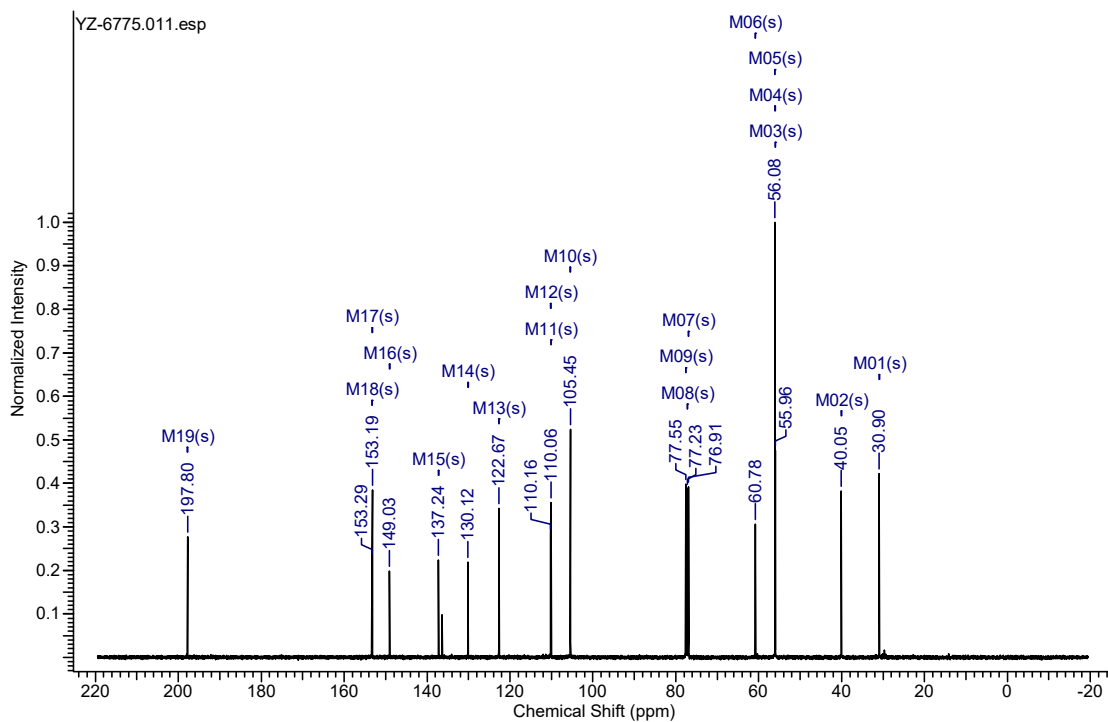

**Figure S27.**  $^1\text{H}$  and  $^{13}\text{C}$  NMR spectra of **1,3-bis(3,4,5-trimethoxyphenyl)propan-1-one(4m)**

$^1\text{H}$  NMR (400 MHz, CHLOROFORM-*d*)  $\delta$  ppm 2.93 - 3.07 (m, 2 H) 3.20 - 3.32 (m, 2 H) 3.80 - 3.88 (m, 9 H) 3.91 (d,  $J=3.91$  Hz, 9 H) 6.47 (s, 2 H) 7.21 (s, 2 H)

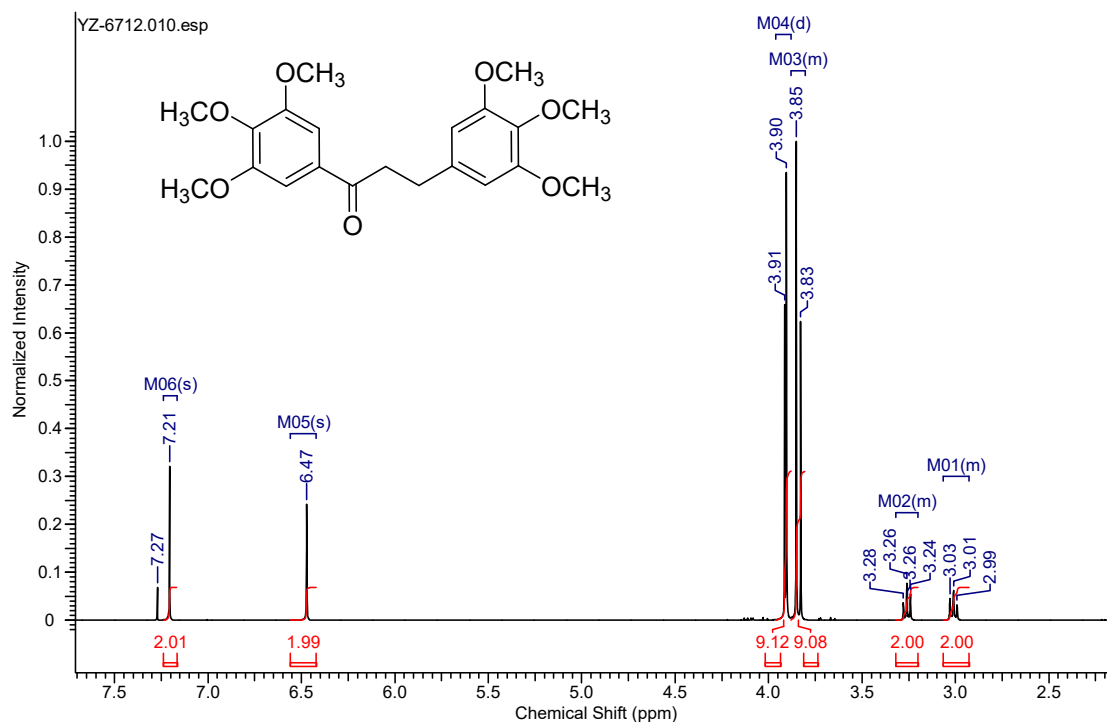

$^{13}\text{C}$  NMR (101 MHz, CHLOROFORM-*d*)  $\delta$  198.0, 153.3, 153.1, 142.7, 137.1, 136.5, 132.2, 105.6, 105.5, 77.4, 77.1, 76.7, 60.9, 60.9, 56.4, 56.1, 40.5, 30.9

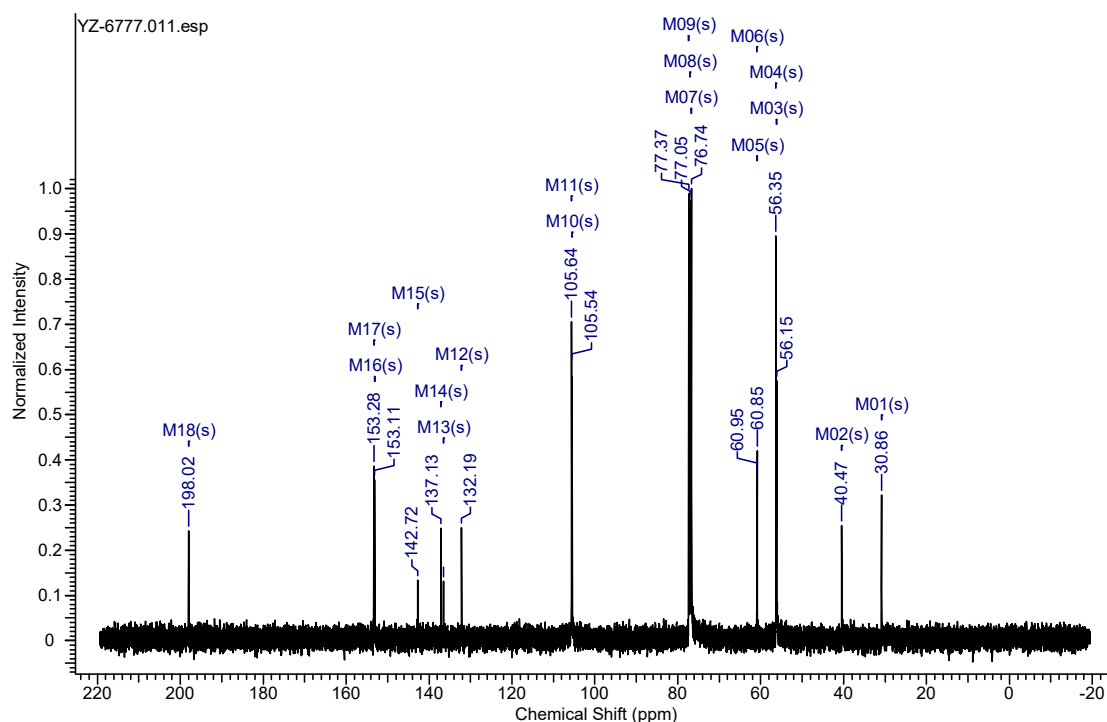

**Figure S28.**  $^1\text{H}$  and  $^{13}\text{C}$  NMR spectra of

**1-(4-fluoro-3-methylphenyl)-3-(3,4,5-trimethoxyphenyl)propan-1-one(4n)**

$^1\text{H}$  NMR (400 MHz, CHLOROFORM- $d$ )  $\delta$  7.73 - 7.85 (m, 2H), 7.06 (t,  $J$  = 8.80 Hz, 1H), 6.46 (s, 2H), 3.79 - 3.88 (m, 9H), 3.22 - 3.29 (m, 2H), 2.95 - 3.04 (m, 2H), 2.31 (d,  $J$  = 1.96 Hz, 3H)

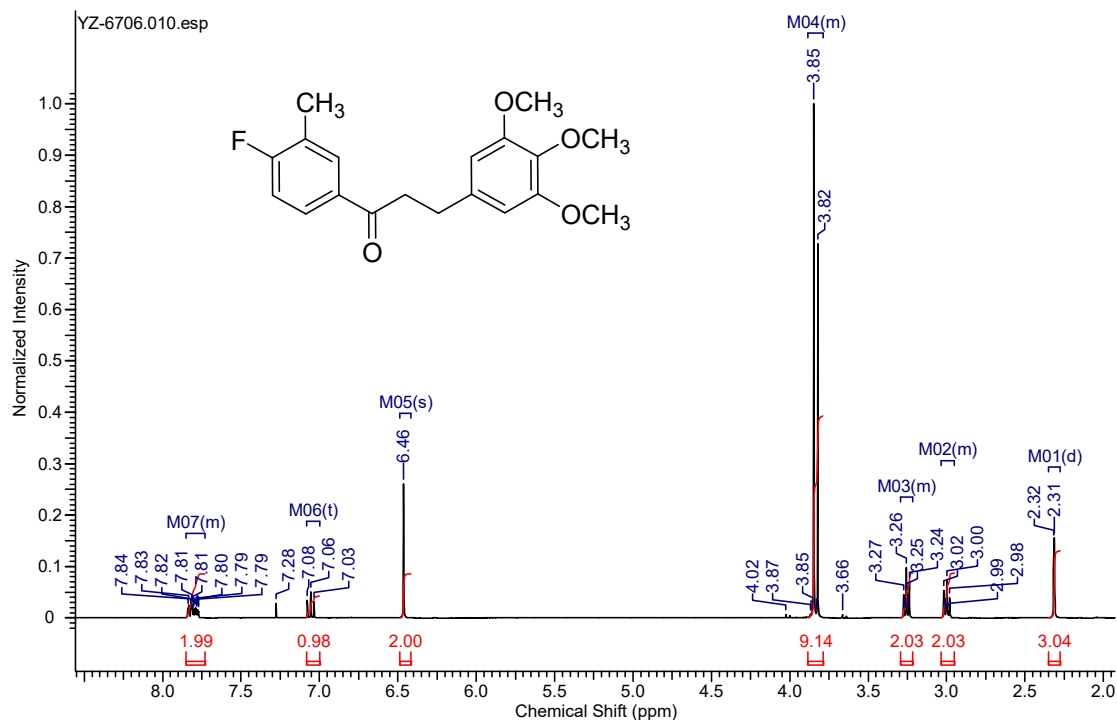

$^{13}\text{C}$  NMR (101 MHz, CHLOROFORM- $d$ )  $\delta$  197.9, 165.6, 163.1, 153.3, 153.1, 137.1, 136.4, 133.0, 131.9, 131.8, 128.0, 127.9, 125.5, 125.3, 115.4, 115.1, 105.5, 105.4, 105.3, 77.4, 77.1, 76.8, 60.8, 60.7, 56.1, 55.9, 40.5, 40.3, 30.6, 14.6, 14.5

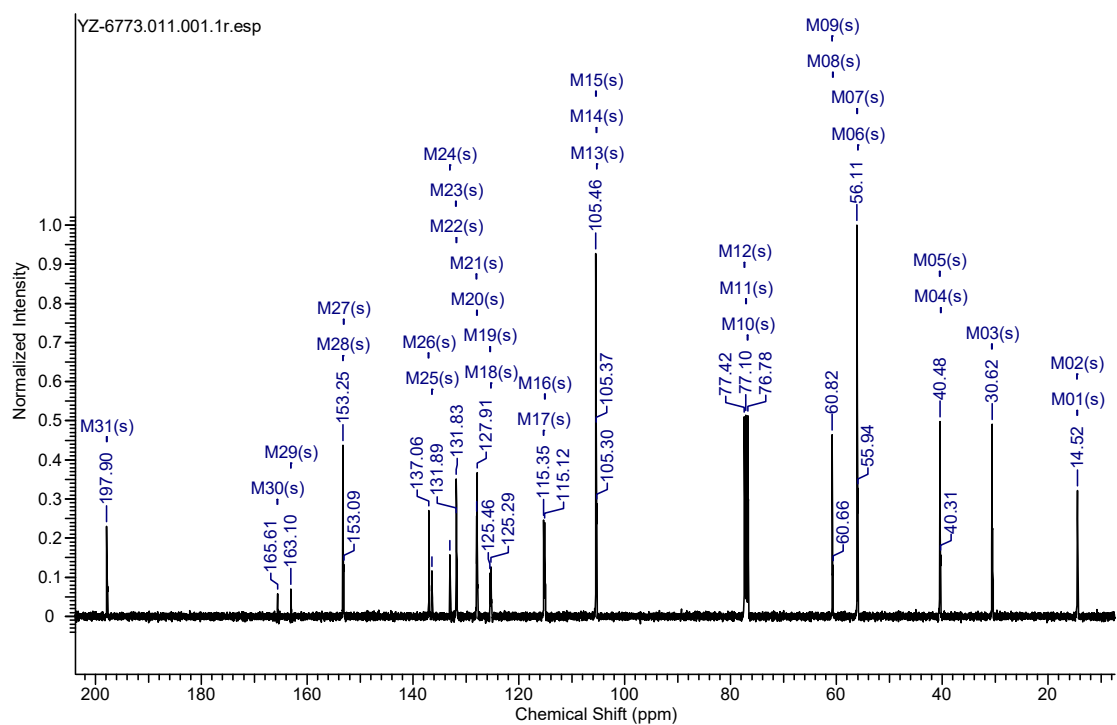

**Figure S29. HPLC-purity spectra of (E)-1,3-bis(4-methoxyphenyl)prop-2-en-1-one(3a)**

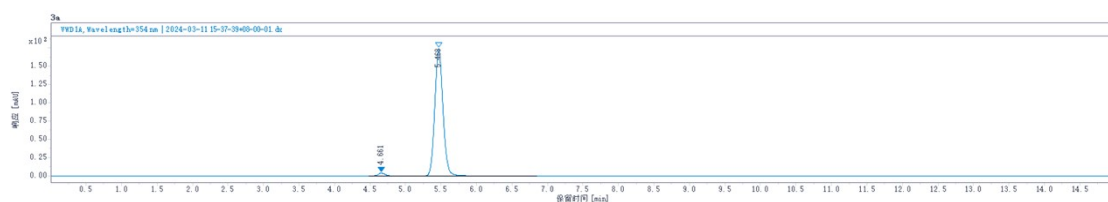

| RT (min) | A (mAU·s) | A %    | H(mAU)   | H%    |
|----------|-----------|--------|----------|-------|
| 5.468    | 14049.819 | 98.235 | 1744.983 | 97.94 |

**Figure S30. HPLC-purity spectra of (E)-1-(3,4-dimethoxyphenyl)-3-(4-methoxyphenyl)prop-2-en-1-one(3b)**

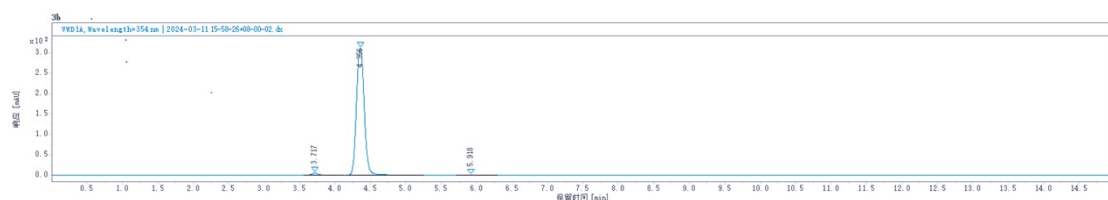

| RT (min) | A (mAU·s) | A %    | H(mAU)   | H%    |
|----------|-----------|--------|----------|-------|
| 4.356    | 23751.979 | 98.840 | 3101.850 | 98.53 |

**Figure S31. HPLC-purity spectra of (E)-3-(4-methoxyphenyl)-1-(3,4,5-trimethoxyphenyl)prop-2-en-1-one(3c)**

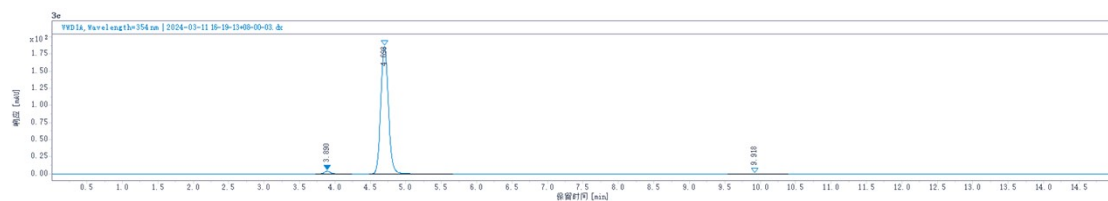

| RT (min) | A (mAU·s) | A %    | H(mAU)   | H%    |
|----------|-----------|--------|----------|-------|
| 4.698    | 13895.724 | 98.201 | 1861.197 | 97.95 |

**Figure S32. HPLC-purity spectra of (E)-1-(3,5-difluorophenyl)-3-(4-methoxyphenyl)prop-2-en-1-one(3d)**

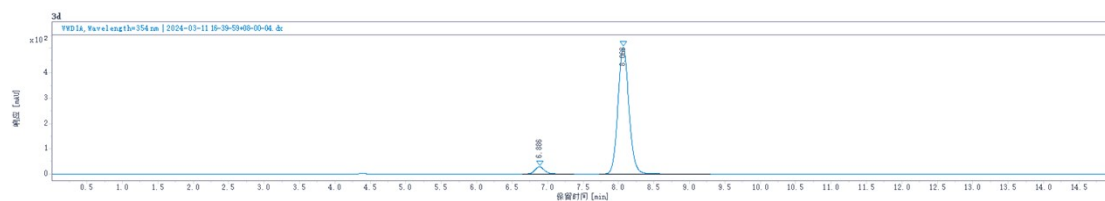

| RT (min) | A (mAU·s) | A %    | H(mAU)  | H%    |
|----------|-----------|--------|---------|-------|
| 8.068    | 5413.124  | 95.385 | 502.750 | 94.63 |

**Figure S33.** HPLC-purity spectra of **(E)-1-(4-fluoro-3-methylphenyl)-3-(4-methoxyphenyl)prop-2-en-1-one(3e)**

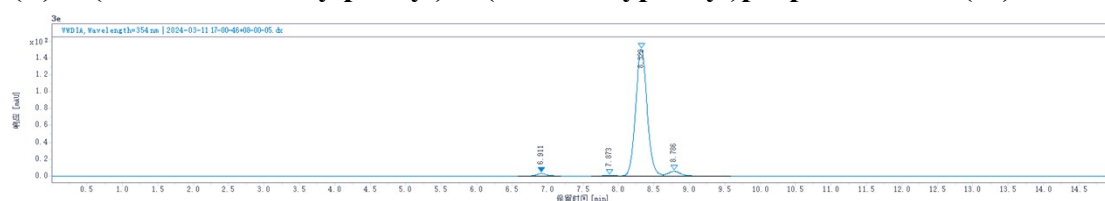

| RT (min) | A (mAU·s) | A %    | H(mAU)   | H%    |
|----------|-----------|--------|----------|-------|
| 8.322    | 16918.283 | 95.223 | 1505.866 | 94.27 |

**Figure S34.** HPLC-purity spectra of **(E)-3-(3,4-dimethoxyphenyl)-1-(4-methoxyphenyl)prop-2-en-1-one(3f)**

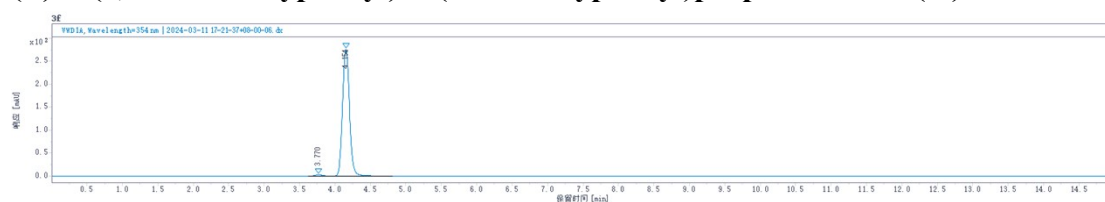

| RT (min) | A (mAU·s) | A %    | H(mAU)   | H%    |
|----------|-----------|--------|----------|-------|
| 4.154    | 18831.46  | 98.910 | 2762.747 | 98.72 |

**Figure S35.** HPLC-purity spectra of **(E)-1,3-bis(3,4-dimethoxyphenyl)prop-2-en-1-one(3g)**

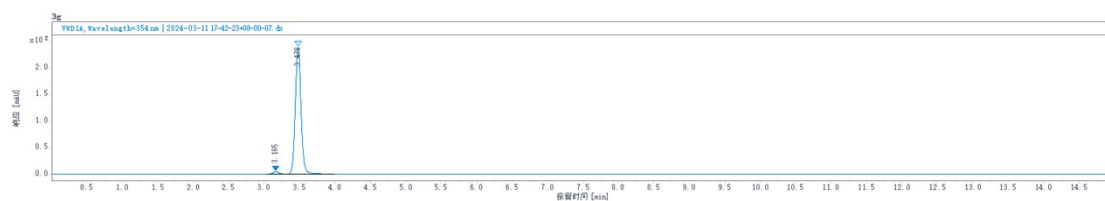

| RT (min) | A (mAU·s) | A %    | H(mAU)   | H%   |
|----------|-----------|--------|----------|------|
| 3.478    | 13510.705 | 98.482 | 2387.008 | 98.4 |

**Figure S36.** HPLC-purity spectra of  
**(E)-3-(3,4-dimethoxyphenyl)-1-(3,4,5-trimethoxyphenyl)prop-2-en-1-one(3h)**

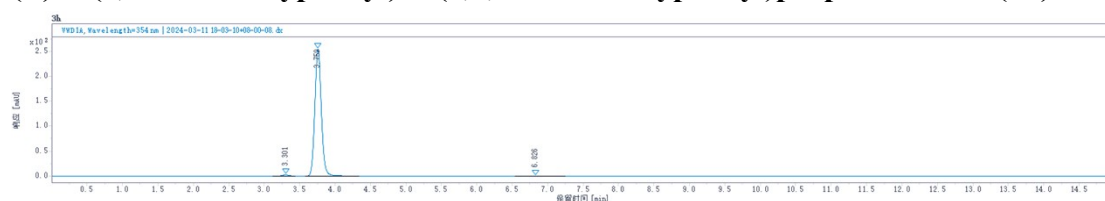

| RT (min) | A (mAU·s) | A %    | H(mAU)   | H%    |
|----------|-----------|--------|----------|-------|
| 3.759    | 16322.255 | 98.954 | 2542.324 | 98.96 |

**Figure S37.** HPLC-purity spectra of  
**(E)-1-(3,5-difluorophenyl)-3-(3,4-dimethoxyphenyl)prop-2-en-1-one(3i)**

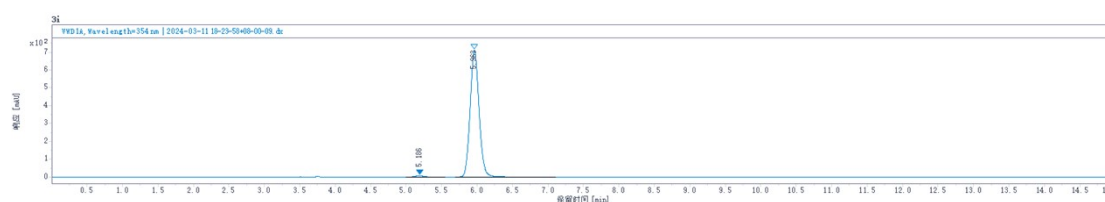

| RT (min) | A (mAU·s) | A %    | H(mAU)  | H%    |
|----------|-----------|--------|---------|-------|
| 5.963    | 6239.909  | 99.062 | 711.151 | 98.93 |

**Figure S38.** HPLC-purity spectra of  
**(E)-3-(3,4-dimethoxyphenyl)-1-(4-fluoro-3-methylphenyl)prop-2-en-1-one(3j)**

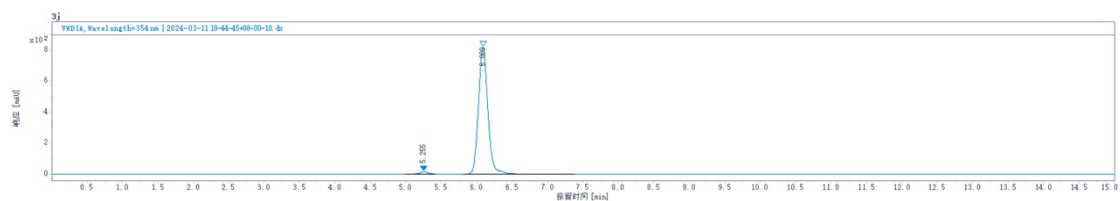

| RT (min) | A (mAU·s) | A %    | H(mAU)  | H%    |
|----------|-----------|--------|---------|-------|
| 6.089    | 7511.836  | 98.572 | 818.616 | 98.35 |

**Figure S39.** HPLC-purity spectra of **(E)-1-(4-methoxyphenyl)-3-(3,4,5-trimethoxyphenyl)prop-2-en-1-one(3k)**

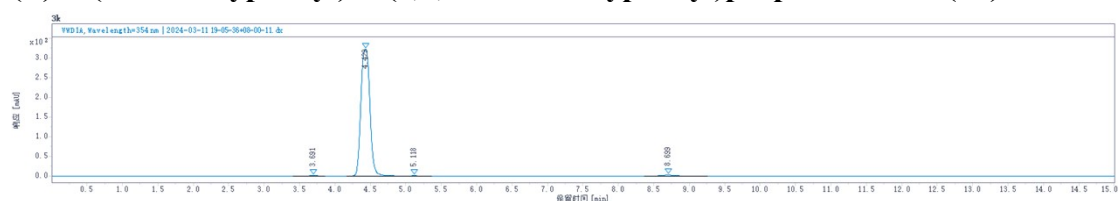

| RT (min) | A (mAU·s) | A %    | H(mAU)   | H%    |
|----------|-----------|--------|----------|-------|
| 4.429    | 28579.264 | 98.276 | 3222.672 | 98.51 |

**Figure S40.** HPLC-purity spectra of **(E)-1-(3,4-dimethoxyphenyl)-3-(3,4,5-trimethoxyphenyl)prop-2-en-1-one(3l)**

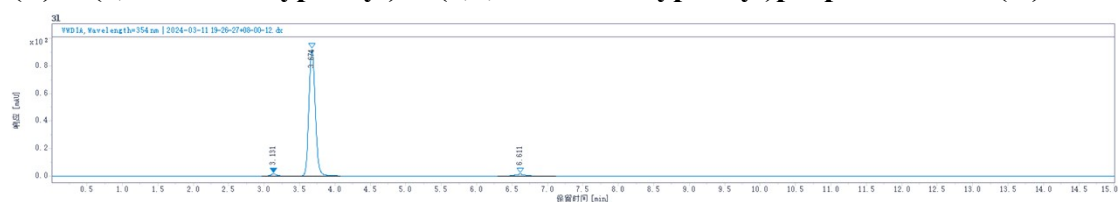

| RT (min) | A (mAU·s) | A %    | H(mAU)  | H%    |
|----------|-----------|--------|---------|-------|
| 3.674    | 5726.501  | 96.403 | 921.734 | 97.11 |

**Figure S41.** HPLC-purity spectra of **(E)-1,3-bis(3,4,5-trimethoxyphenyl)prop-2-en-1-one(3m)**

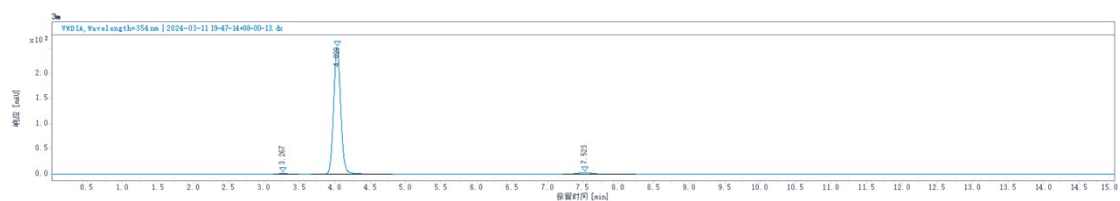

| RT (min) | A (mAU·s) | A %    | H(mAU)   | H%    |
|----------|-----------|--------|----------|-------|
| 4.029    | 17553.933 | 97.446 | 2523.966 | 98.27 |

**Figure S42.** HPLC-purity spectra of **(E)-1-(4-fluoro-3-methylphenyl)-3-(3,4,5-trimethoxyphenyl)prop-2-en-1-one(3n)**

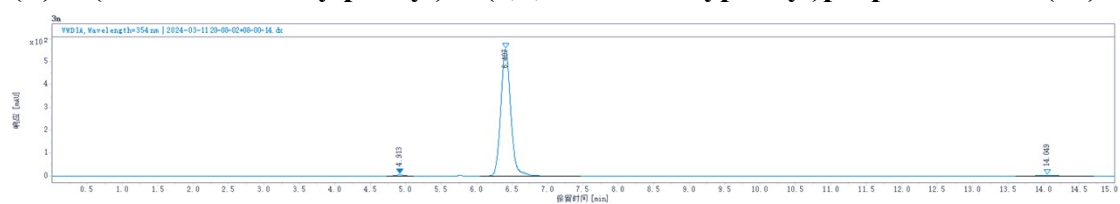

| RT (min) | A (mAU·s) | A %    | H(mAU)  | H%    |
|----------|-----------|--------|---------|-------|
| 6.407    | 5391.019  | 98.733 | 554.526 | 98.81 |

**Figure S43.** HPLC-purity spectra of **1,3-bis(4-methoxyphenyl)propan-1-one(4a)**

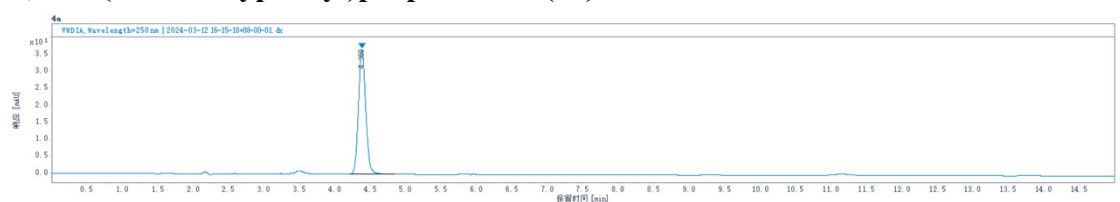

| RT (min) | A (mAU·s) | A %     | H(mAU) | H%     |
|----------|-----------|---------|--------|--------|
| 4.380    | 264.727   | 100.000 | 36.785 | 100.00 |

**Figure S44.** HPLC-purity spectra of **1-(3,4-dimethoxyphenyl)-3-(4-methoxyphenyl)propan-1-one(4b)**



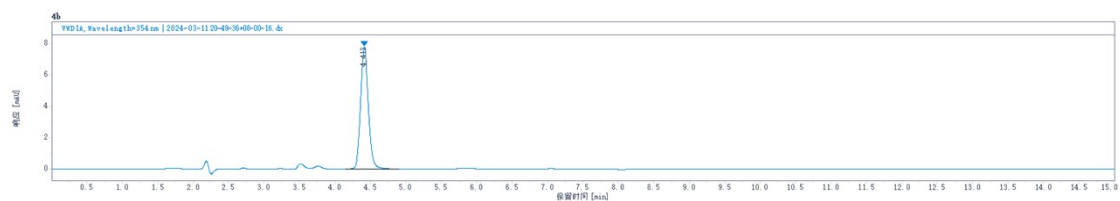

| RT (min) | A (mAU·s) | A %     | H(mAU) | H%     |
|----------|-----------|---------|--------|--------|
| 4.413    | 59.679    | 100.000 | 7.767  | 100.00 |

**Figure S45.** HPLC-purity spectra of **3-(4-methoxyphenyl)-1-(3,4,5-trimethoxyphenyl)propan-1-one(4c)**

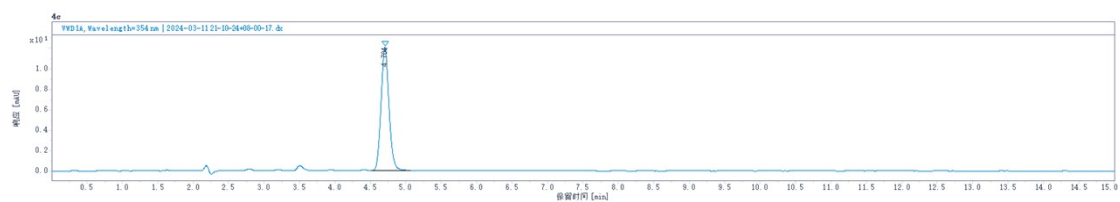

| RT (min) | A (mAU·s) | A %     | H(mAU) | H%     |
|----------|-----------|---------|--------|--------|
| 4.704    | 93.805    | 100.000 | 12.027 | 100.00 |

**Figure S46.** HPLC-purity spectra of **1-(3,5-difluorophenyl)-3-(4-methoxyphenyl)propan-1-one(4d)**

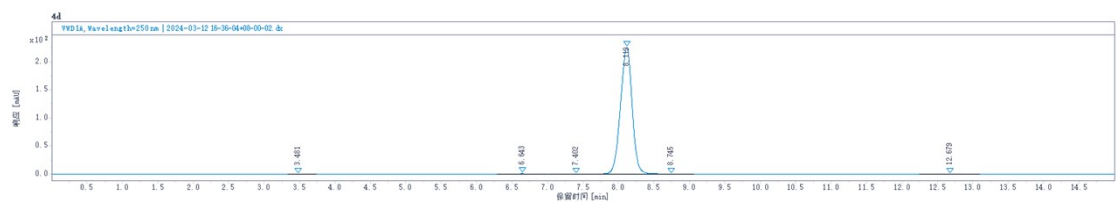

| RT (min) | A (mAU·s) | A %    | H(mAU)   | H%    |
|----------|-----------|--------|----------|-------|
| 8.119    | 25828.361 | 99.432 | 2256.125 | 99.40 |

**Figure S47.** HPLC-purity spectra of **1-(4-fluoro-3-methylphenyl)-3-(4-methoxyphenyl)propan-1-one(4e)**

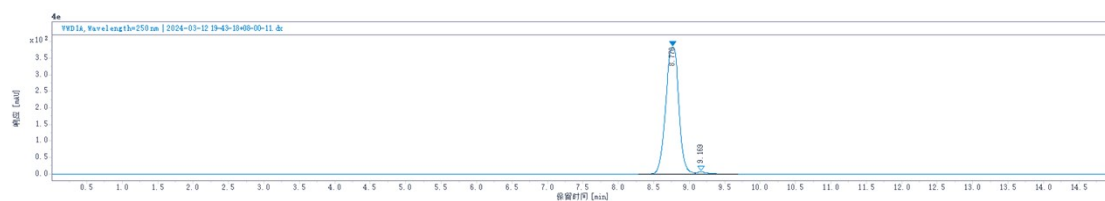

| RT (min) | A (mAU·s) | A %    | H(mAU)   | H%    |
|----------|-----------|--------|----------|-------|
| 8.770    | 49187.772 | 98.639 | 3832.089 | 98.58 |

**Figure S48.** HPLC-purity spectra of **3-(3,4-dimethoxyphenyl)-1-(4-methoxyphenyl)propan-1-one(4f)**

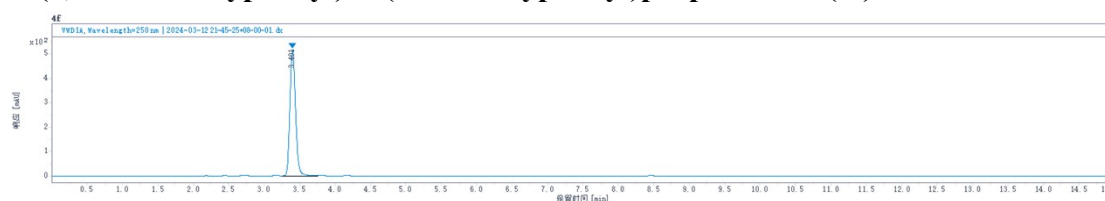

| RT (min) | A (mAU·s) | A %     | H(mAU)  | H%     |
|----------|-----------|---------|---------|--------|
| 3.401    | 2854.960  | 100.000 | 519.424 | 100.00 |

**Figure S49.** HPLC-purity spectra of **1,3-bis(3,4-dimethoxyphenyl)propan-1-one(4g)**

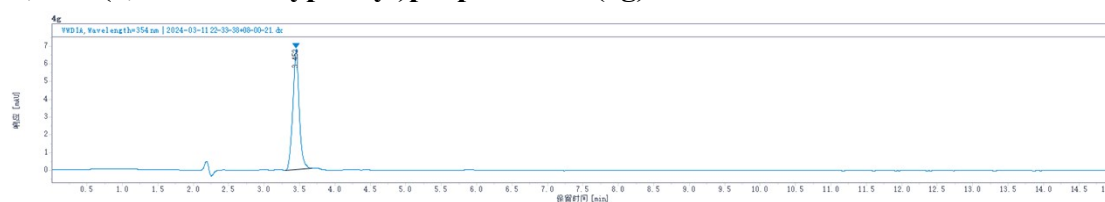

| RT (min) | A (mAU·s) | A %     | H(mAU) | H%     |
|----------|-----------|---------|--------|--------|
| 3.452    | 42.727    | 100.000 | 6.781  | 100.00 |

**Figure S50.** HPLC-purity spectra of **3-(3,4-dimethoxyphenyl)-1-(3,4,5-trimethoxyphenyl)propan-1-one(4h)**

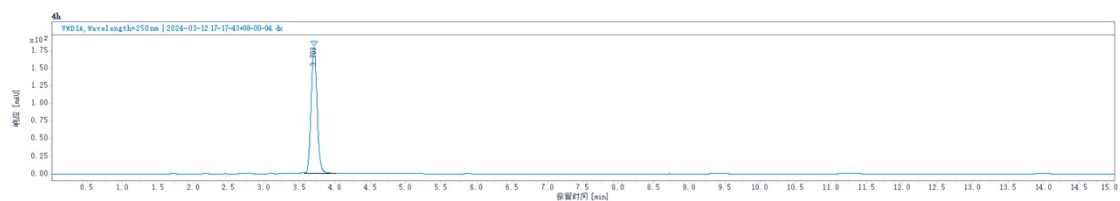

| RT (min) | A (mAU·s) | A %     | H(mAU)  | H%     |
|----------|-----------|---------|---------|--------|
| 3.703    | 1067.594  | 100.000 | 180.457 | 100.00 |

**Figure S51.** HPLC-purity spectra of **1-(3,5-difluorophenyl)-3-(3,4-dimethoxyphenyl)propan-1-one(4i)**

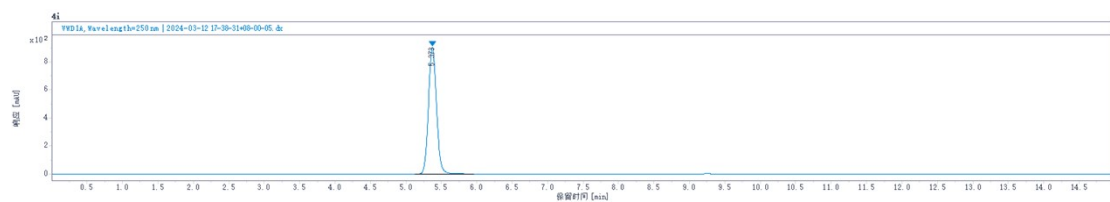

| RT (min) | A (mAU·s) | A %     | H(mAU)  | H%     |
|----------|-----------|---------|---------|--------|
| 5.373    | 7143.652  | 100.000 | 904.950 | 100.00 |

**Figure S52.** HPLC-purity spectra of **3-(3,4-dimethoxyphenyl)-1-(4-fluoro-3-methylphenyl)propan-1-one(4j)**

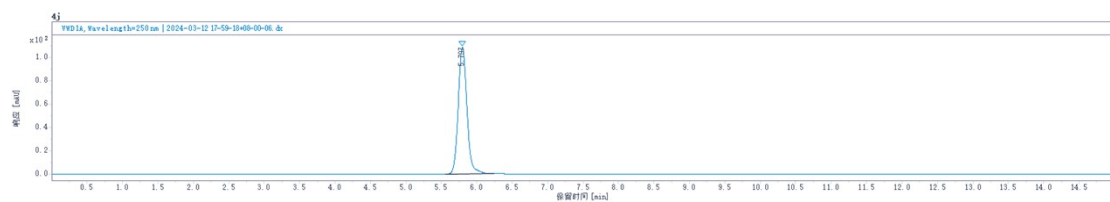

| RT (min) | A (mAU·s) | A %     | H(mAU)   | H%     |
|----------|-----------|---------|----------|--------|
| 5.797    | 9298.015  | 100.000 | 1088.935 | 100.00 |

**Figure S53.** HPLC-purity spectra of **1-(4-methoxyphenyl)-3-(3,4,5-trimethoxyphenyl)propan-1-one(4k)**

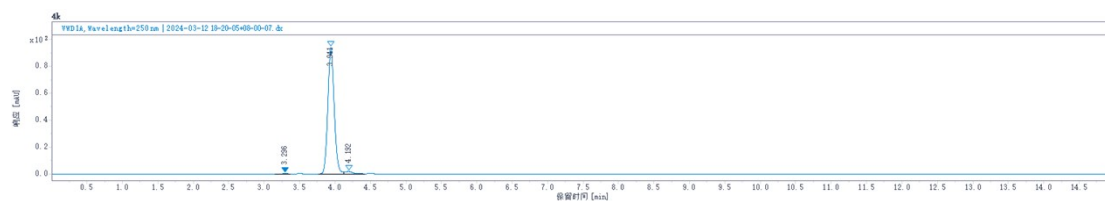

| RT (min) | A (mAU·s) | A %    | H(mAU)  | H%    |
|----------|-----------|--------|---------|-------|
| 3.941    | 5934.708  | 97.561 | 941.638 | 97.91 |

**Figure S54.** HPLC-purity spectra of **1-(3,4-dimethoxyphenyl)-3-(3,4,5-trimethoxyphenyl)propan-1-one(4l)**

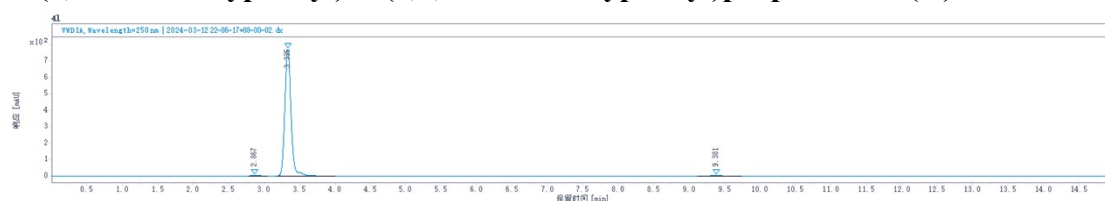

| RT (min) | A (mAU·s) | A %    | H(mAU)  | H%    |
|----------|-----------|--------|---------|-------|
| 3.335    | 4676.390  | 98.942 | 772.720 | 99.19 |

**Figure S55.** HPLC-purity spectra of **1,3-bis(3,4,5-trimethoxyphenyl)propan-1-one(4m)**

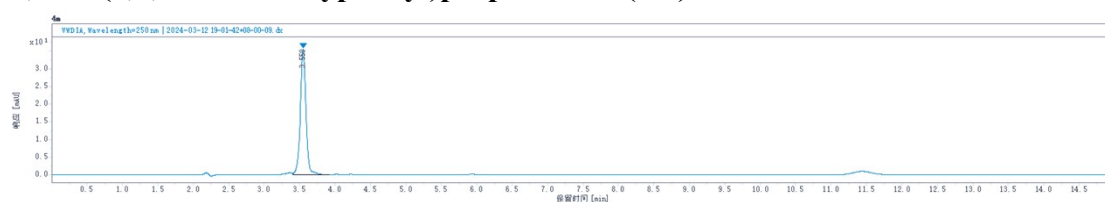

| RT (min) | A (mAU·s) | A %     | H(mAU) | H%     |
|----------|-----------|---------|--------|--------|
| 3.550    | 196.473   | 100.000 | 35.503 | 100.00 |

**Figure S56.** HPLC-purity spectra of **1-(4-fluoro-3-methylphenyl)-3-(3,4,5-trimethoxyphenyl)propan-1-one(4n)**

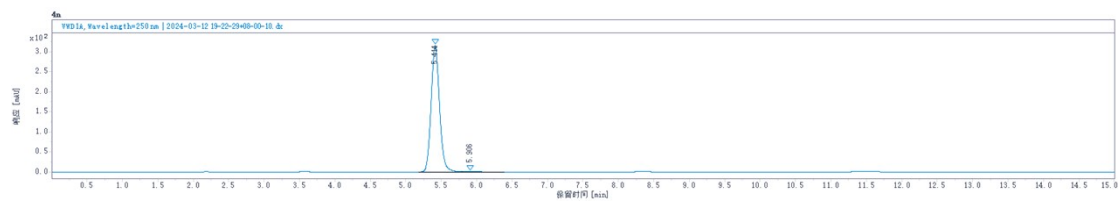

| RT (min) | A (mAU·s) | A %    | H(mAU)  | H%    |
|----------|-----------|--------|---------|-------|
| 5.414    | 2615.111  | 99.235 | 315.734 | 99.38 |

**Figure S57.** IR spectra of  
**(E)-1-(4-fluoro-3-methylphenyl)-3-(4-methoxyphenyl)prop-2-en-1-one(3e)**

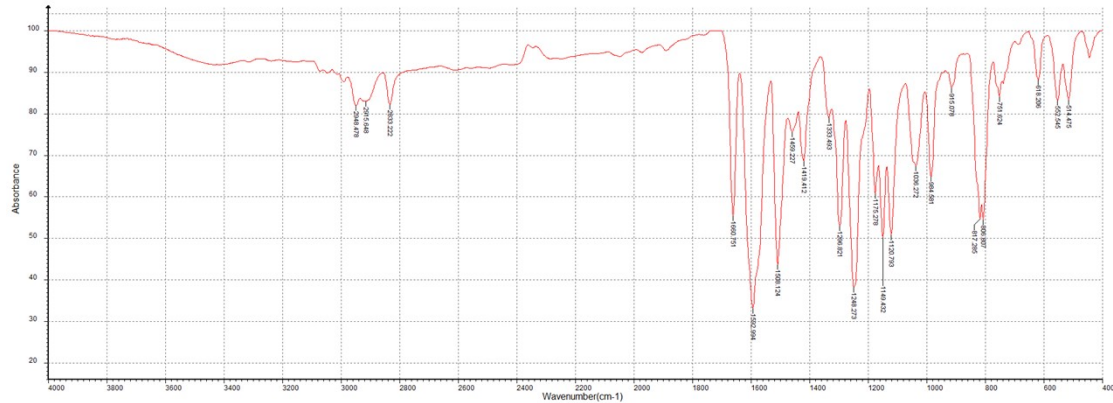

**Figure S58.** IR spectra of  
**(E)-3-(3,4-dimethoxyphenyl)-1-(4-fluoro-3-methylphenyl)prop-2-en-1-one(3j)**

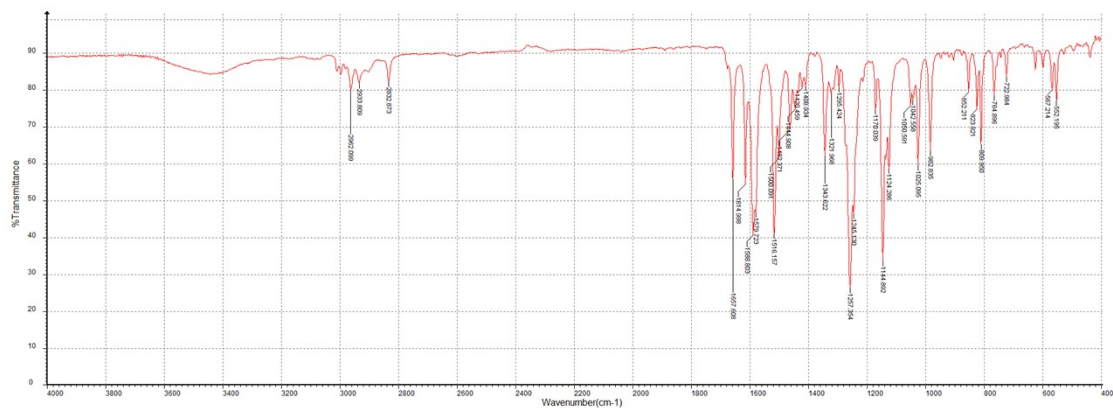

**Figure S59.** IR spectra of  
**1-(3,5-difluorophenyl)-3-(4-methoxyphenyl)propan-1-one(4d)**

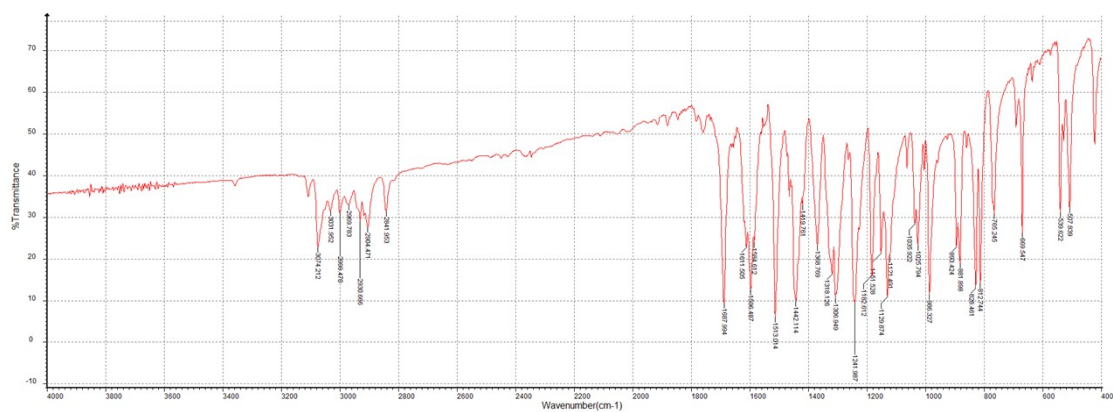

**Figure S60.** IR spectra of  
**1-(4-fluoro-3-methylphenyl)-3-(4-methoxyphenyl)propan-1-one(4e)**

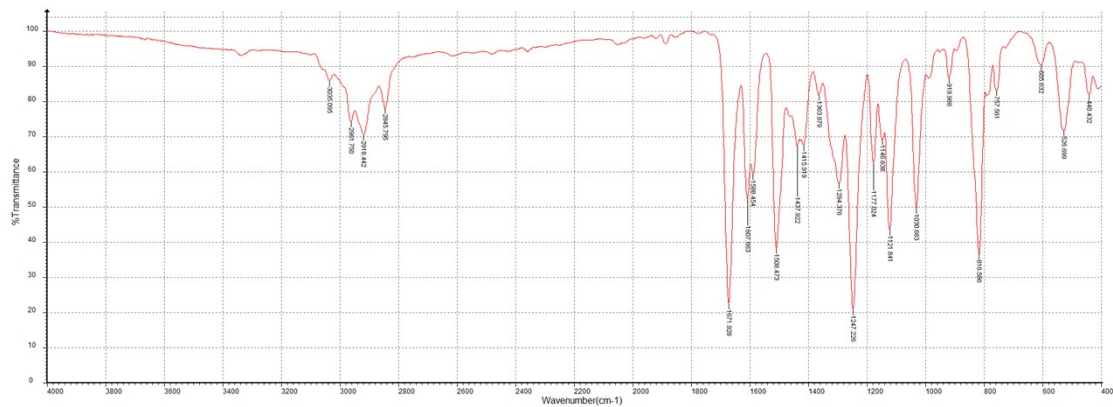

**Figure S61.** IR spectra of  
**1-(3,5-difluorophenyl)-3-(3,4-dimethoxyphenyl)propan-1-one(4i)**

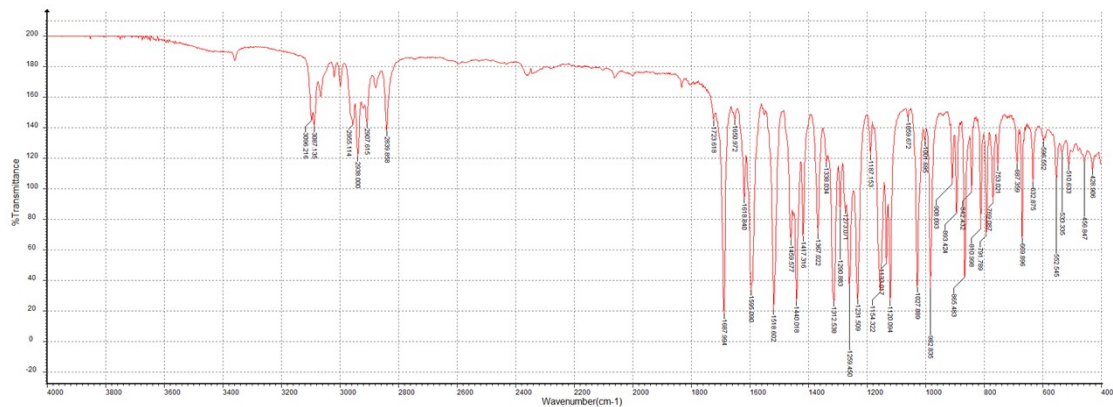

**Figure S62.** IR spectra of  
**3-(3,4-dimethoxyphenyl)-1-(4-fluoro-3-methylphenyl)propan-1-one(4j)**

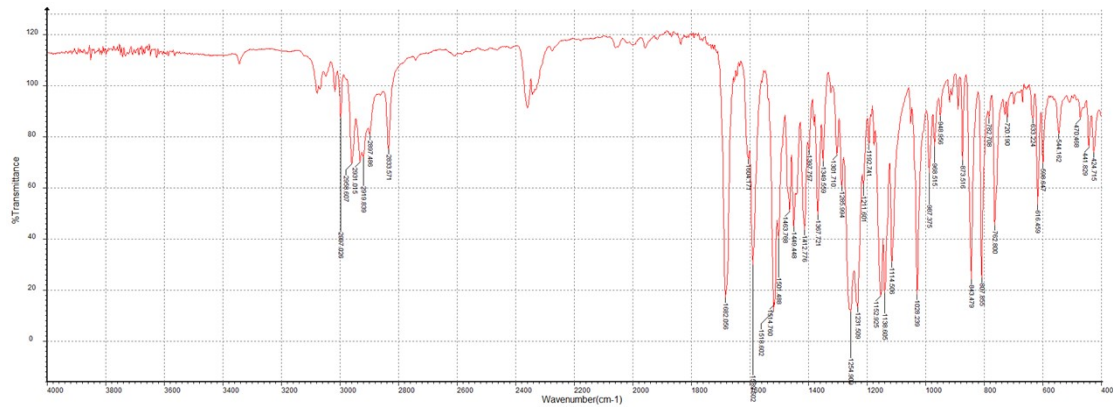

**Figure S63.** IR spectra of  
**1,3-bis(3,4,5-trimethoxyphenyl)propan-1-one(4m)**

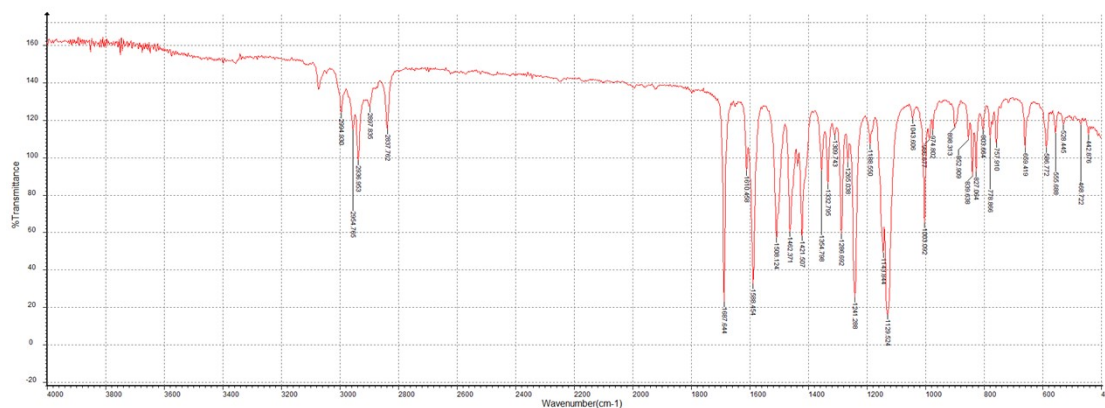

**Figure S64.** IR spectra of  
**1-(4-fluoro-3-methylphenyl)-3-(3,4,5-trimethoxyphenyl)propan-1-one(4n)**

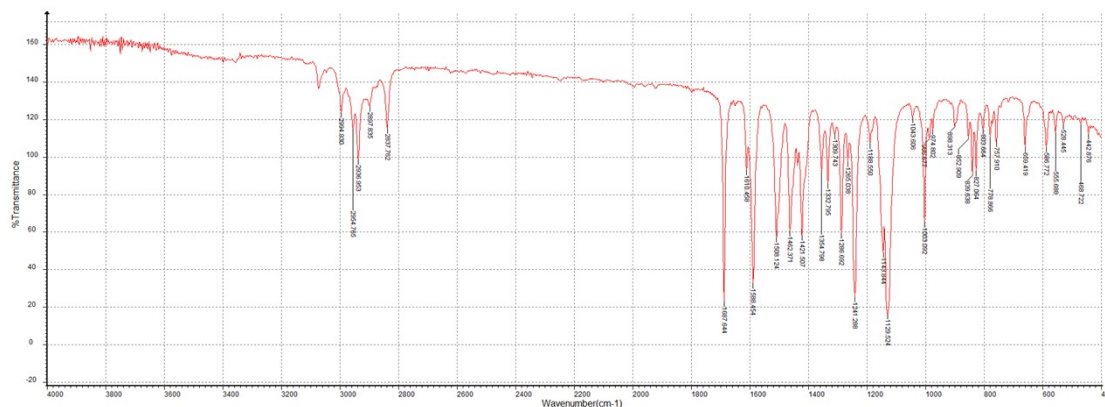

## References:

1. Vijaya Bhaskar Reddy, M.; Hung, H. Y.; Kuo, P. C.; Huang, G. J.; Chan, Y. Y.; Huang, S. C.; Wu, S. J.; Morris-Natschke, S. L.; Lee, K. H.; Wu, T. S., Synthesis and biological evaluation of chalcone, dihydrochalcone, and 1,3-diarylpropane analogs as anti-inflammatory agents. *Bioorganic & medicinal chemistry letters* **2017**, *27* (7), 1547-1550.
2. Pathak, V.; Ahmad, I.; Kahlon, A. K.; Hasanain, M.; Sharma, S.; Srivastava, K. K.; Sarkar, J.; Shankar, K.; Sharma, A.; Gupta, A., Syntheses of 2-methoxyestradiol and eugenol template based diarylpropenes as non-steroidal anticancer agents. *RSC Advances* **2014**, *4* (66), 35171-35185.
3. Martin, E. F.; Pollo, L. A. E.; da Silva, L. A. L.; Biavatti, M. W.; Sandjo, L. P., In vitro studies of a series of synthetic compounds for their anti-acetylcholinesterase activities identified arylpyrano[2,3-f]coumarins as hit compounds. *Journal of Molecular Structure* **2022**, *1260*, 132799.
4. Lin, C. N.; Lee, T. H.; Hsu, M. F.; Wang, J. P.; Ko, F. N.; Teng, C. M., 2',5'-Dihydroxychalcone as a potent chemical mediator and cyclooxygenase inhibitor. *The Journal of pharmacy and pharmacology* **1997**, *49* (5), 530-6.
5. Bhat, B. A.; Dhar, K. L.; Puri, S. C.; Saxena, A. K.; Shanmugavel, M.; Qazi, G. N.,



Synthesis and biological evaluation of chalcones and their derived pyrazoles as potential cytotoxic agents. *Bioorganic & medicinal chemistry letters* **2005**, *15* (12), 3177-3180.

6. Ducki, S.; Rennison, D.; Woo, M.; Kendall, A.; Chabert, J. F. D.; McGown, A. T.; Lawrence, N. J., Combretastatin-like chalcones as inhibitors of microtubule polymerization. Part 1: Synthesis and biological evaluation of antivasular activity. *Bioorganic & Medicinal Chemistry* **2009**, *17* (22), 7698-7710.

7. Rao, Y. K.; Fang, S. H.; Tzeng, Y. M., Synthesis and biological evaluation of 3',4',5'-trimethoxychalcone analogues as inhibitors of nitric oxide production and tumor cell proliferation. *Bioorg Med Chem* **2009**, *17* (23), 7909-14.

8. Girish, Y. R.; Raghavendra, K. R.; Nagaraja, D.; Kumar, K. S. S.; Shashikanth, S., Transition Metal Free Chemoselective Reduction of  $\alpha,\beta$ -Unsaturated Ketones to Saturated Ketones Using Tosyl Hydrazide as a Hydrogen Donor. *Chinese Journal of Chemistry* **2015**, *33* (2), 181-184.
