# Supplementary material for: Identification of chalcone analogues as anti-inflammatory agents through the regulation of NF-κB and JNK activation
Source: Royal Society of Chemistry journal article supplement (doi:10.1039/d4md00011k), 2024-01-01

Figure 5C, 3h

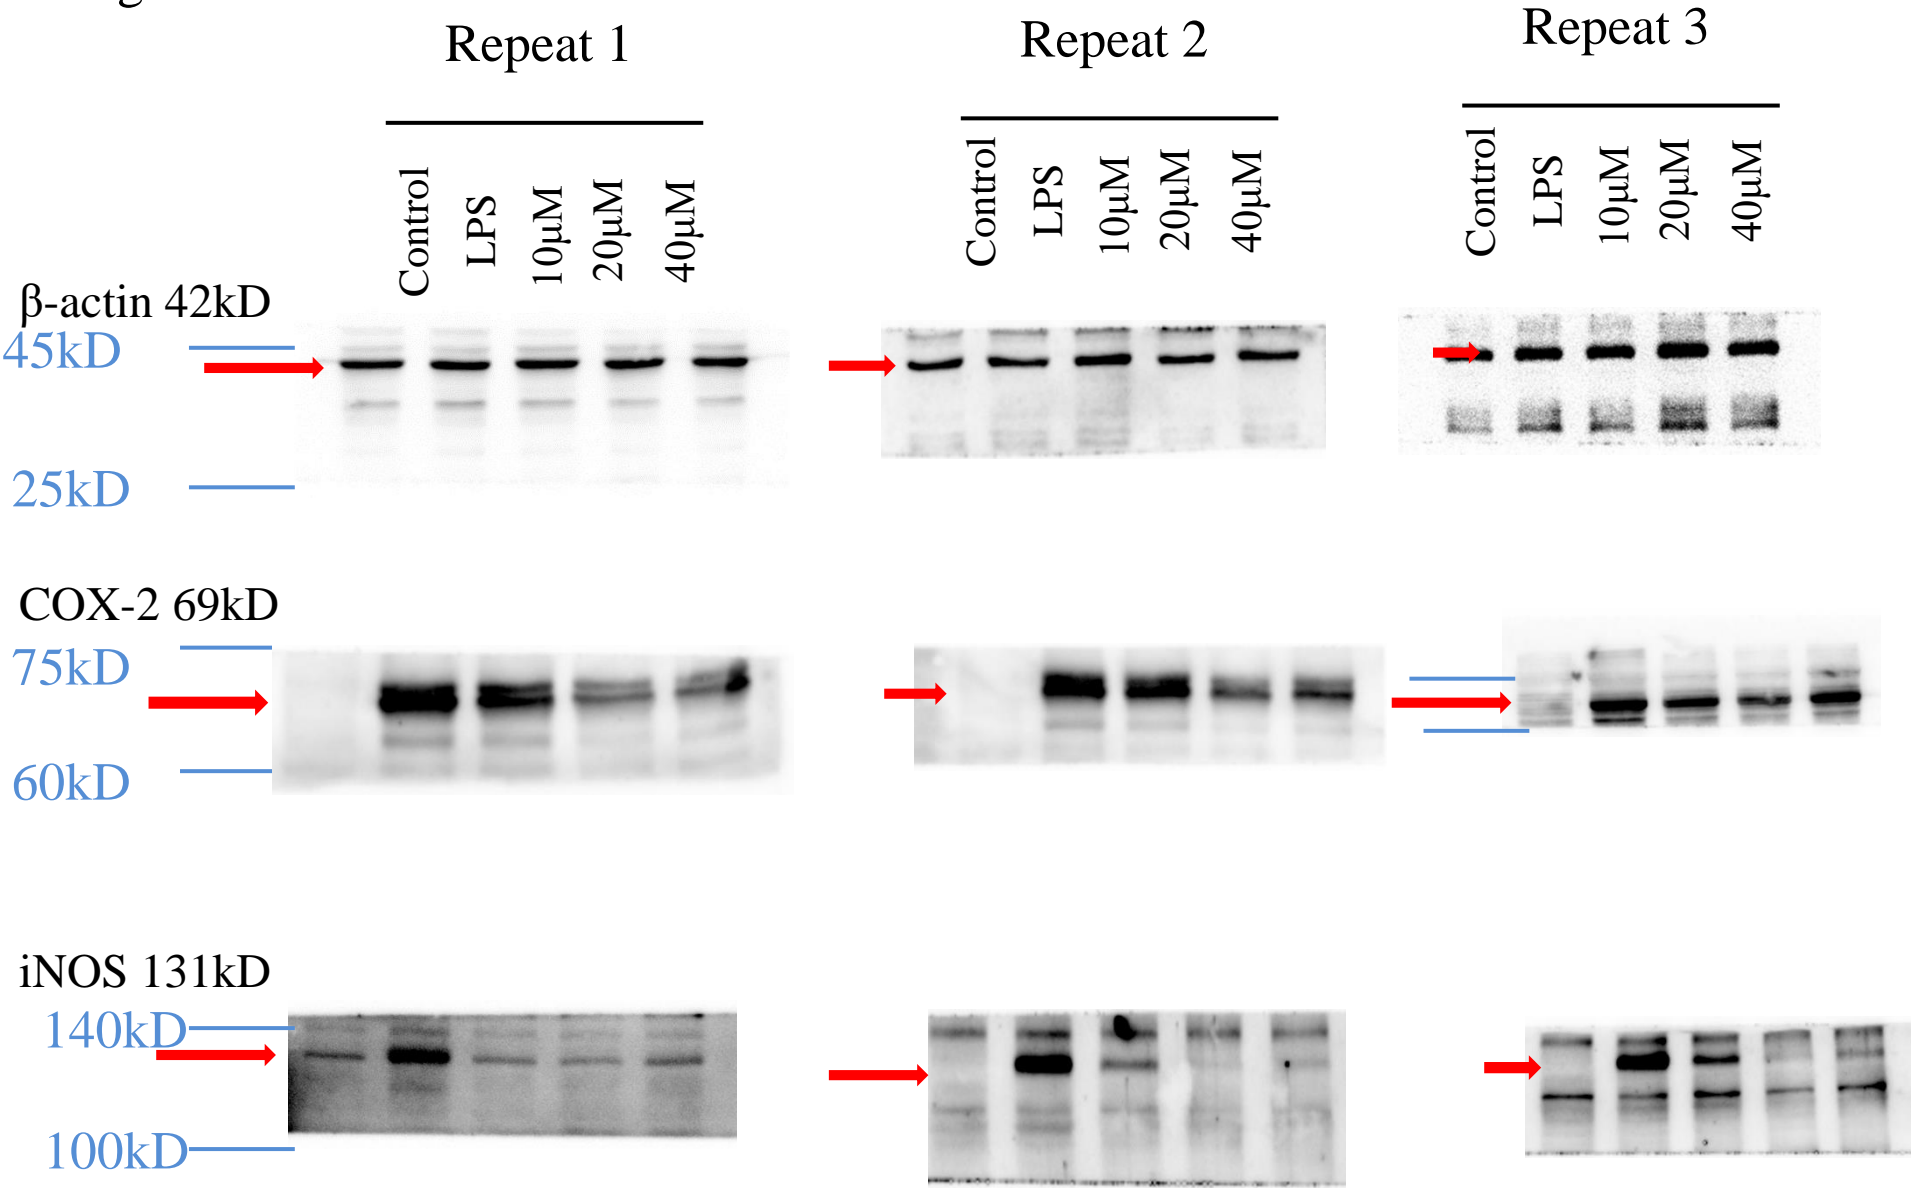



Figure 8A, 3h

Repeat 1

Repeat 2

Repeat 3

Control  
LPS  
10 $\mu$ M  
20 $\mu$ M  
40 $\mu$ M

Control  
LPS  
10 $\mu$ M  
20 $\mu$ M  
40 $\mu$ M

Control  
LPS  
10 $\mu$ M  
20 $\mu$ M  
40 $\mu$ M

P65 65kD

75kD  
60kD

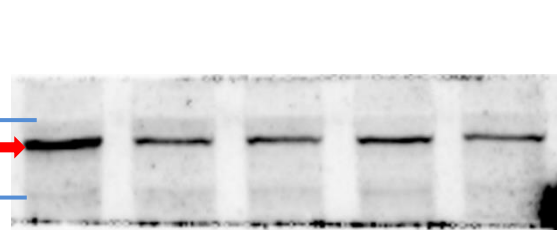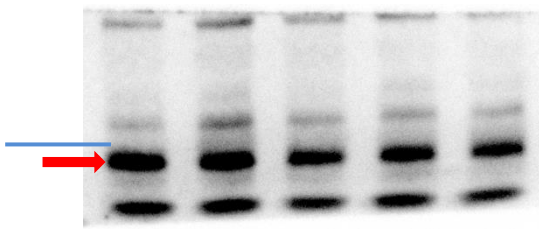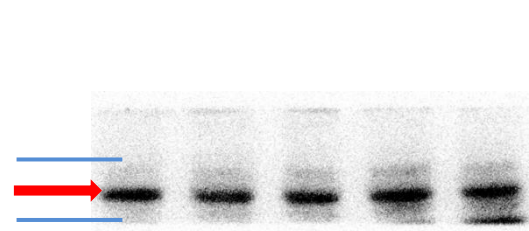

P-P65 65kD

75kD  
60kD

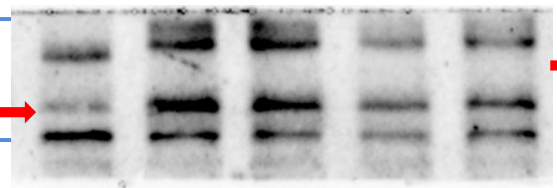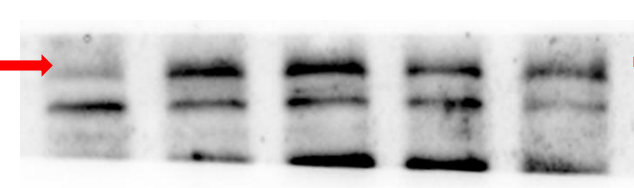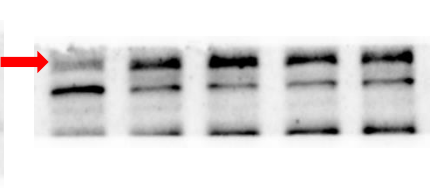

Figure 8B, 31

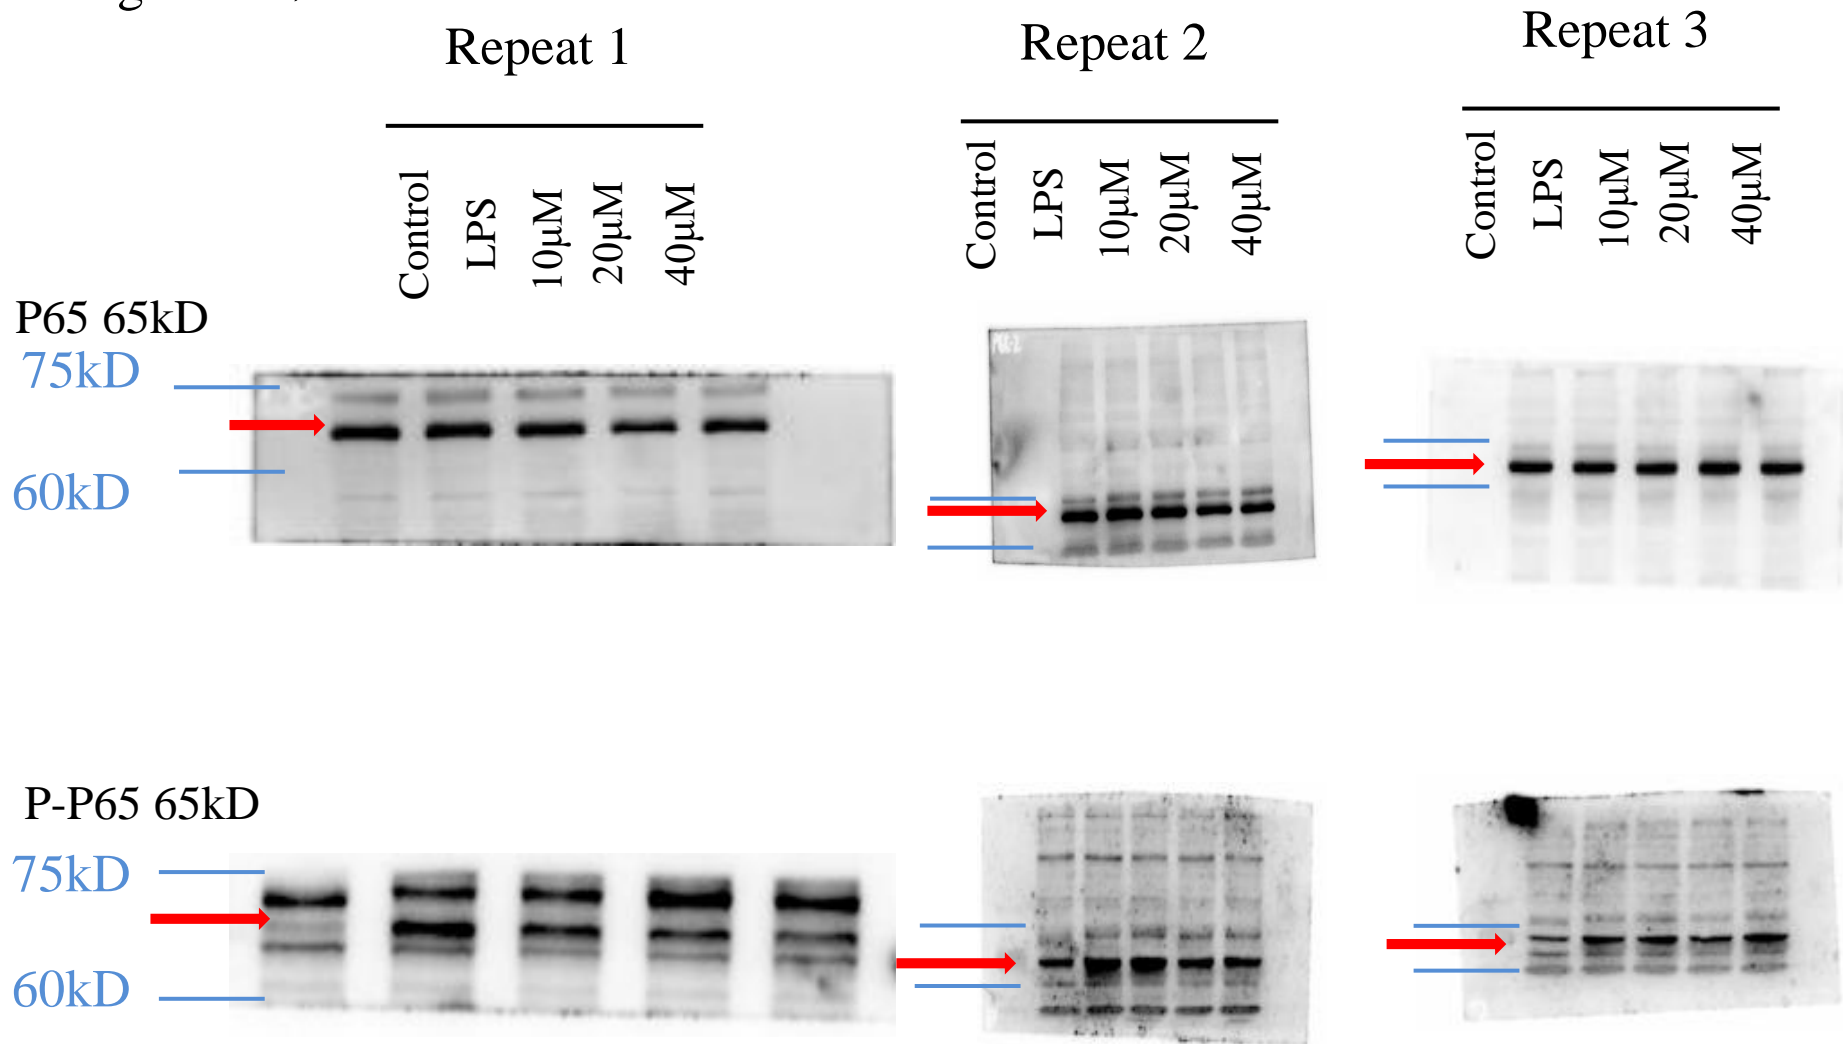

Figure 8C, 3h

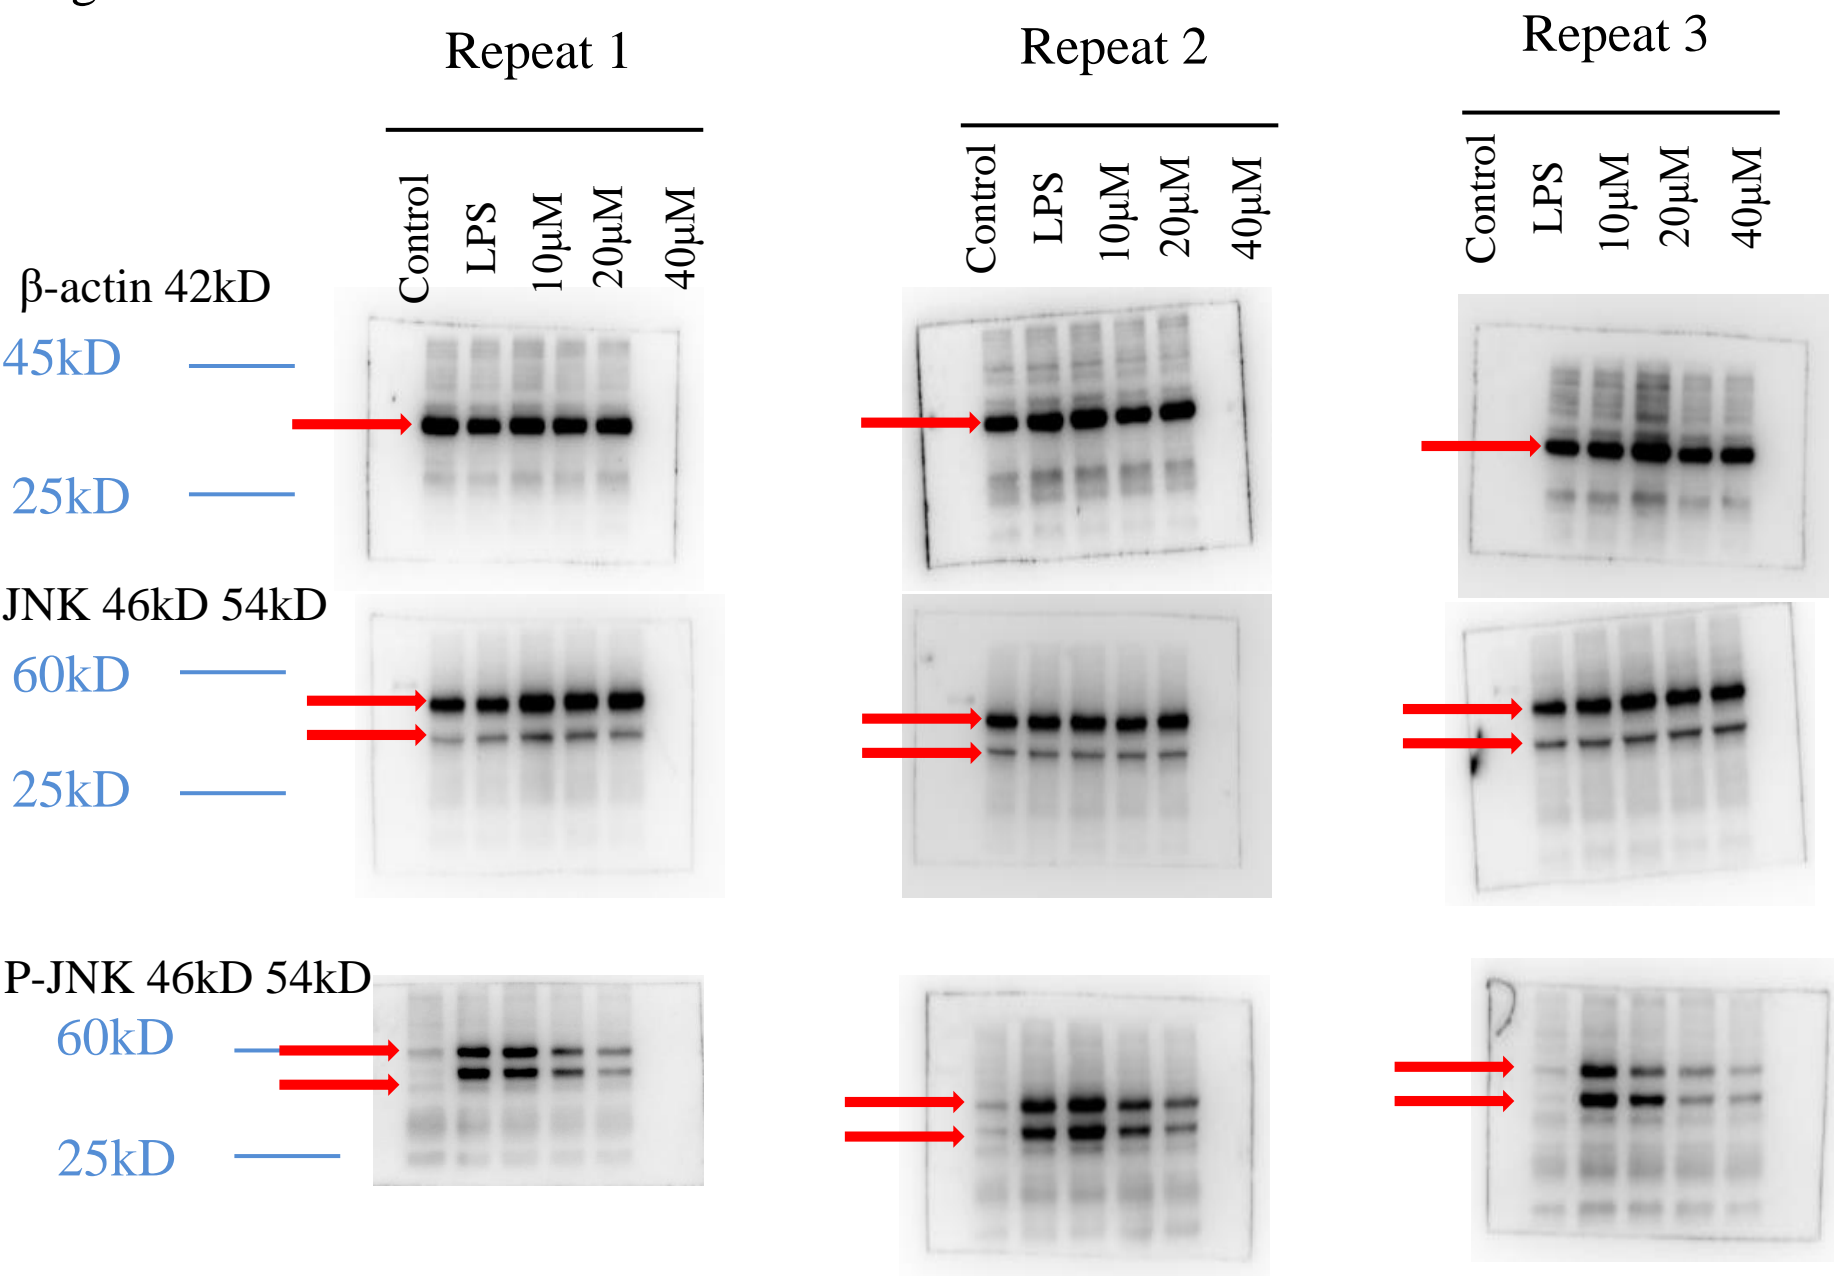

Figure 8D, 31

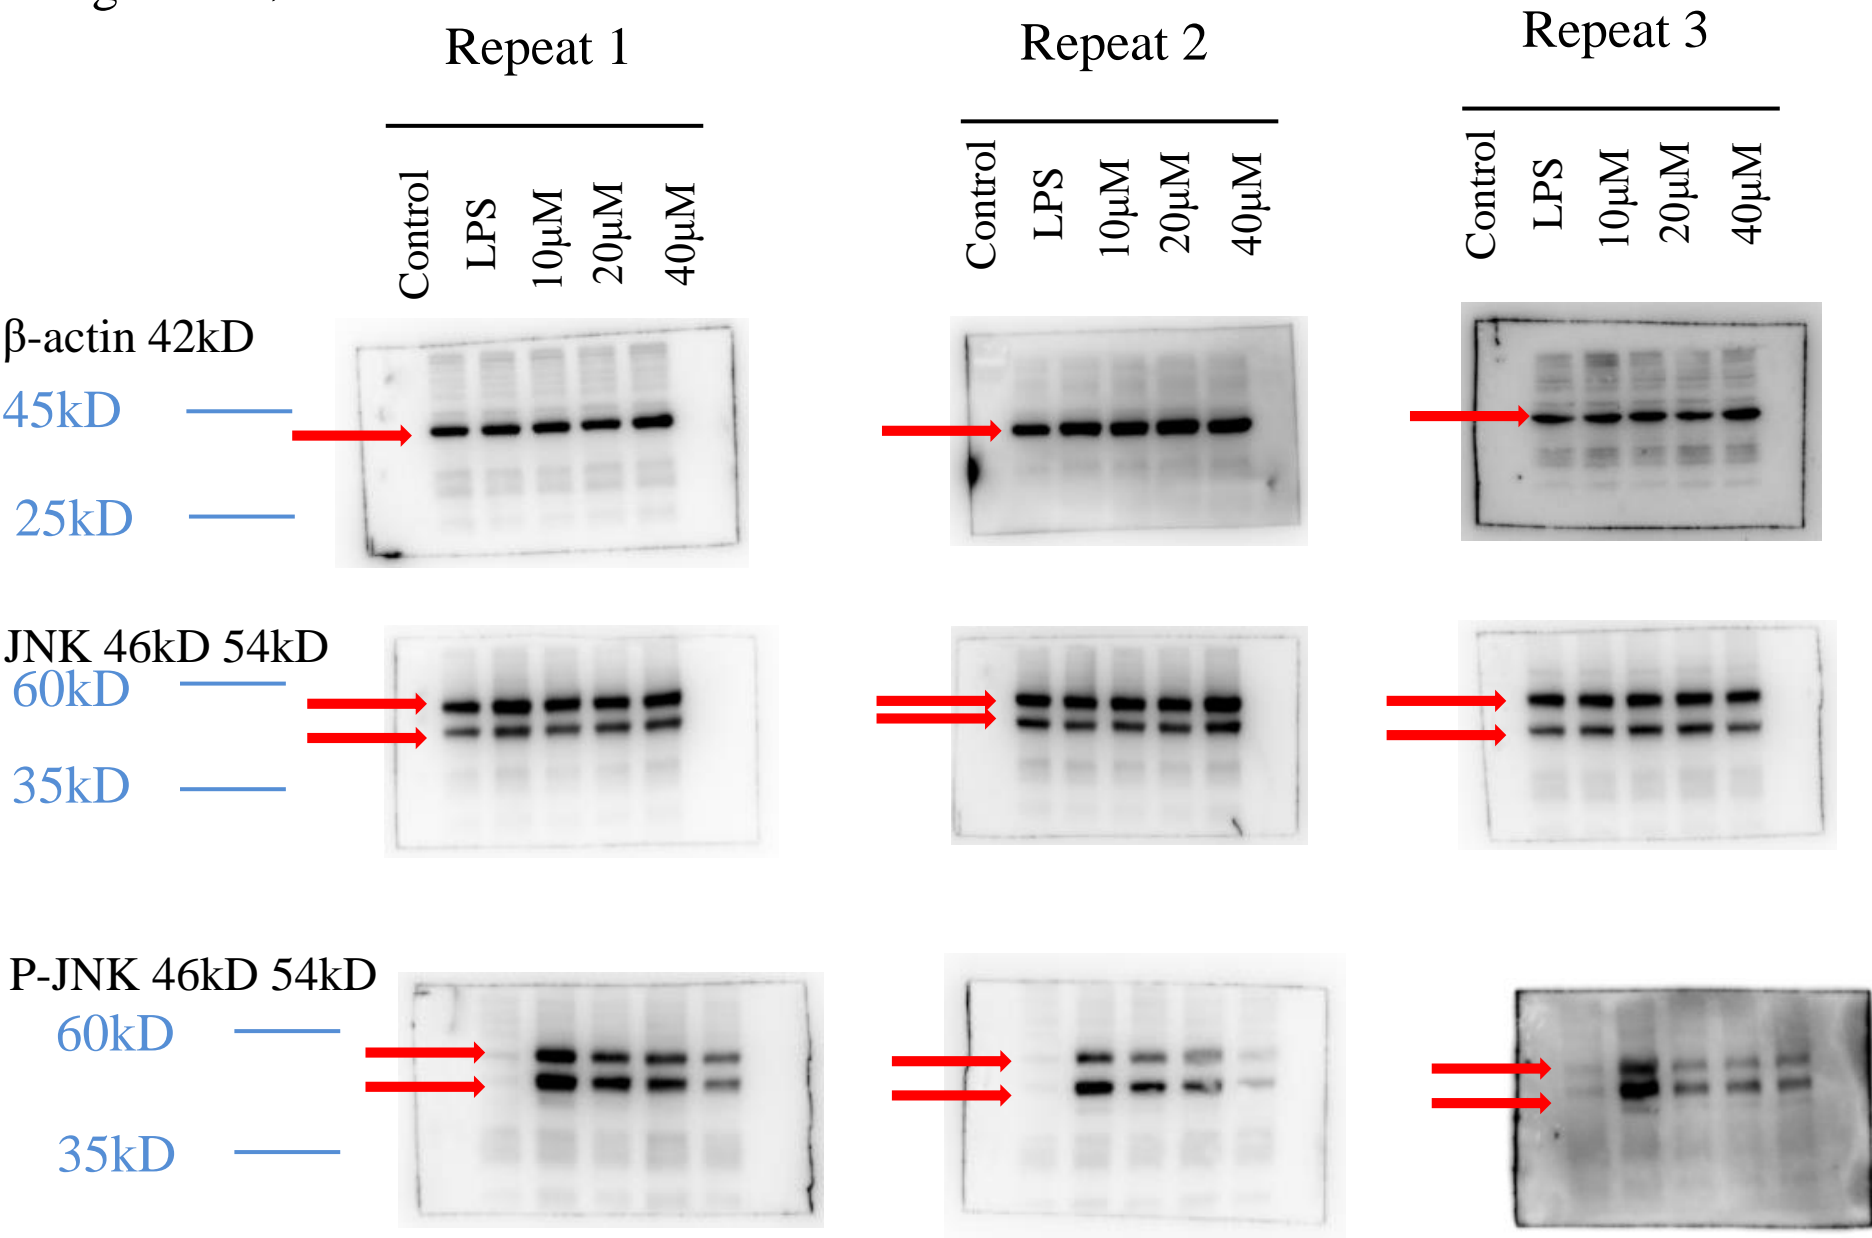

Supplement: d4md00011k2.pdf [file d4md00011k2.pdf]
